# Supplementary material for: Nickel(II) and Palladium(II) Complexes with η5:κ1(N)-Coordinated Dicarbollide Ligands Containing Pendant Pyridine Group
Source: MDPI journal article supplement (doi:10.3390/ijms242015069), 2023-10-11
Supplement: s1 [file s1]

## *Supplementary Materials*

# **Nickel(II) and Palladium(II) Complexes with $\eta^5:\kappa^1(N)$ -Coordinated Dicarbolide Ligands Containing Pendant Pyridine Group**

**Dmitriy K. Semyonov <sup>1,2</sup>, Marina Yu. Stogniy <sup>1\*</sup>, Sergey A. Anufriev <sup>1</sup>, Sergey V. Timofeev <sup>1</sup>, Kyrill Yu. Suponitsky <sup>1,3</sup> and Igor B. Sivaev <sup>1</sup>**

<sup>1</sup> A.N. Nesmeyanov Institute of Organoelement Compounds, Russian Academy of Sciences, 28 Vavilov Str., 119991, Moscow, Russia; dksemyonov@mail.ru (D.K.S.); stogniy@ineos.ac.ru (M.Y.S.); truman476@mail.ru (S.A.A.); timofeev@ineos.ac.ru (S.V.T.); kirshik@yahoo.com (K.Y.S.); sivaev@ineos.ac.ru (I.B.S.)

<sup>2</sup> M.V. Lomonosov Institute of Fine Chemical Technology, MIREA - Russian Technological University, 86 Vernadsky Av., 119571, Moscow, Russia

<sup>3</sup> Basic Department of Chemistry of Innovative Materials and Technologies, G.V. Plekhanov Russian University of Economics, 36 Stremyannyi Line, 117997, Moscow, Russia

\* Correspondence: stogniy@ineos.ac.ru

Spectral data for Cs[9-(NC<sub>5</sub>H<sub>4</sub>-2'-S)-7,8-C<sub>2</sub>B<sub>9</sub>H<sub>11</sub>] (**1**)

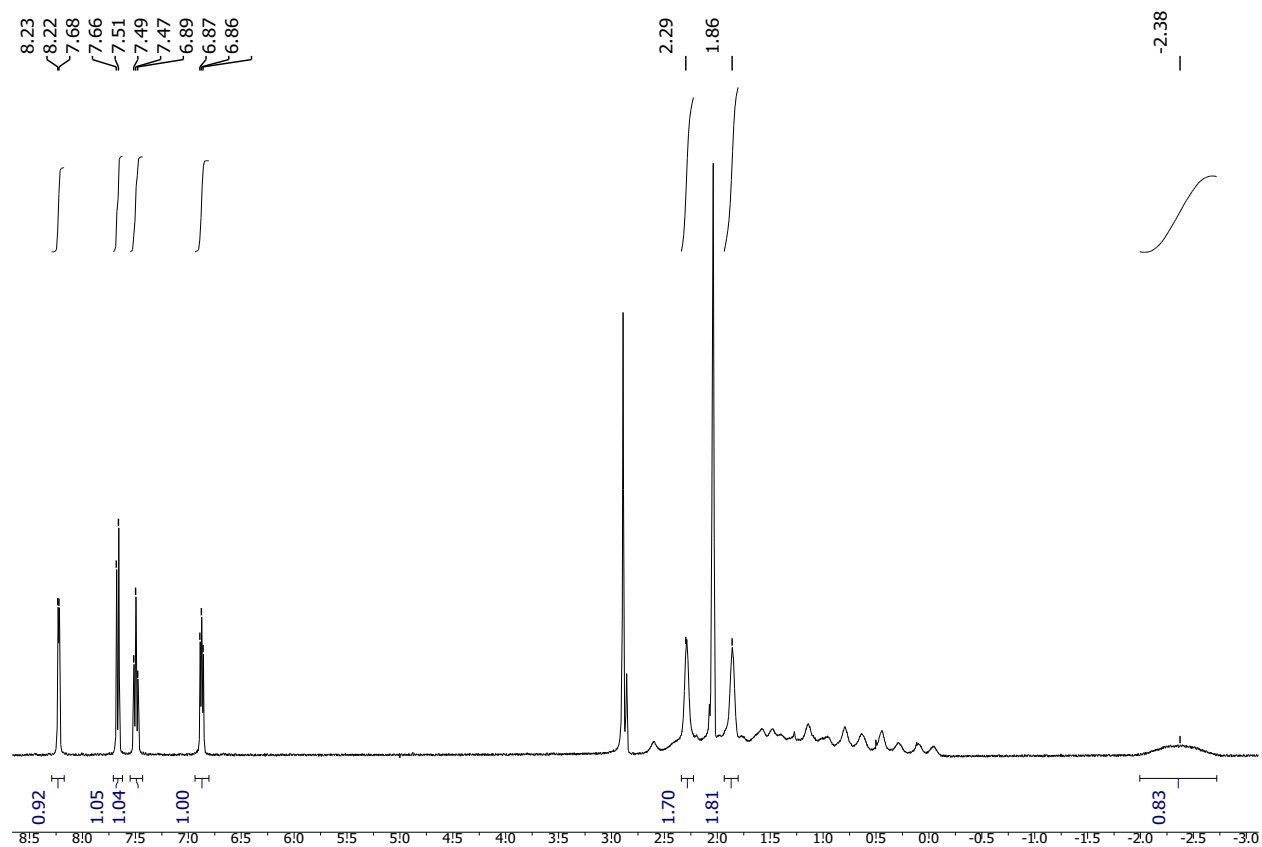

Figure S1. <sup>1</sup>H NMR spectrum of **1** in acetone-d<sub>6</sub>

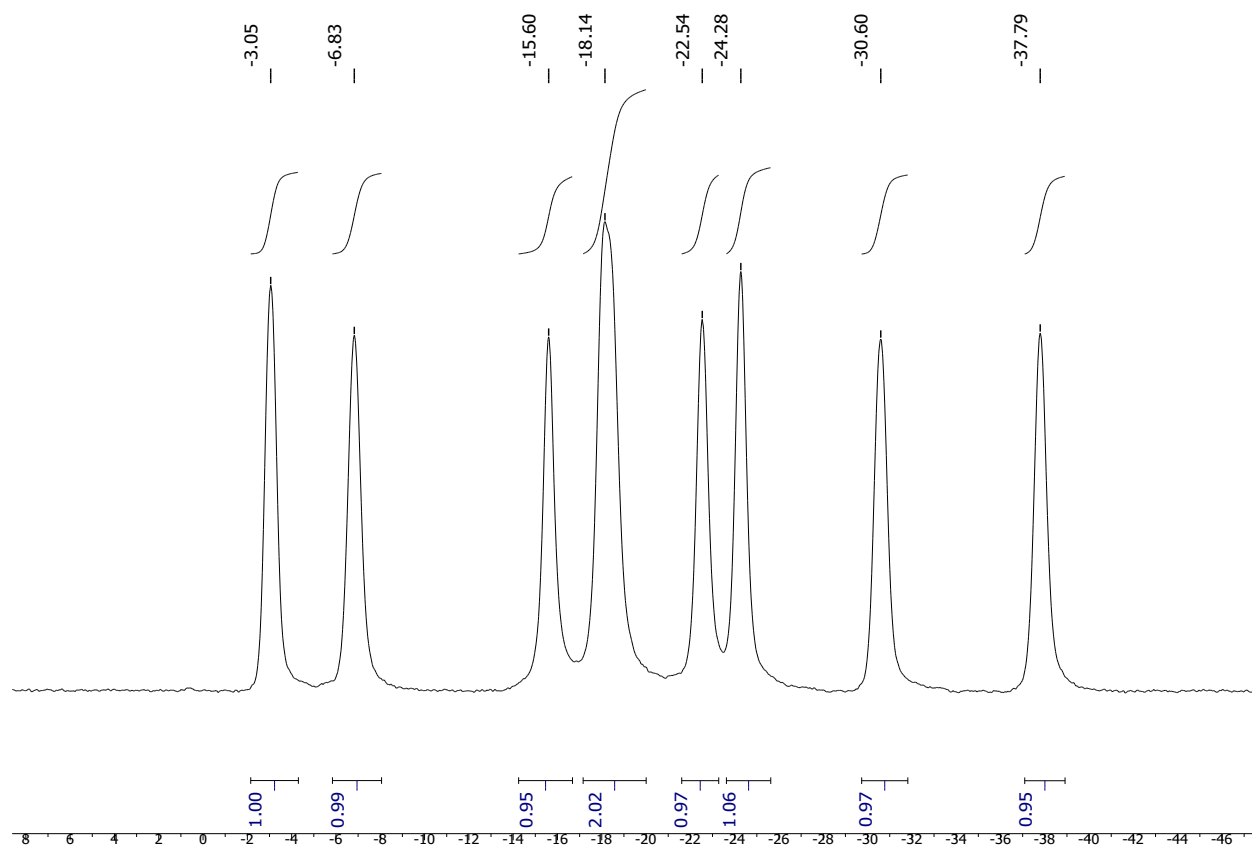

Figure S2. <sup>11</sup>B{<sup>1</sup>H} NMR spectrum of **1** in acetone-d<sub>6</sub>

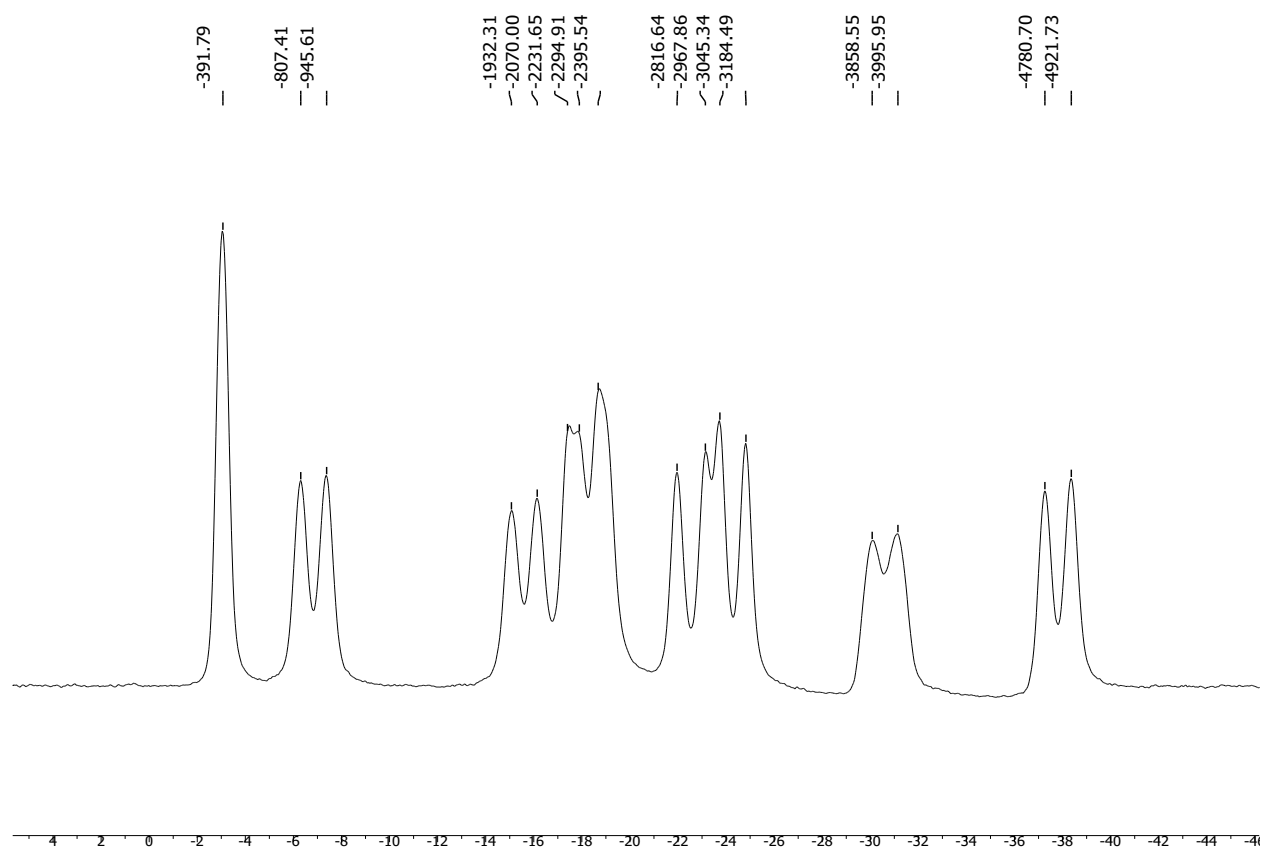

Figure S3.  $^{11}\text{B}$  NMR spectrum of **1** in acetone- $\text{d}_6$

Spectral data for 1-(NC<sub>5</sub>H<sub>4</sub>-2'-S)-1,2-C<sub>2</sub>B<sub>10</sub>H<sub>11</sub> (**2**)

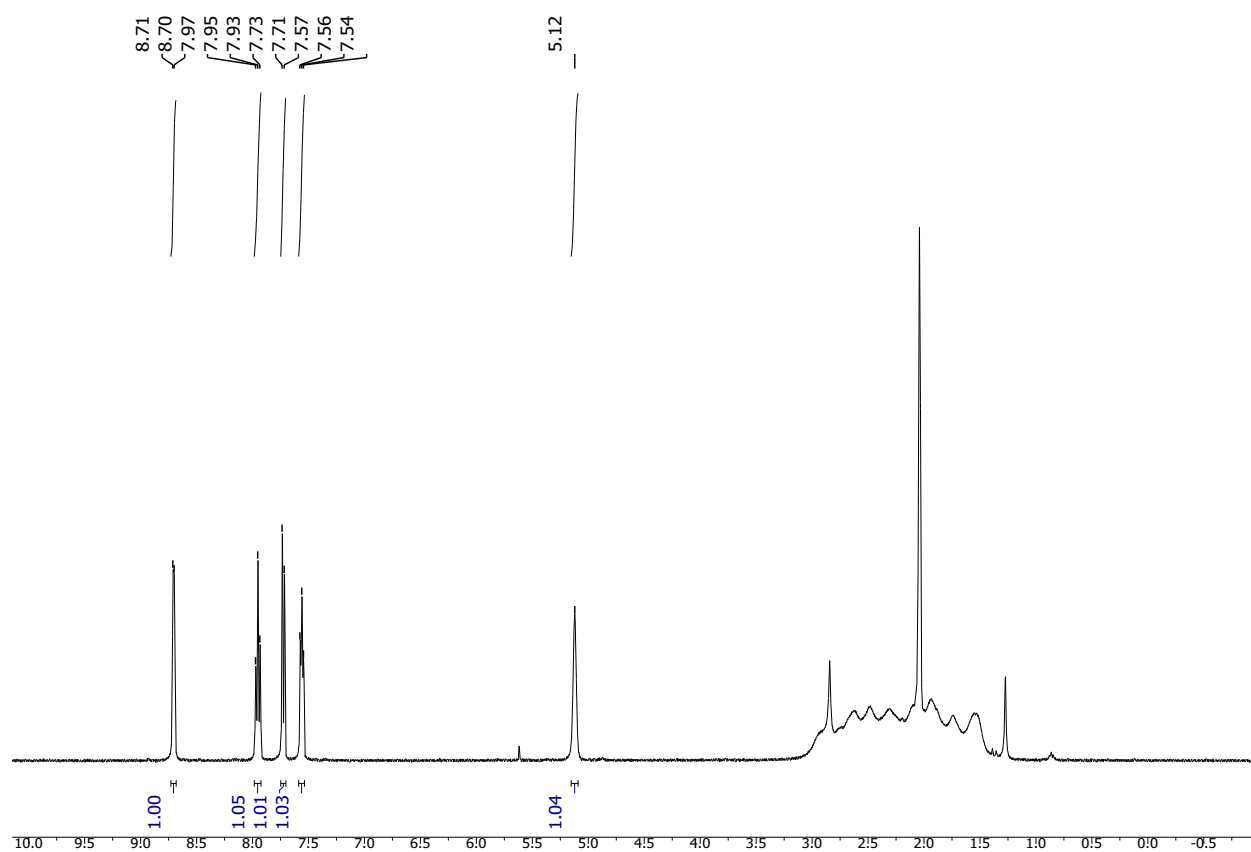

Figure S4. <sup>1</sup>H NMR spectrum of **2** in acetone-d<sub>6</sub>

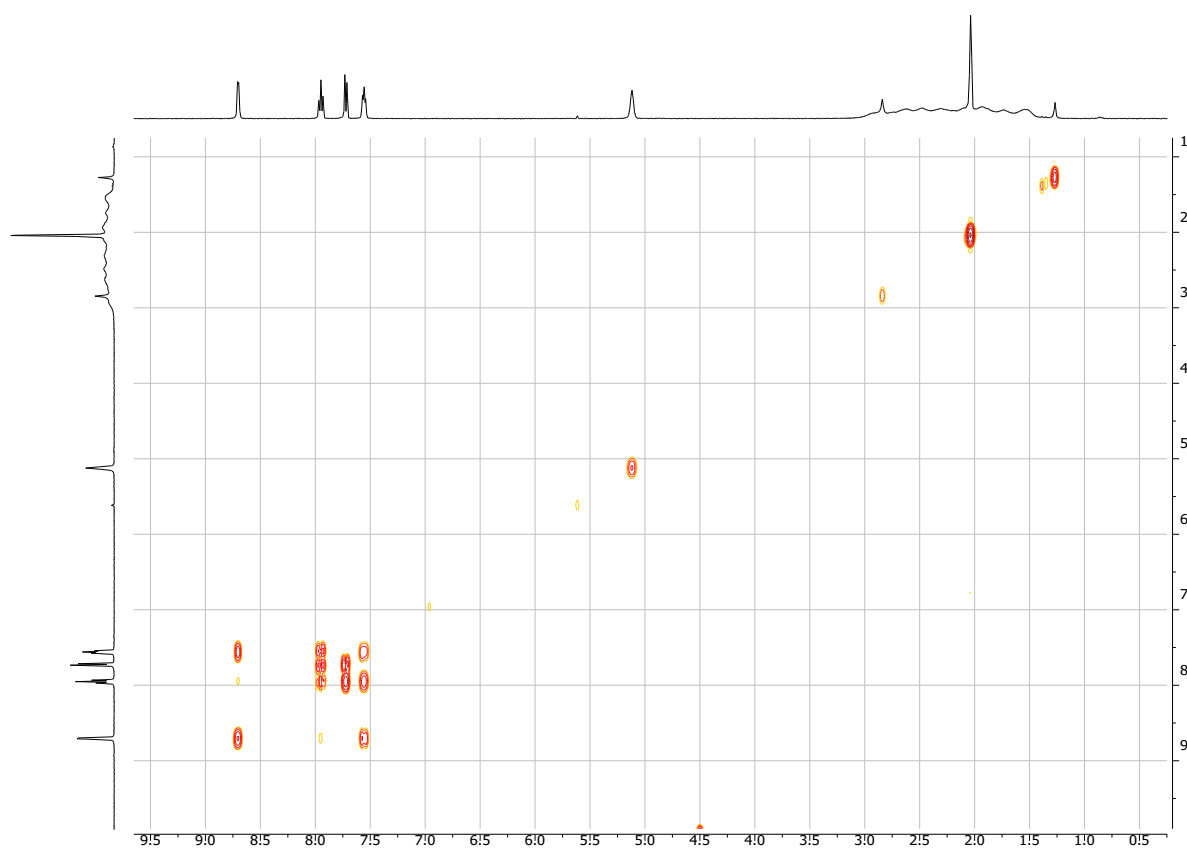

Figure S5. (HH) COSY NMR spectrum of **2** in acetone-d<sub>6</sub>

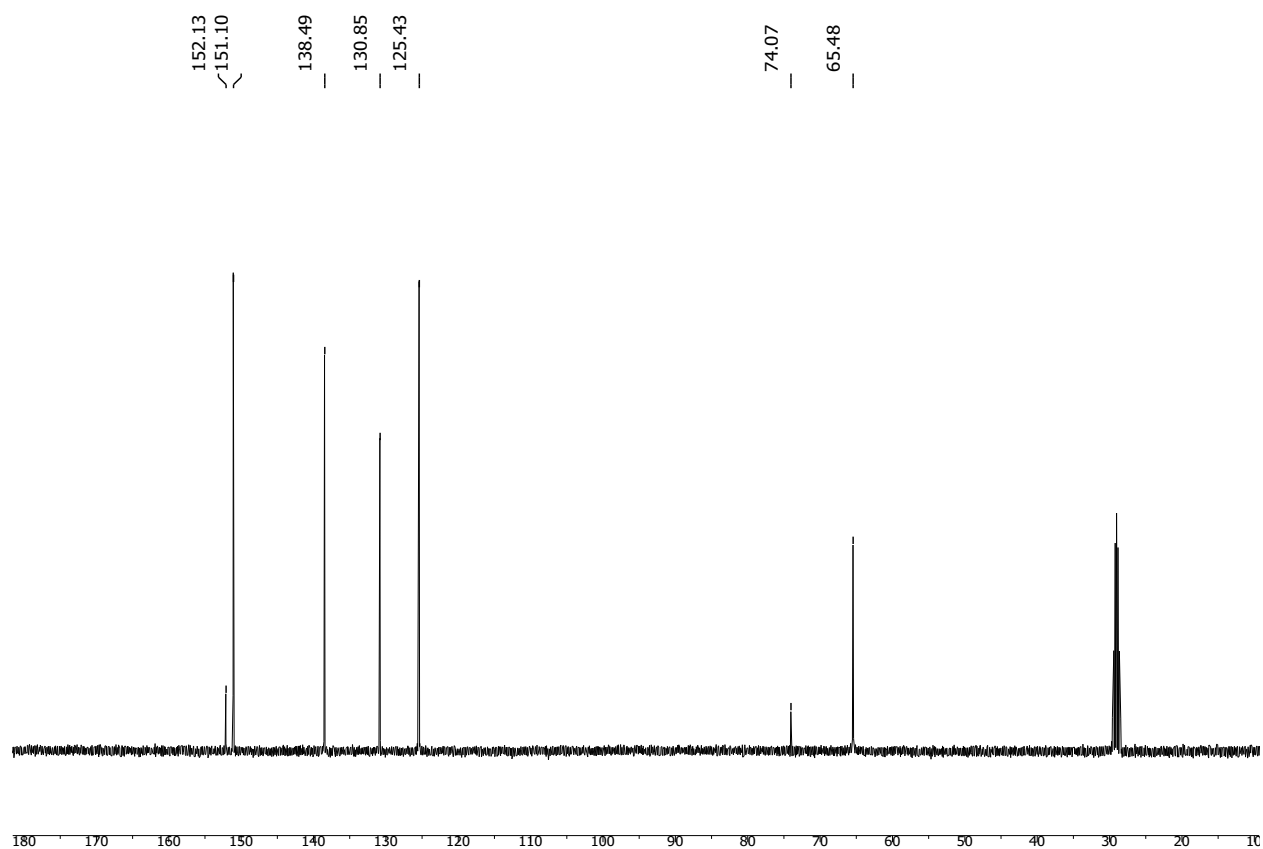

Figure S6.  $^{13}\text{C}$  NMR spectrum of **2** in acetone- $\text{d}_6$

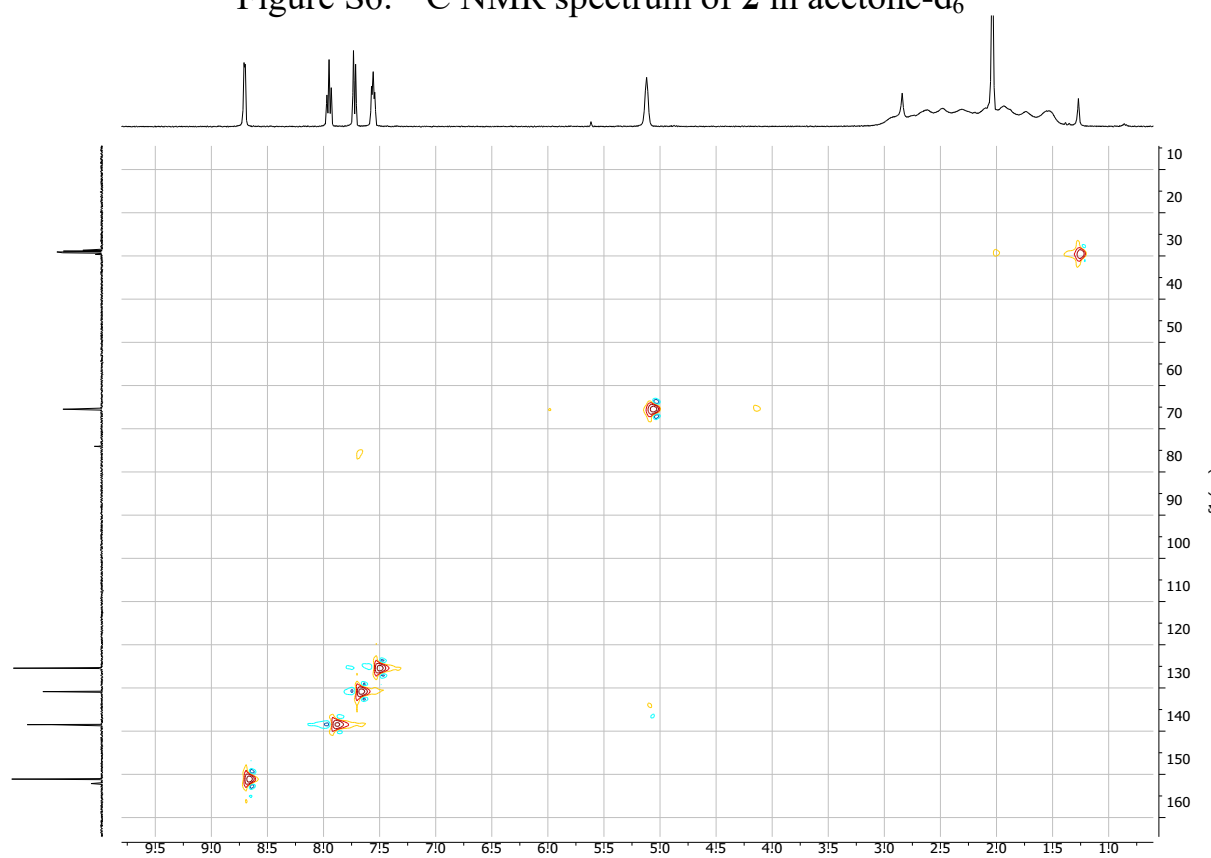

Figure S7. (H,C) HSQC NMR spectrum of **2** in acetone- $\text{d}_6$

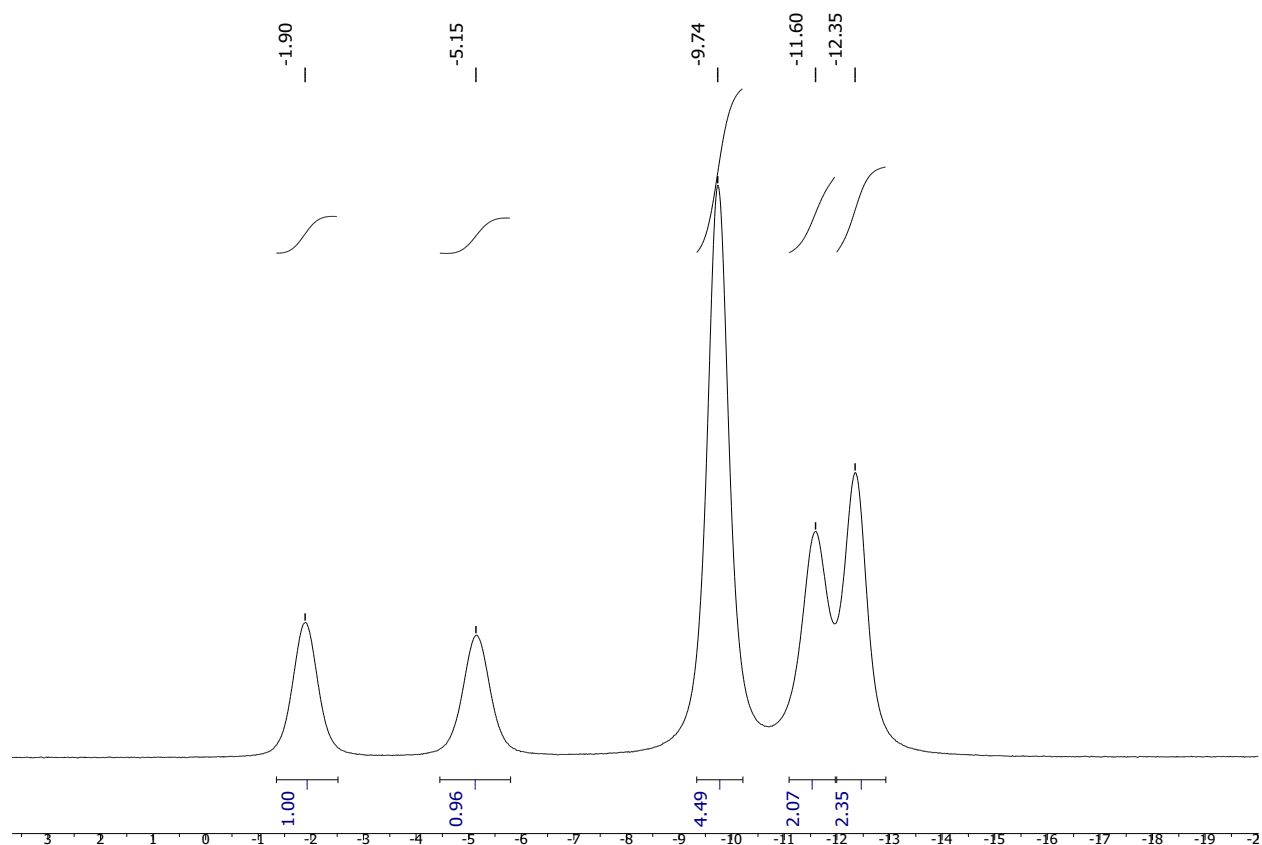

Figure S8.  $^{11}\text{B}\{^1\text{H}\}$  NMR spectrum of **2** in acetone- $\text{d}_6$

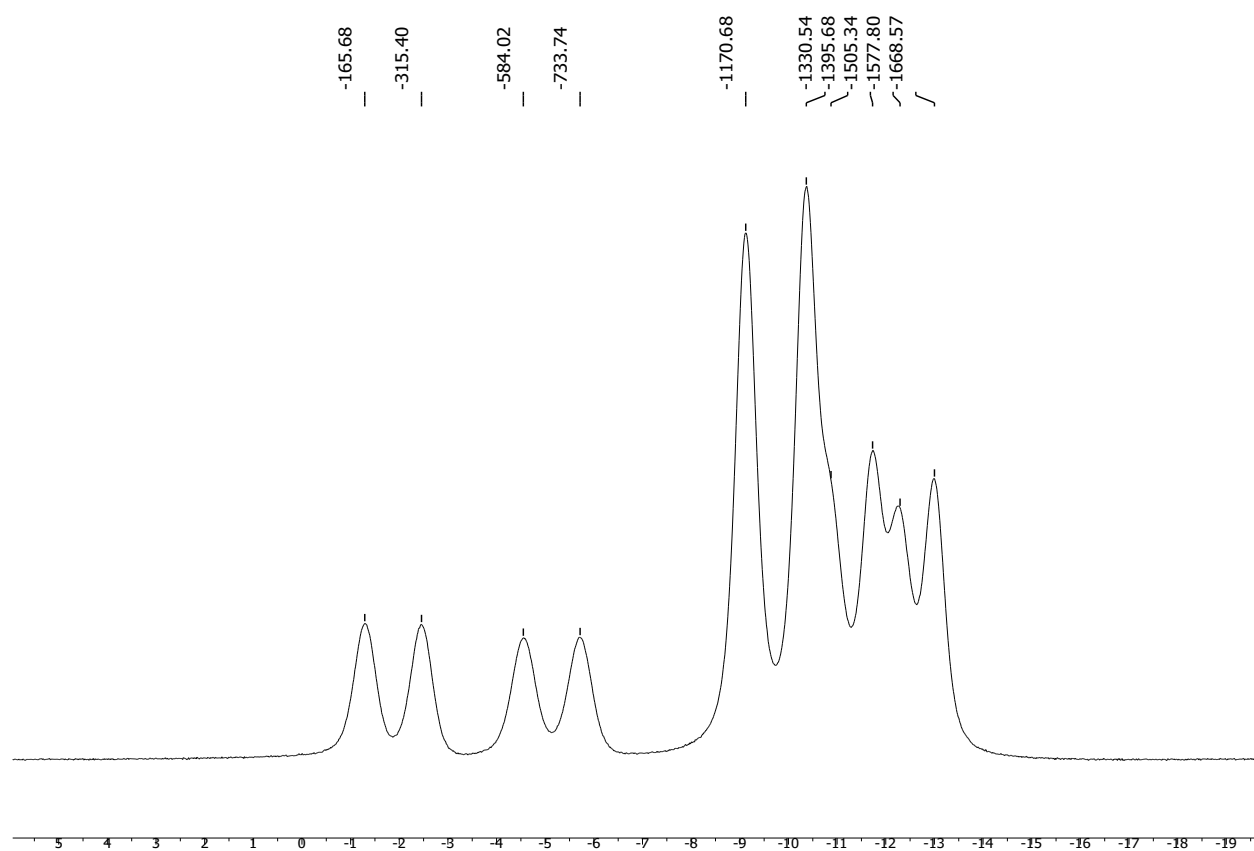

Figure S9.  $^{11}\text{B}$  NMR spectrum of **2** in acetone- $\text{d}_6$

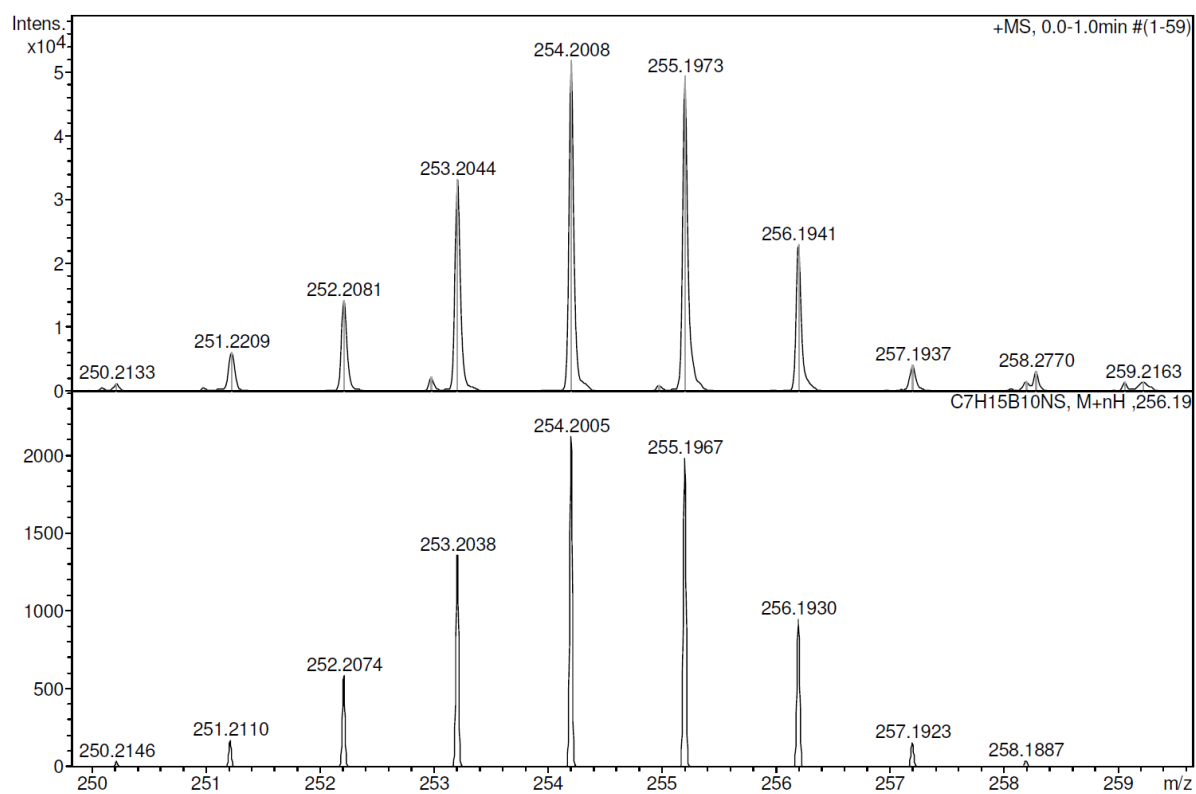

Figure S10. HRMS spectrum of **2**

Spectral data for [7-(HNC<sub>5</sub>H<sub>4</sub>-2'-S)-7,8-C<sub>2</sub>B<sub>9</sub>H<sub>11</sub>] (**H[3]**)

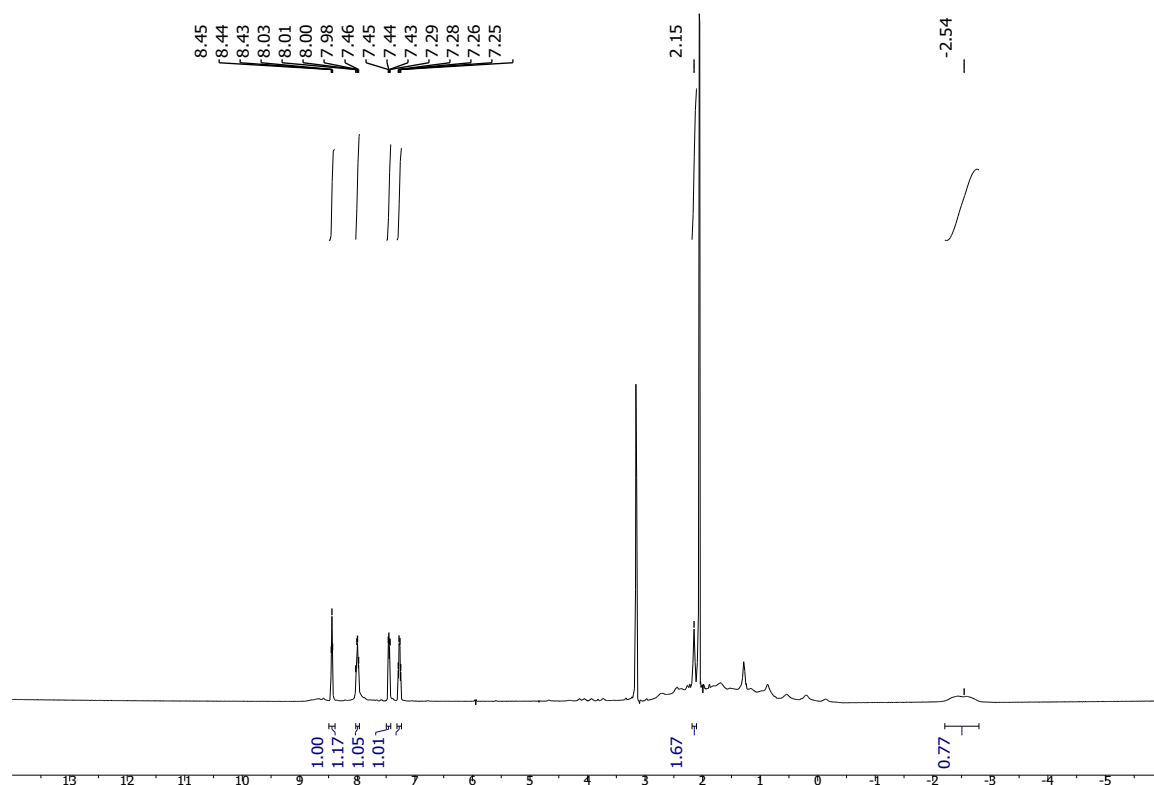

Figure S11. <sup>1</sup>H NMR spectrum of **H[3]** in acetone-d<sub>6</sub>

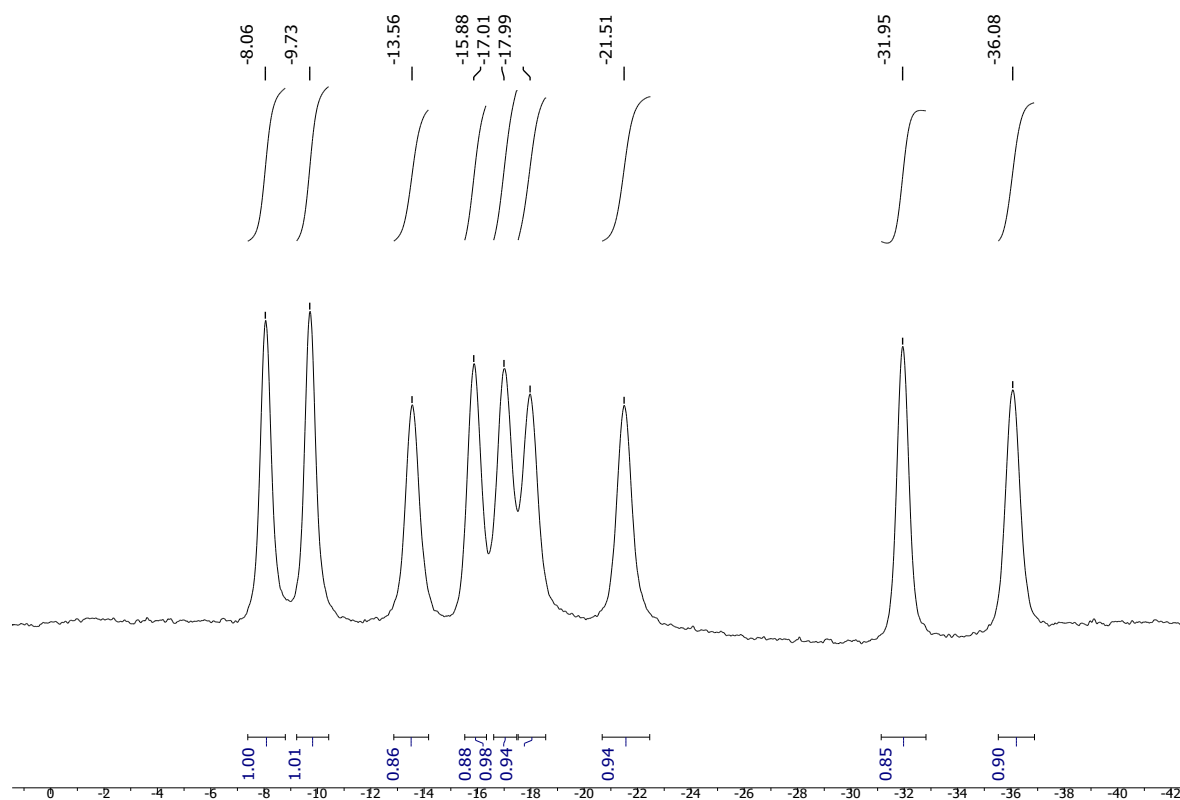

Figure S12. <sup>11</sup>B{<sup>1</sup>H} NMR spectrum of **H[3]** in acetone-d<sub>6</sub>



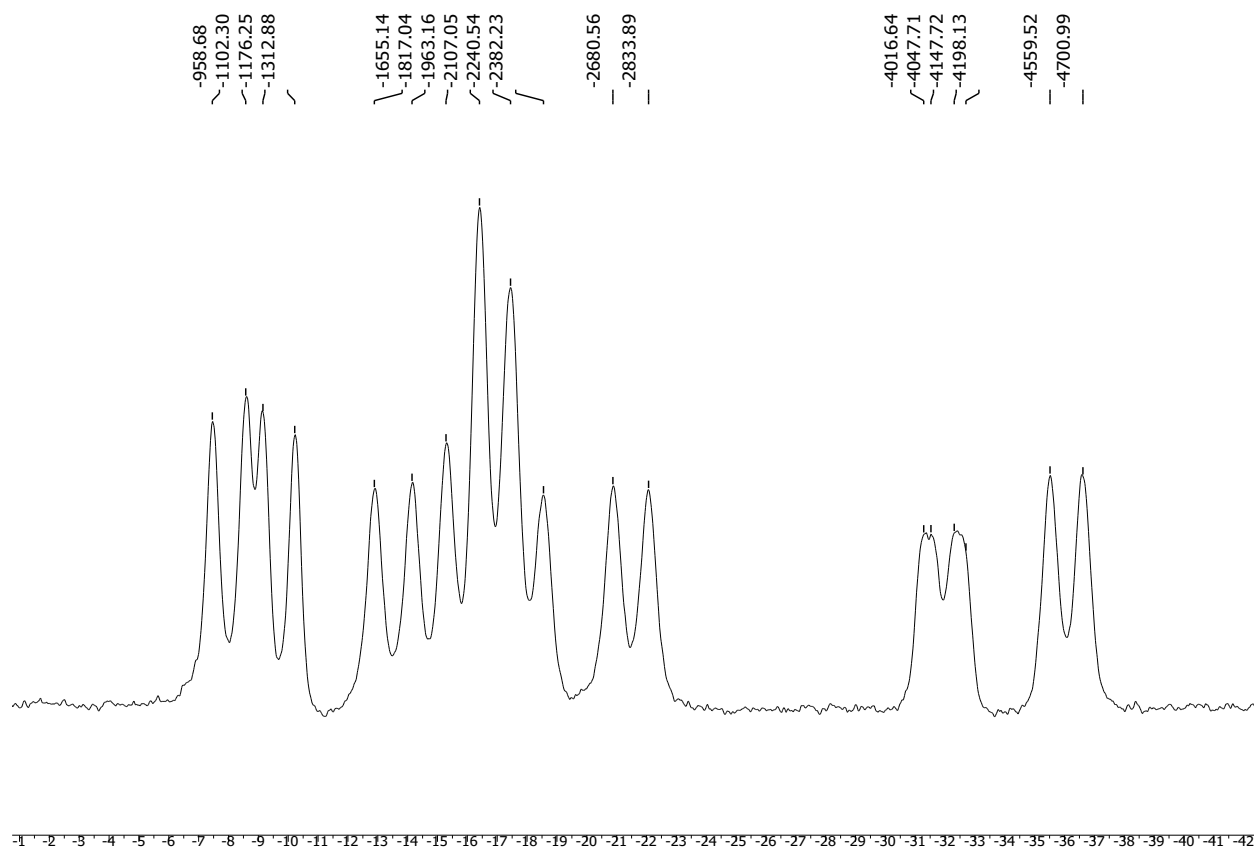

Figure S13. <sup>11</sup>B NMR spectrum of **H[3]** in acetone-d<sub>6</sub>

Spectral data for Cs[7-(NC<sub>5</sub>H<sub>4</sub>-2'-S)-7,8-C<sub>2</sub>B<sub>9</sub>H<sub>11</sub>] (**Cs[3]**)

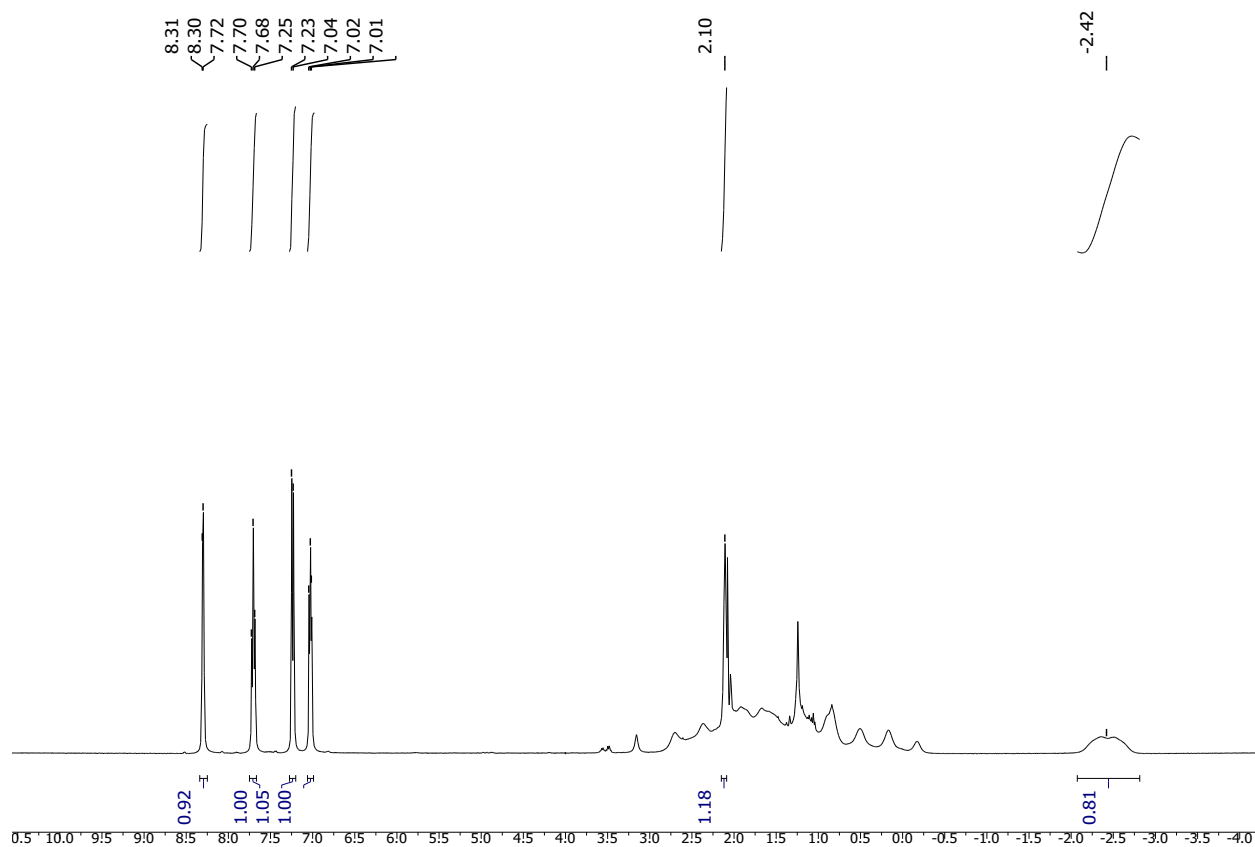

Figure S14. <sup>1</sup>H NMR spectrum of **Cs[3]** in acetone-d<sub>6</sub>

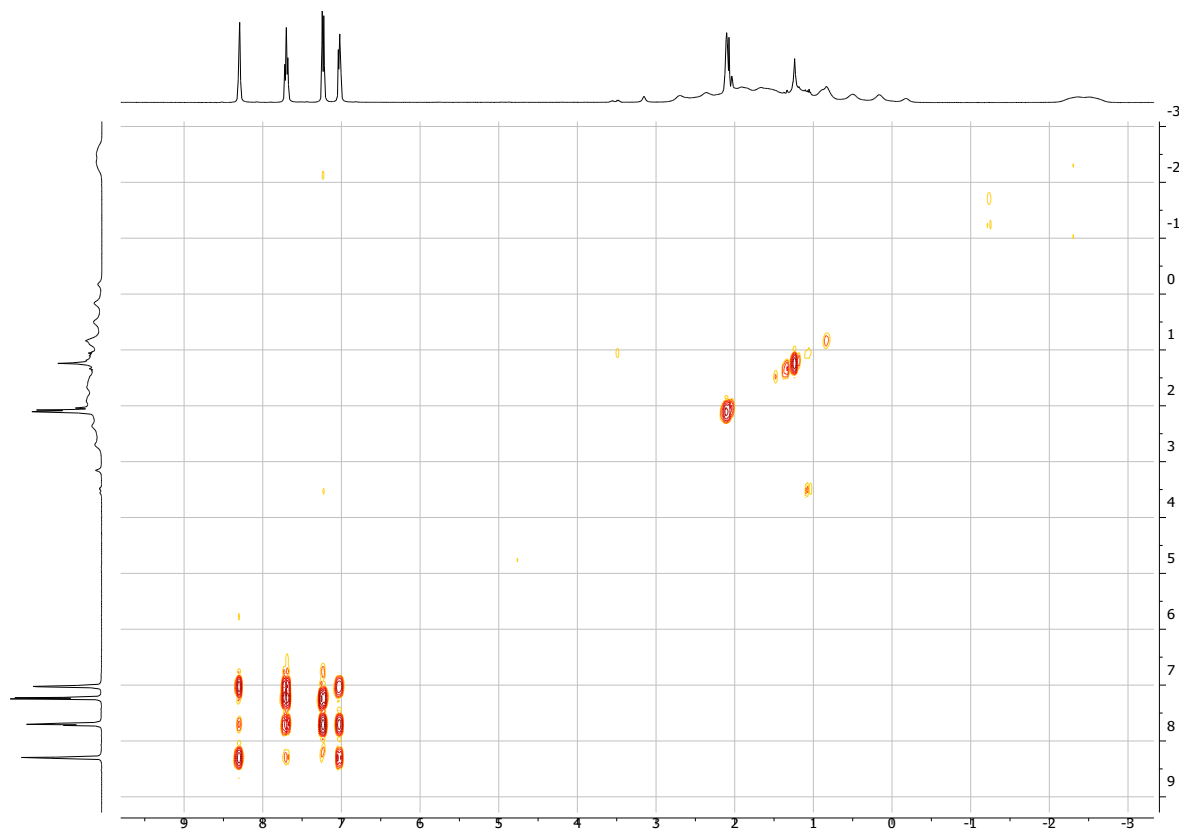

Figure S15. (HH) COSY NMR spectrum of **Cs[3]** in acetone-d<sub>6</sub>

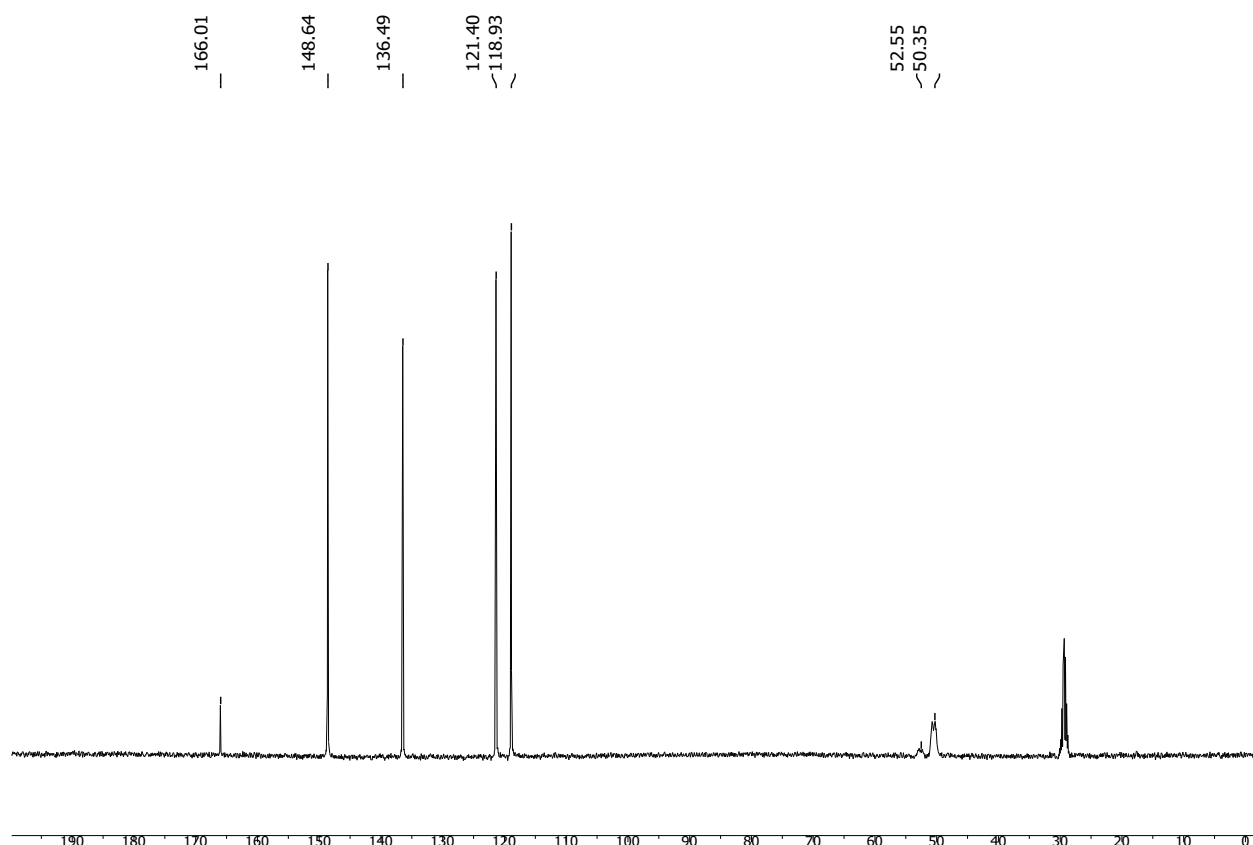

Figure S16.  $^{13}\text{C}$  NMR spectrum of **Cs[3]** in acetone- $\text{d}_6$

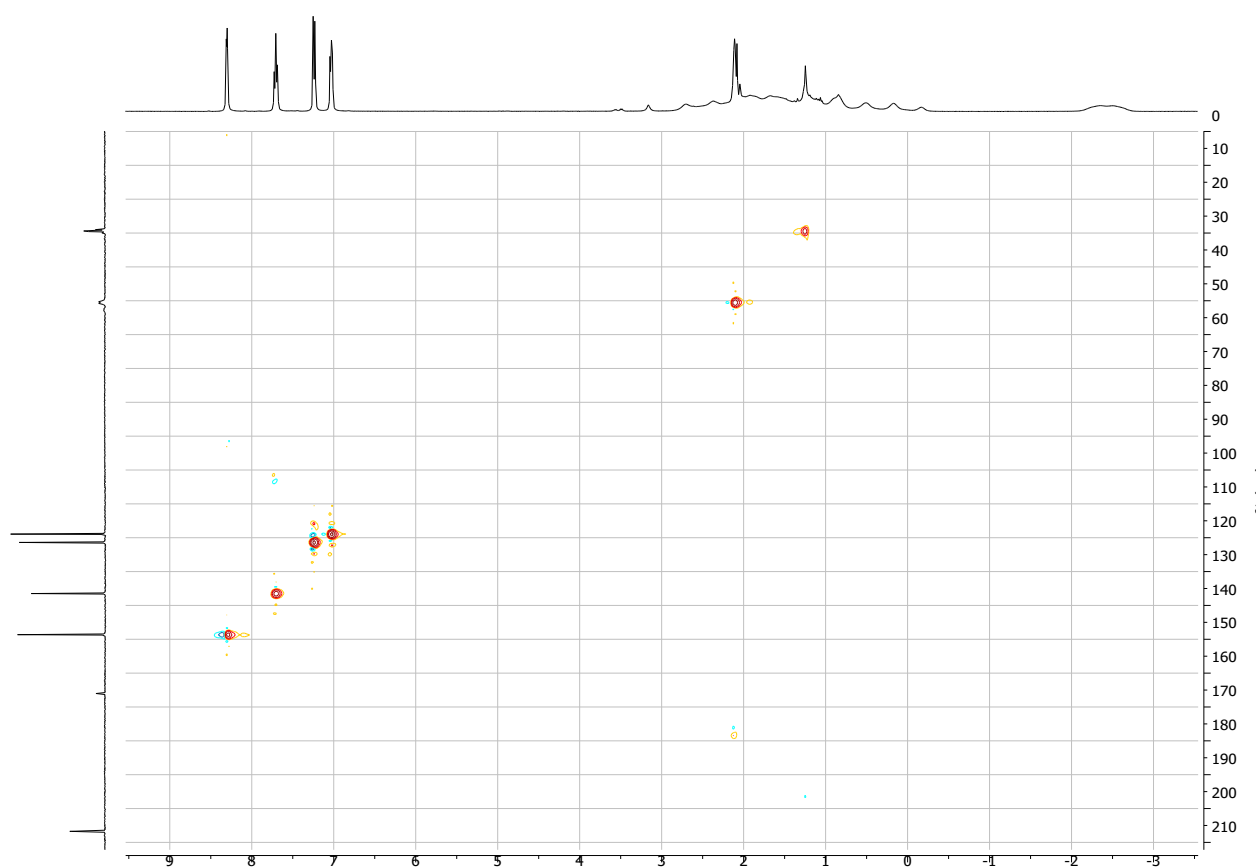

Figure S17. (H)C HSQC NMR spectrum of **Cs[3]** in acetone- $\text{d}_6$

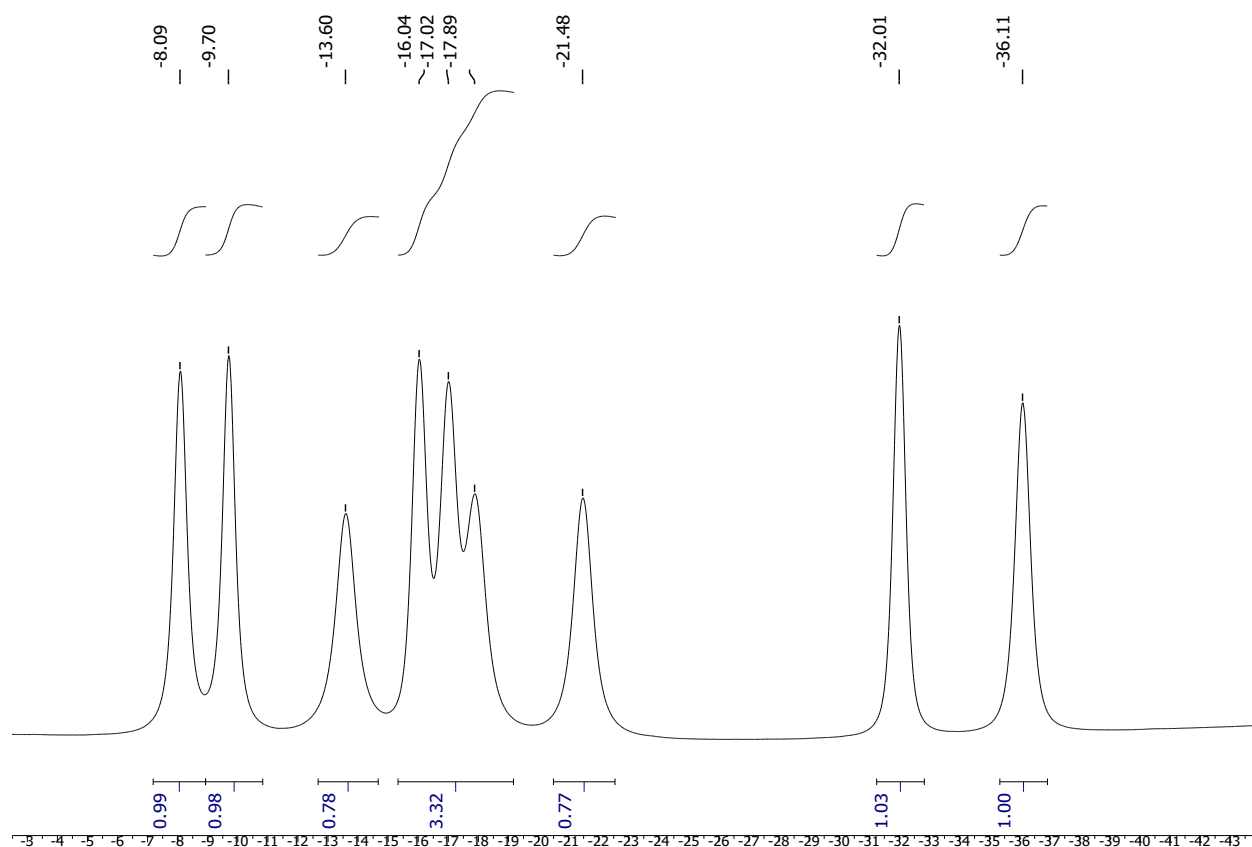

Figure S18.  $^{11}\text{B}\{^1\text{H}\}$  NMR spectrum of **Cs[3]** in acetone- $\text{d}_6$

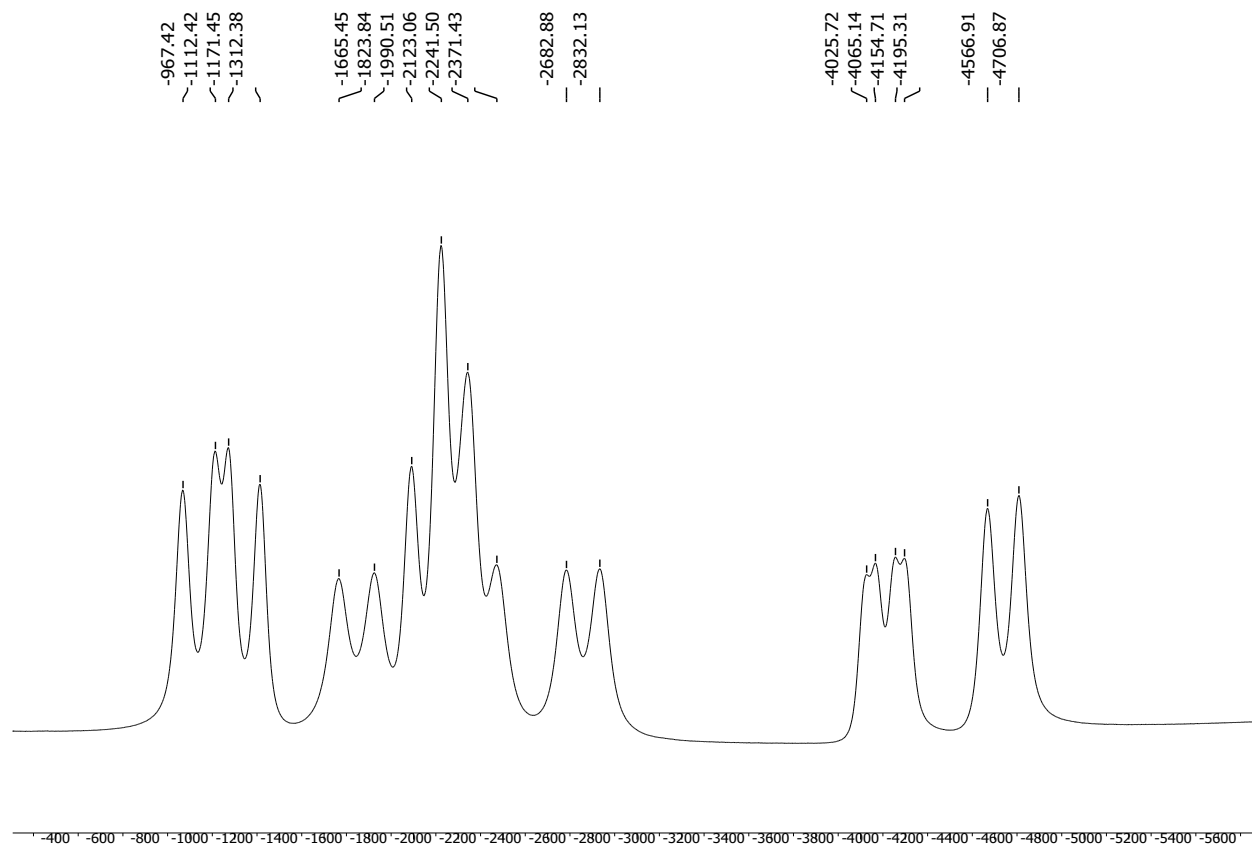

Figure S19.  $^{11}\text{B}$  NMR spectrum of **Cs[3]** in acetone- $\text{d}_6$

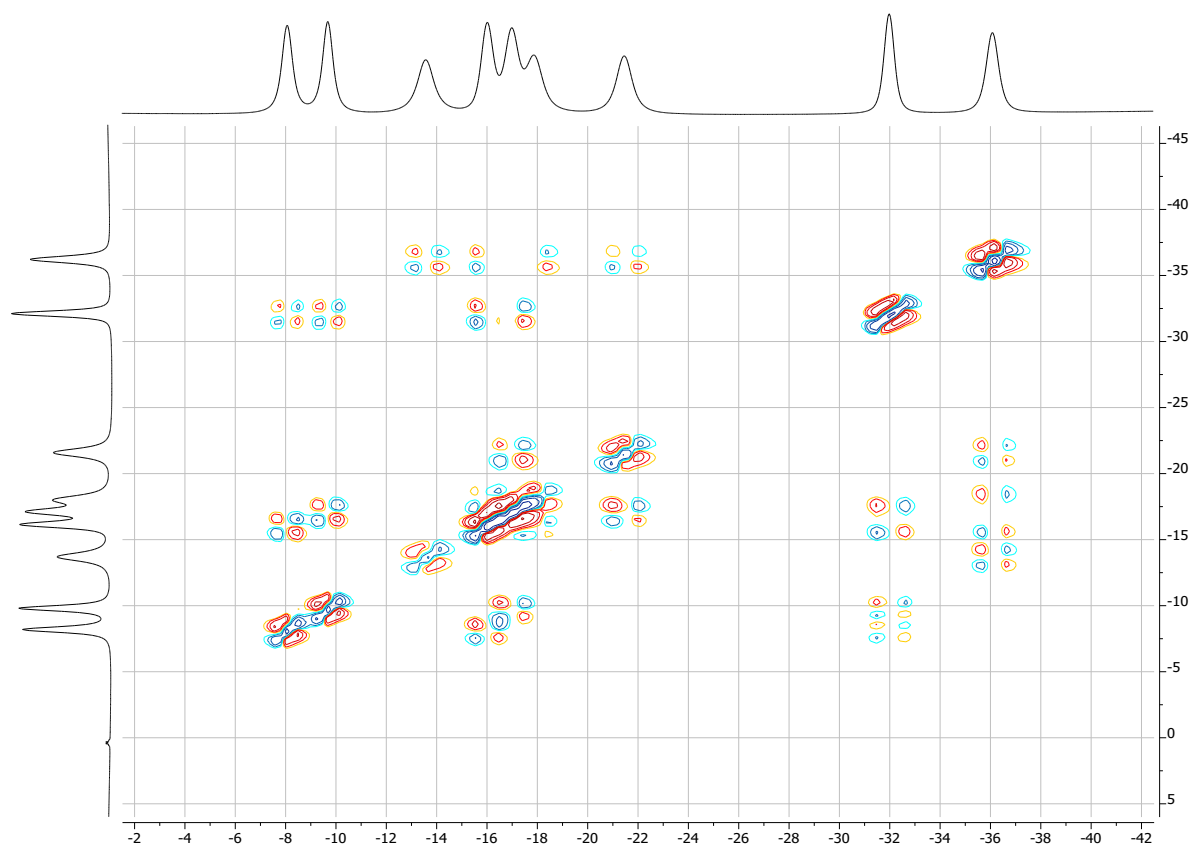

Figure S20. (BB) DQCOSY NMR spectrum of Cs[3] in acetone-d<sub>6</sub>

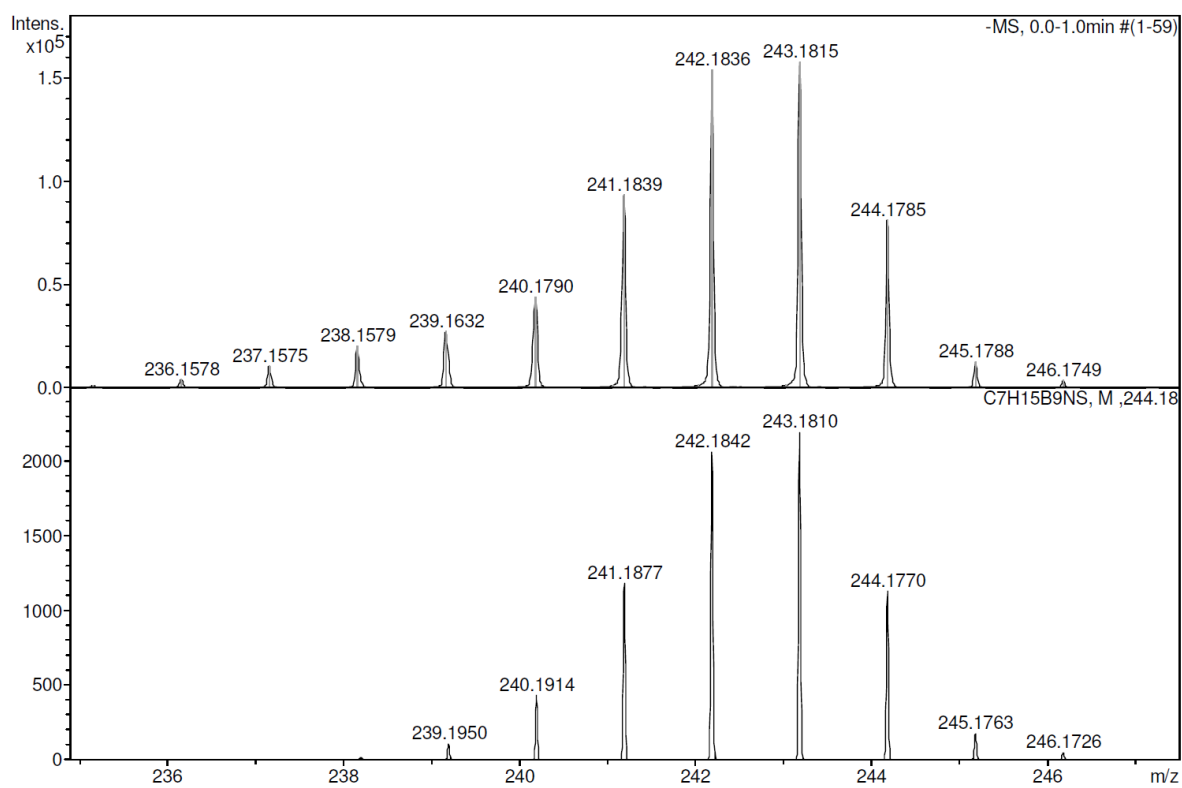

Figure S21. HRMS spectrum of Cs[3]

Spectral data for 1-(NC<sub>5</sub>H<sub>4</sub>-2'-CH<sub>2</sub>S)-1,2-C<sub>2</sub>B<sub>10</sub>H<sub>11</sub> (**4**)

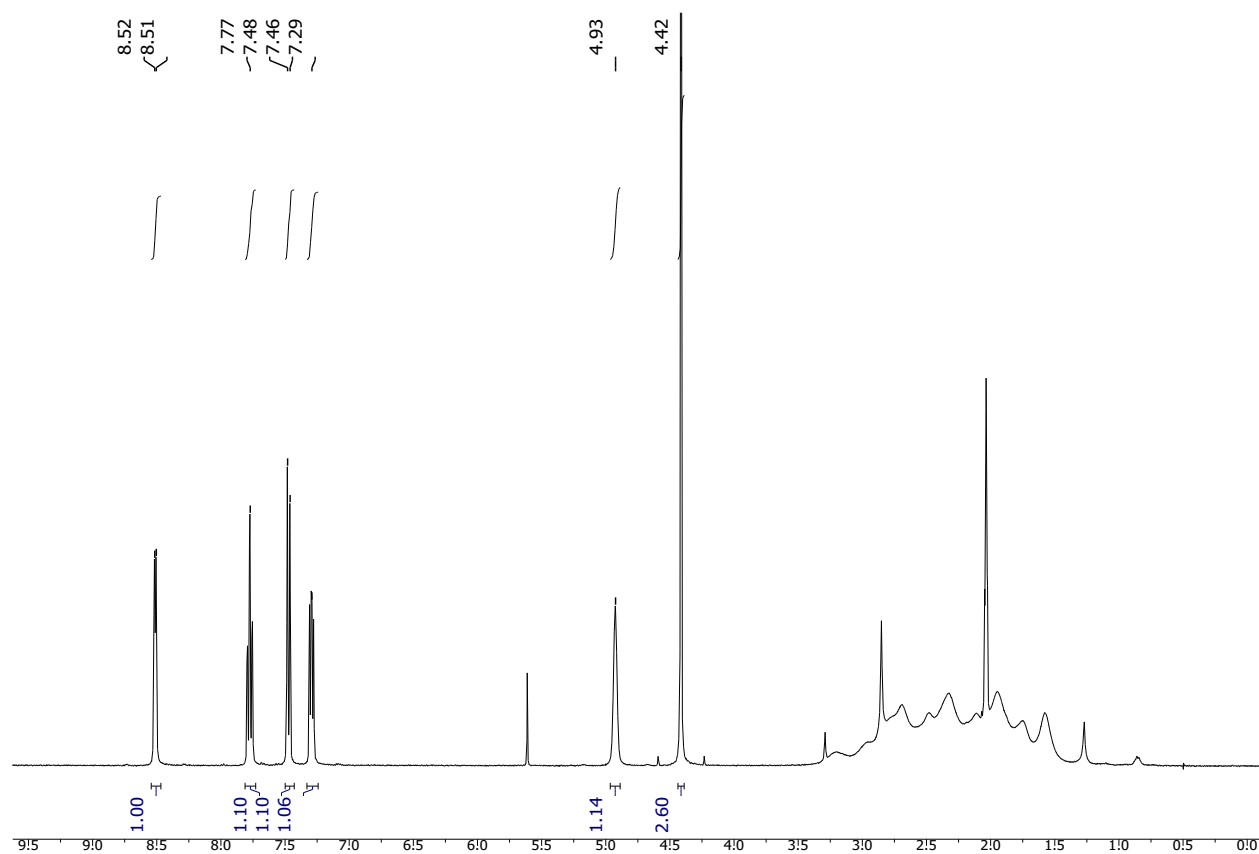

Figure S22. <sup>1</sup>H NMR spectrum of **4** in acetone-d<sub>6</sub>

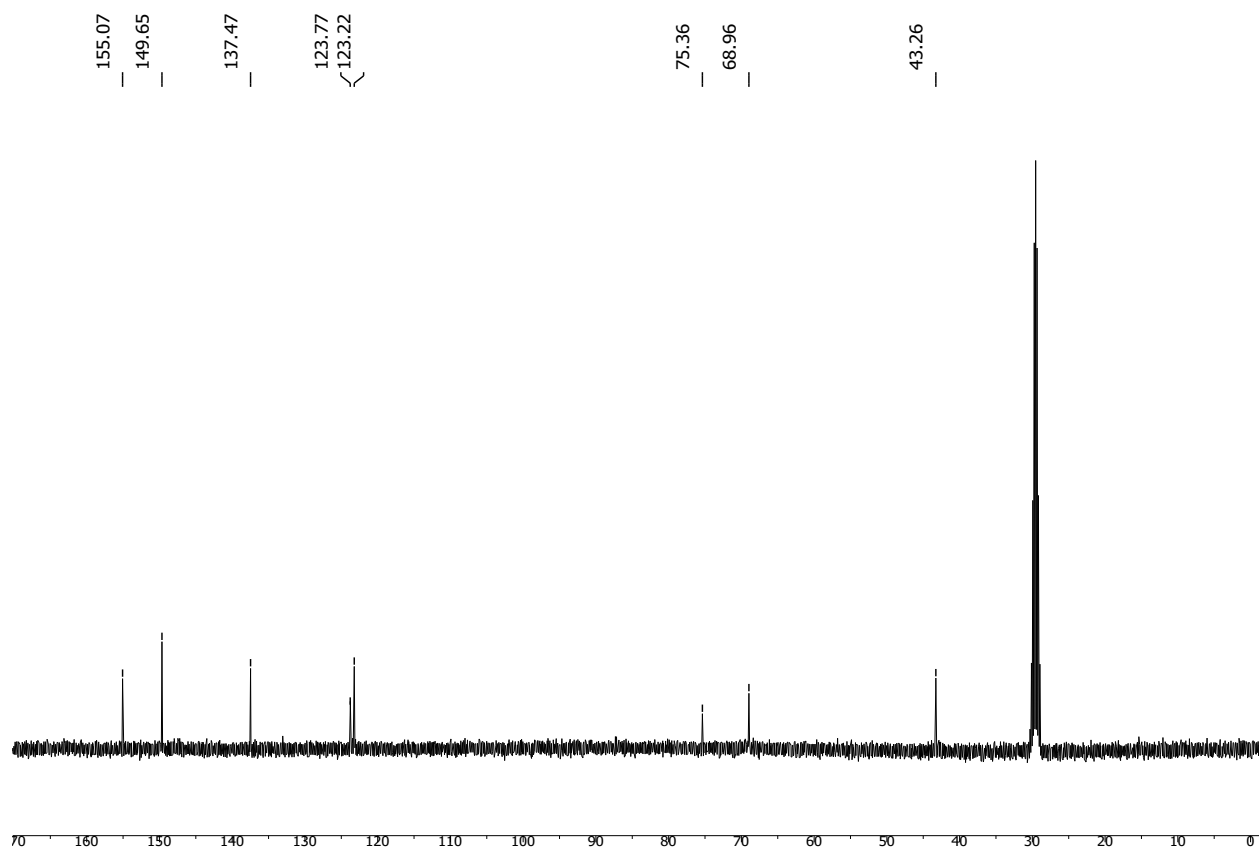

Figure S23. <sup>13</sup>C NMR spectrum of **4** in acetone-d<sub>6</sub>

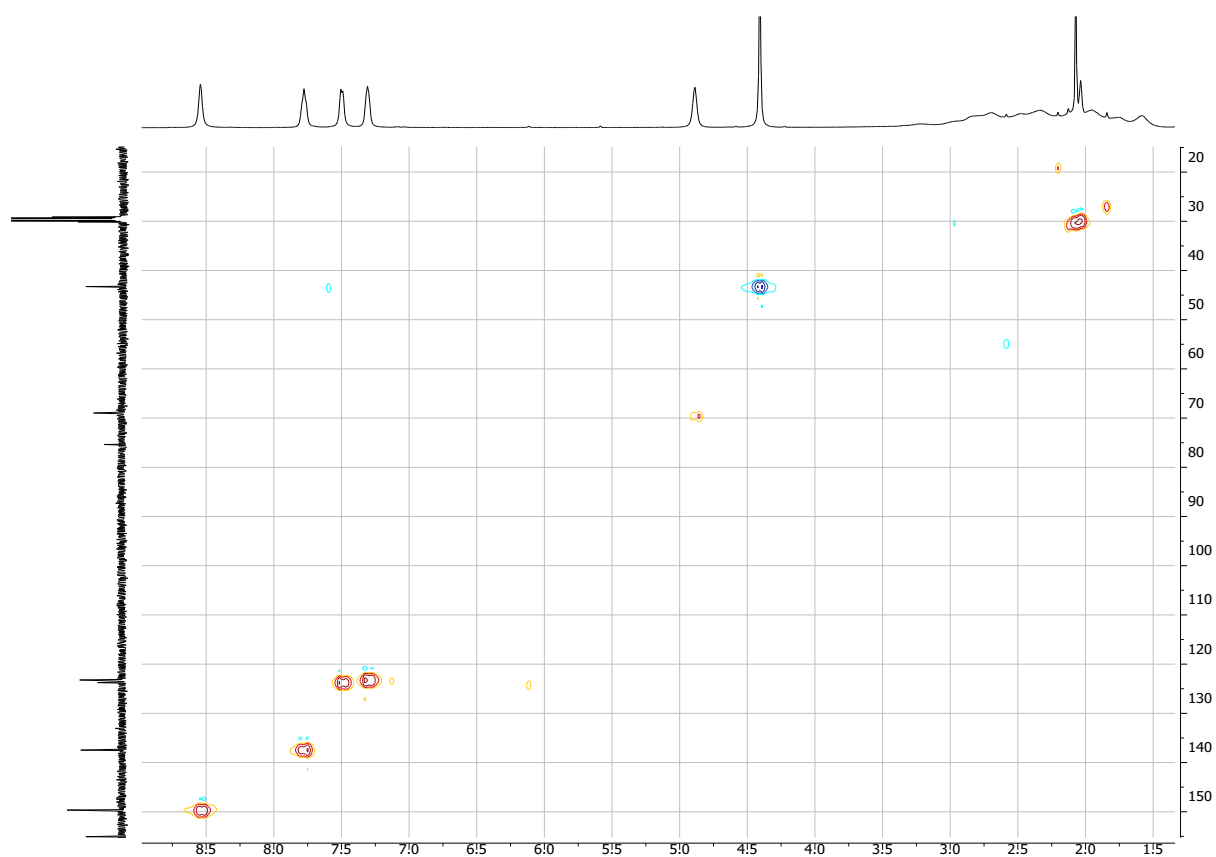

Figure S24. (HC) HSQC NMR spectrum of **4** in acetone- $d_6$

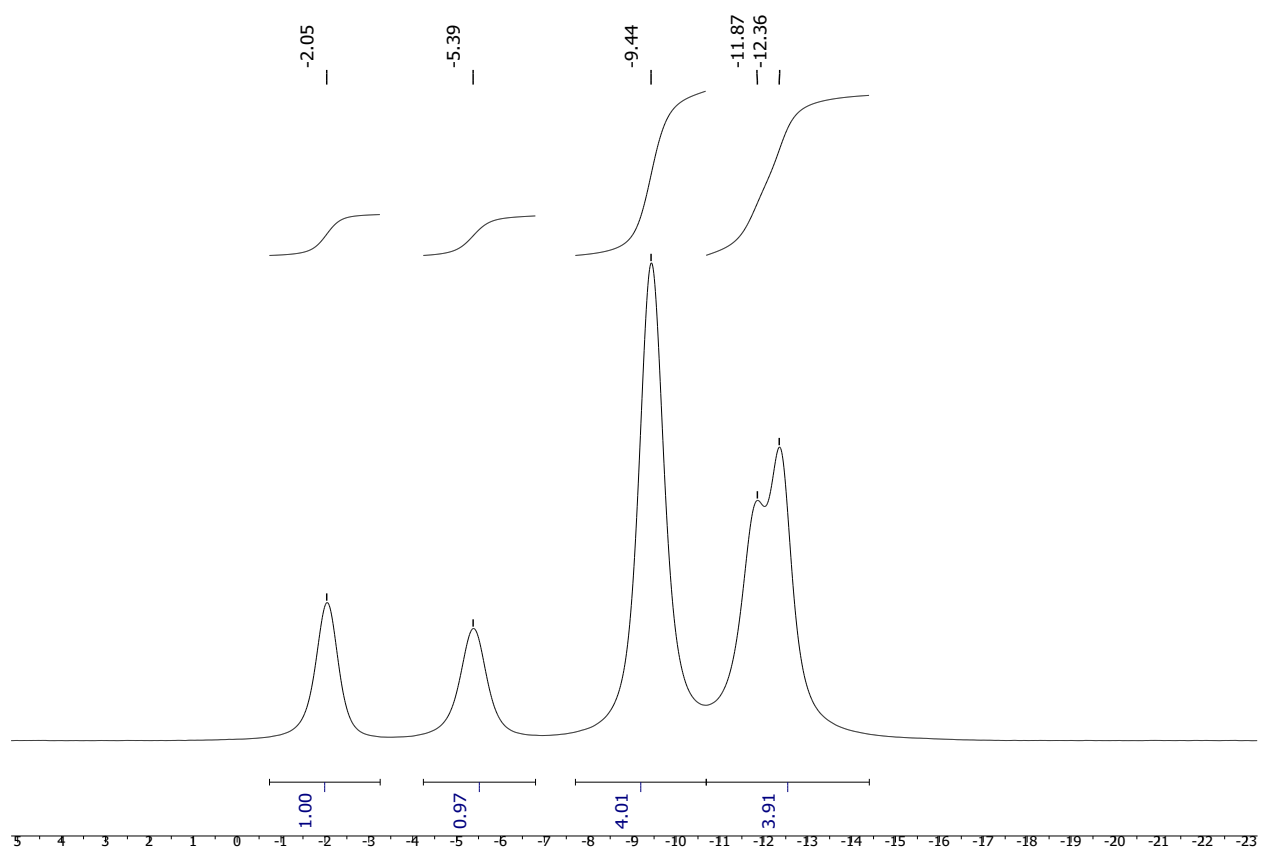

Figure S25.  $^{11}\text{B}\{^1\text{H}\}$  NMR spectrum of **4** in acetone- $d_6$

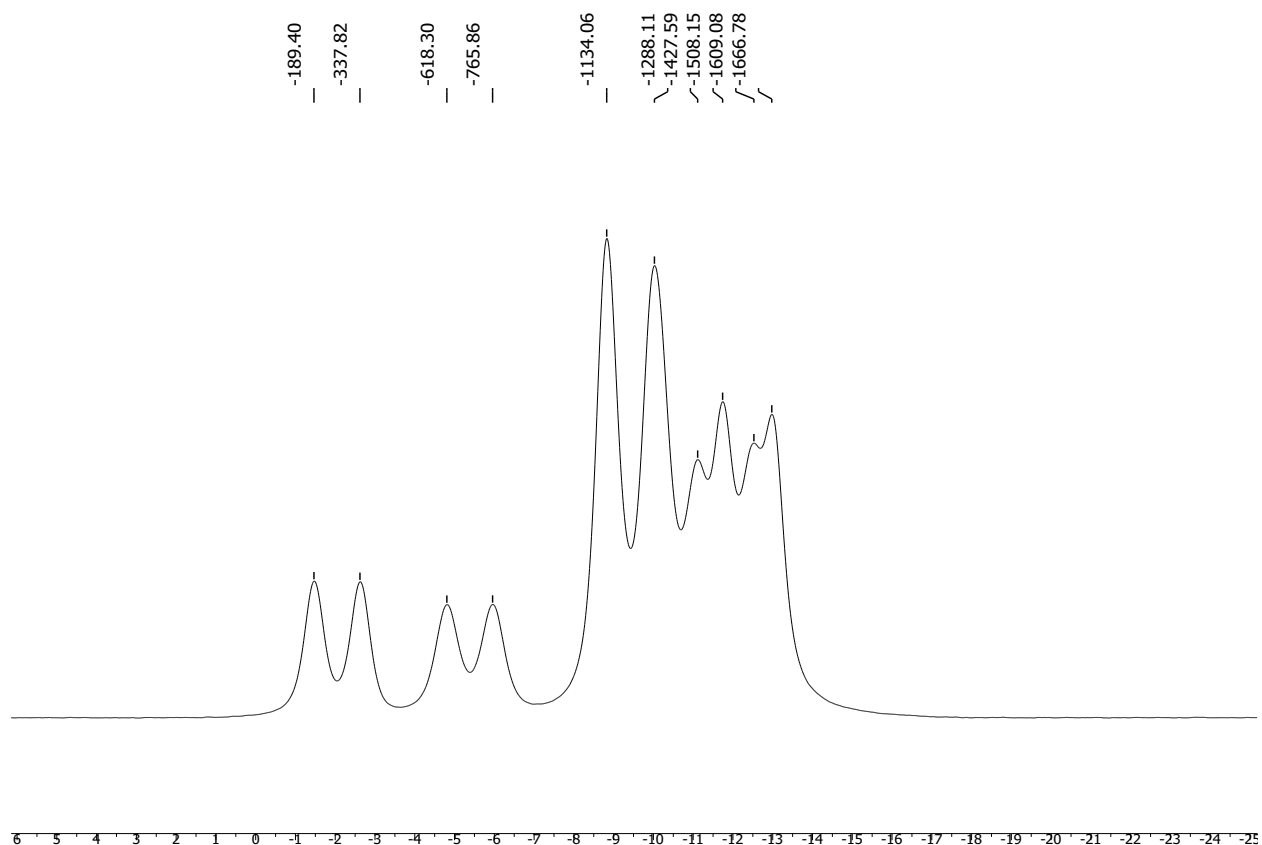

Figure S26.  $^{11}\text{B}$  NMR spectrum of **4** in acetone- $\text{d}_6$

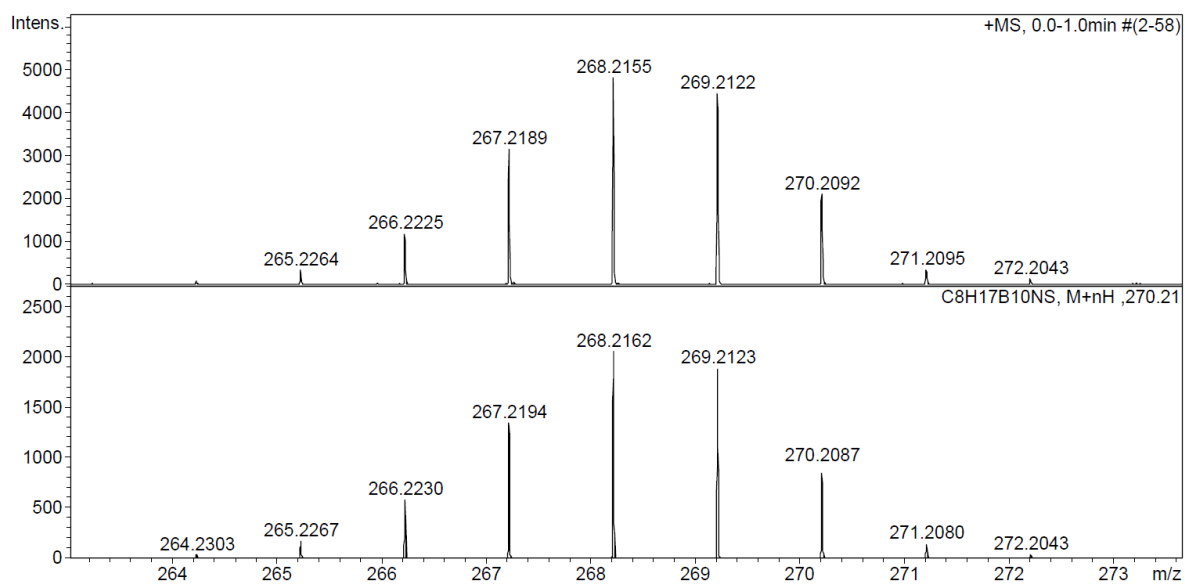

Figure S27. HRMS spectrum of **4**



Spectral data for Cs[7-(NC<sub>5</sub>H<sub>4</sub>-2'-CH<sub>2</sub>S)-7,8-C<sub>2</sub>B<sub>9</sub>H<sub>11</sub>] (**5**)

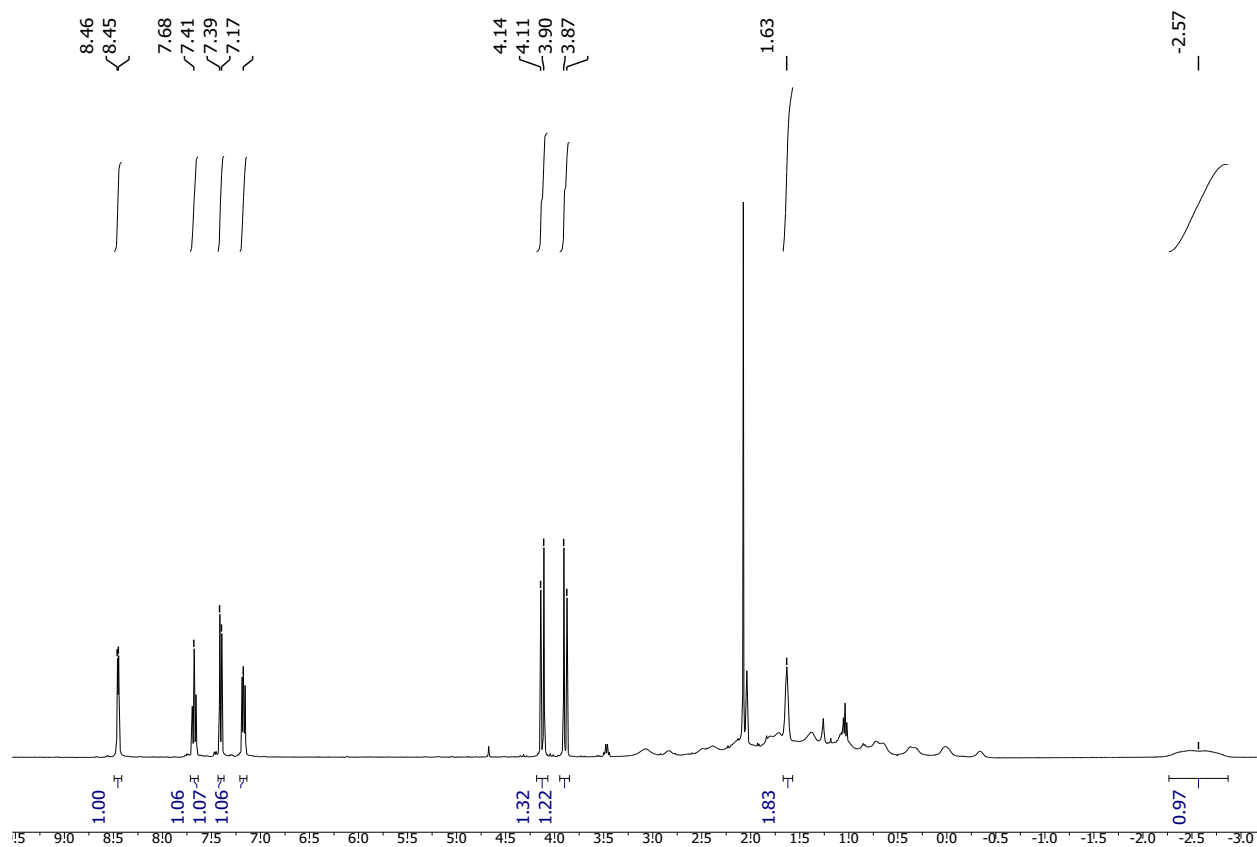

Figure S28. <sup>1</sup>H NMR spectrum of **5** in acetone-d<sub>6</sub>

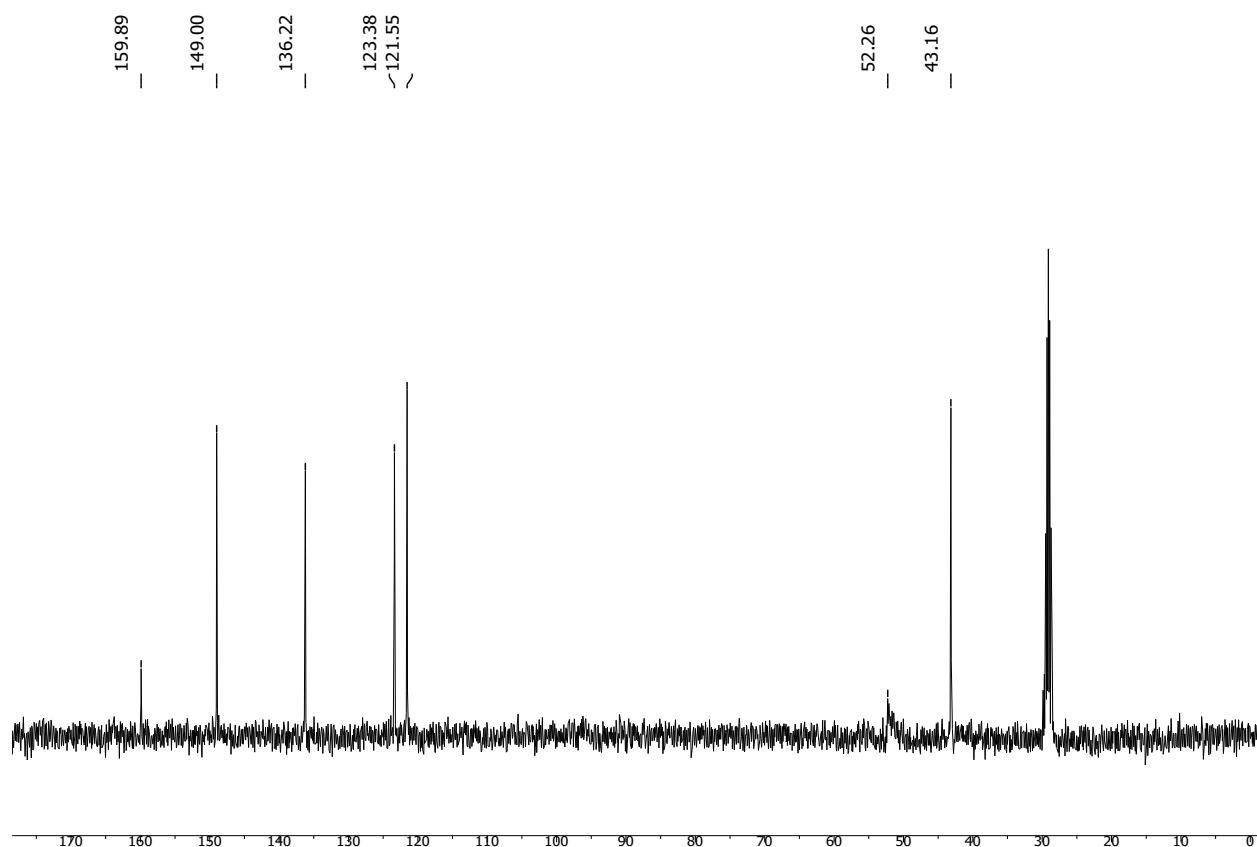

Figure S29. <sup>13</sup>C NMR spectrum of **5** in acetone-d<sub>6</sub>

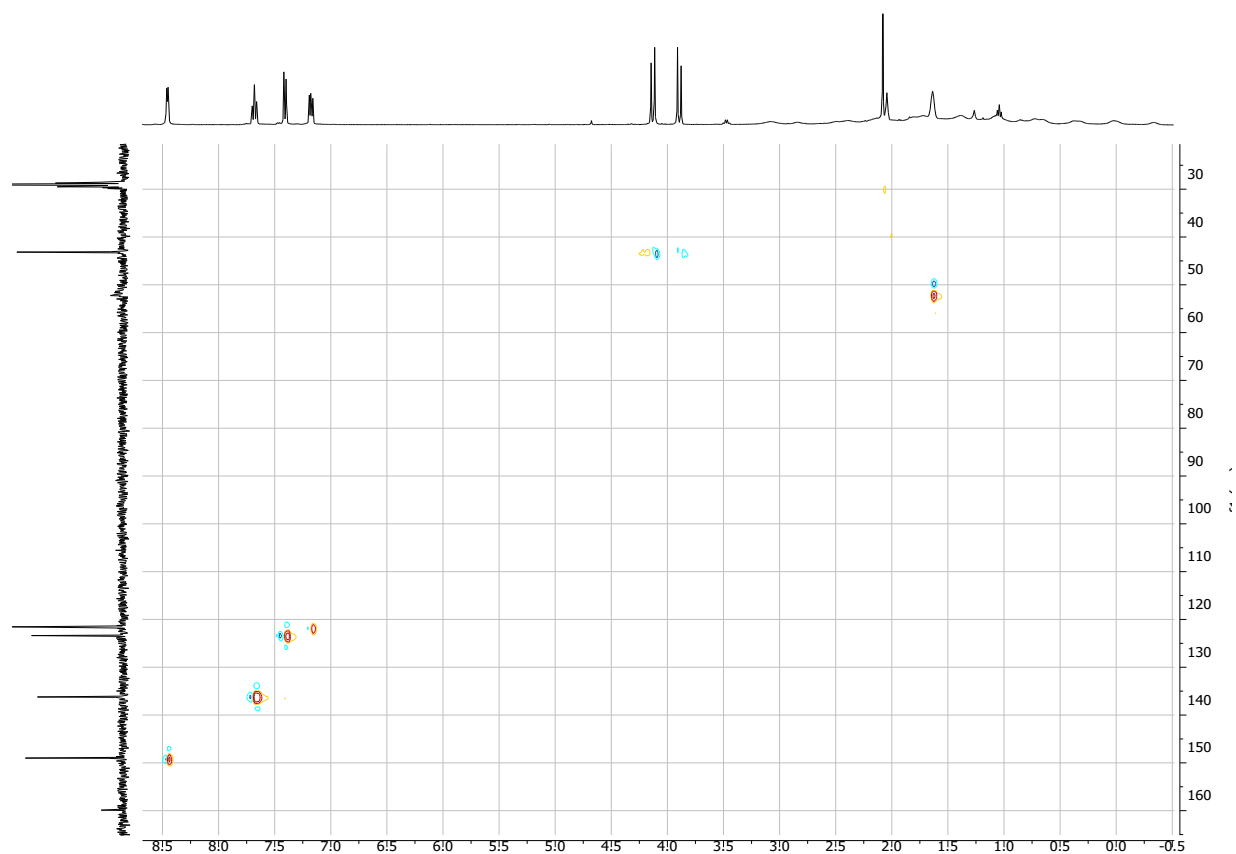

Figure S30. (HC) HSQC NMR spectrum of **5** in acetone- $d_6$

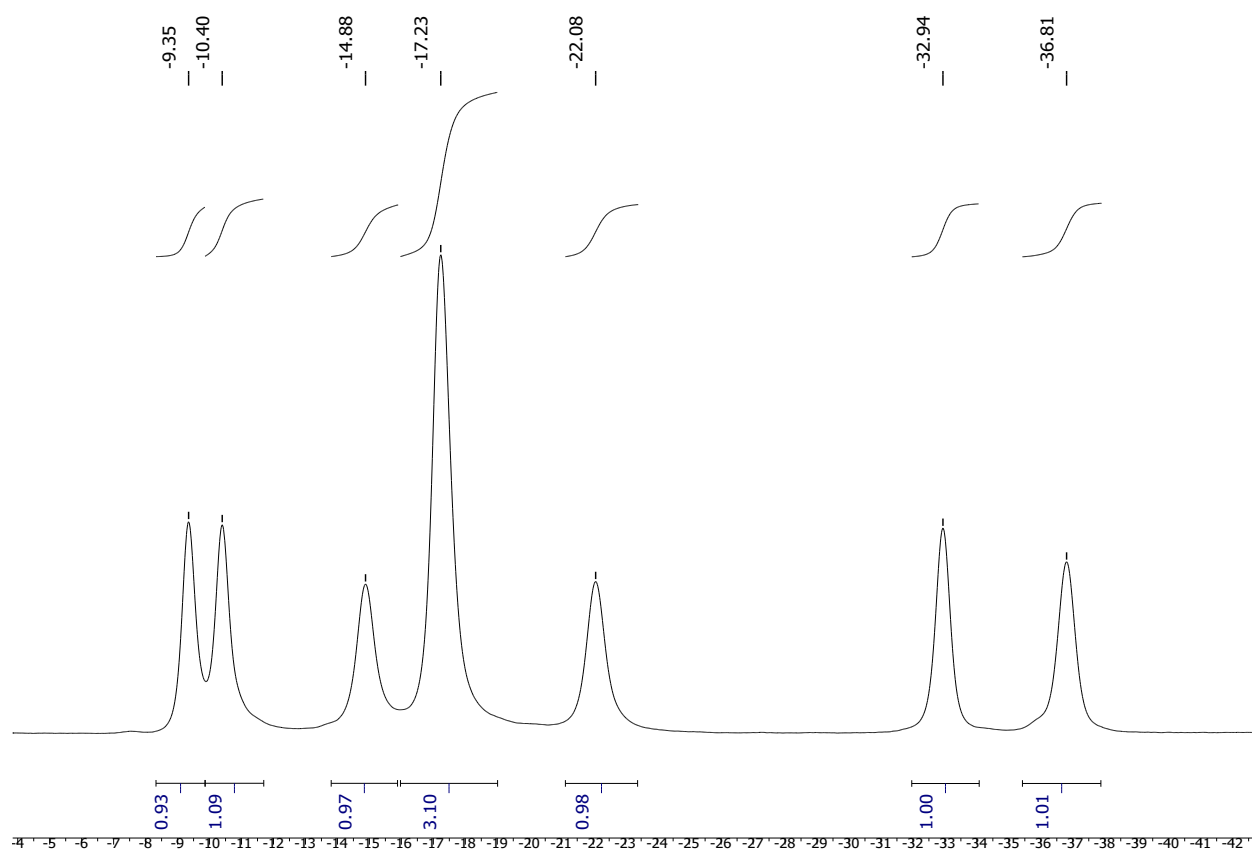

Figure S31.  $^{11}\text{B}\{^1\text{H}\}$  NMR spectrum of **5** in acetone- $d_6$

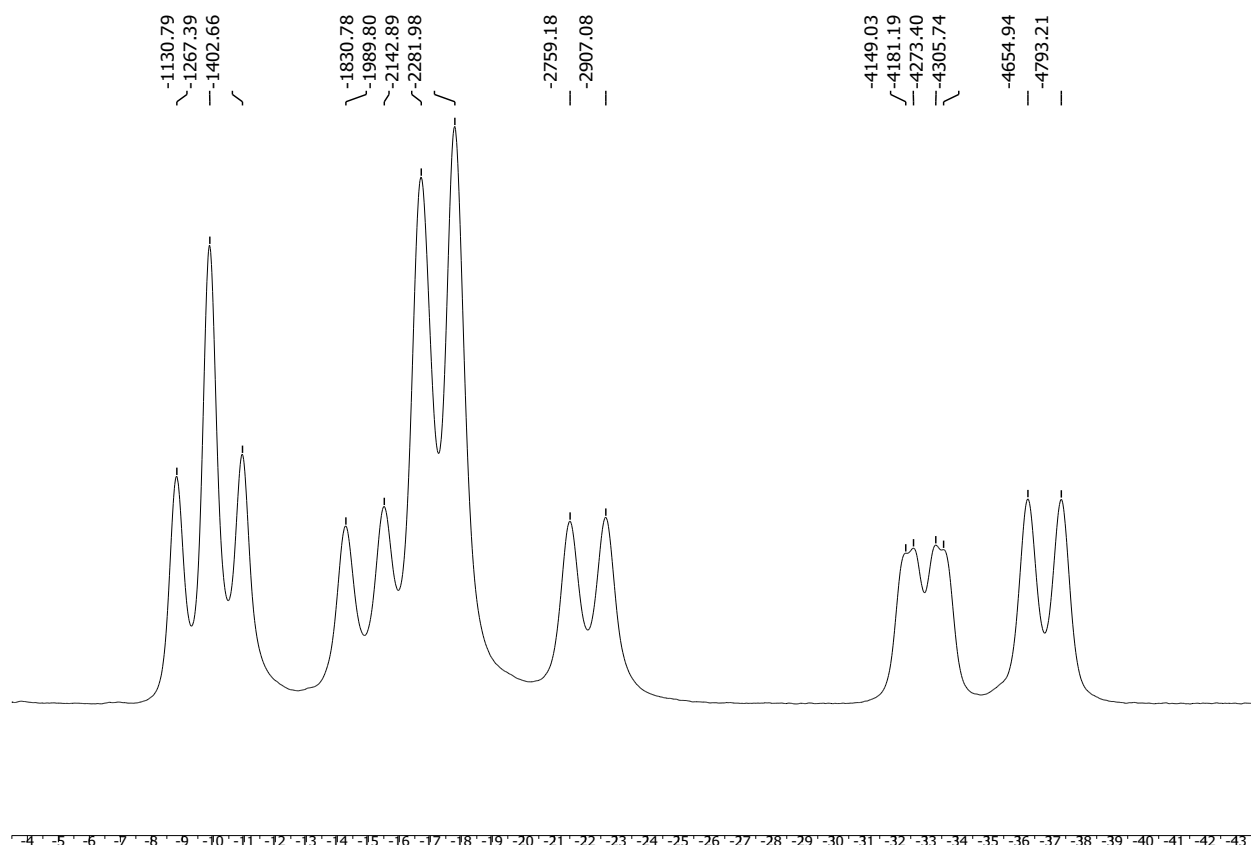

Figure S32.  $^{11}\text{B}$  NMR spectrum of **5** in acetone- $\text{d}_6$

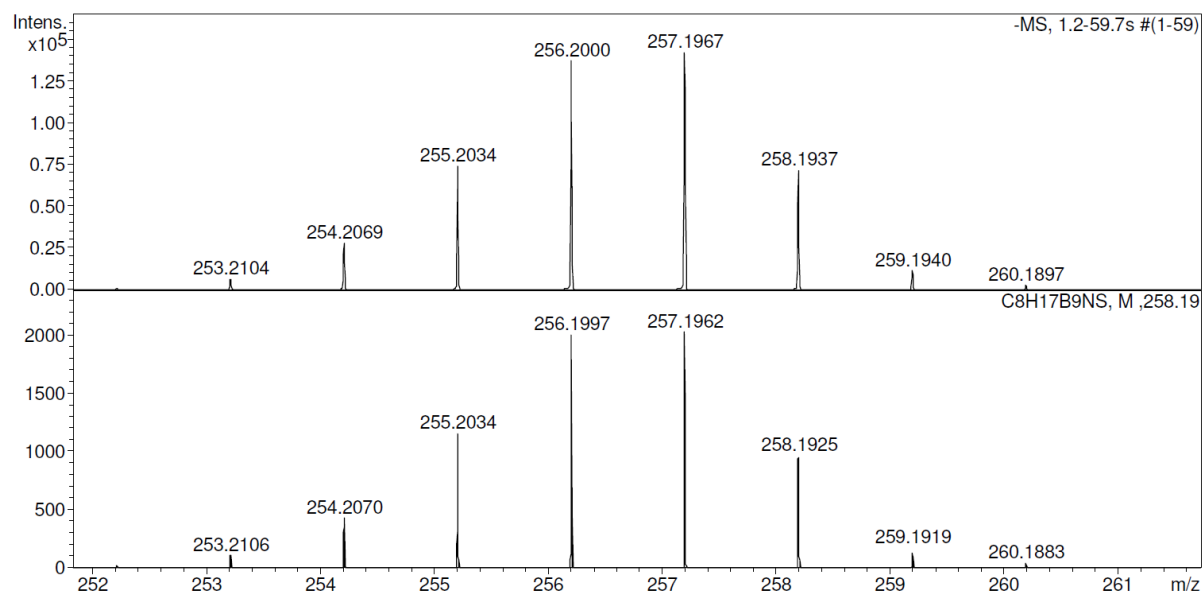

Figure S33. HRMS spectrum of **5**

Spectral data for 3-Ph<sub>3</sub>P-3-(4(7)-NC<sub>5</sub>H<sub>4</sub>-2'-S)-*closo*-3,1,2-NiC<sub>2</sub>B<sub>9</sub>H<sub>10</sub> (**6**)

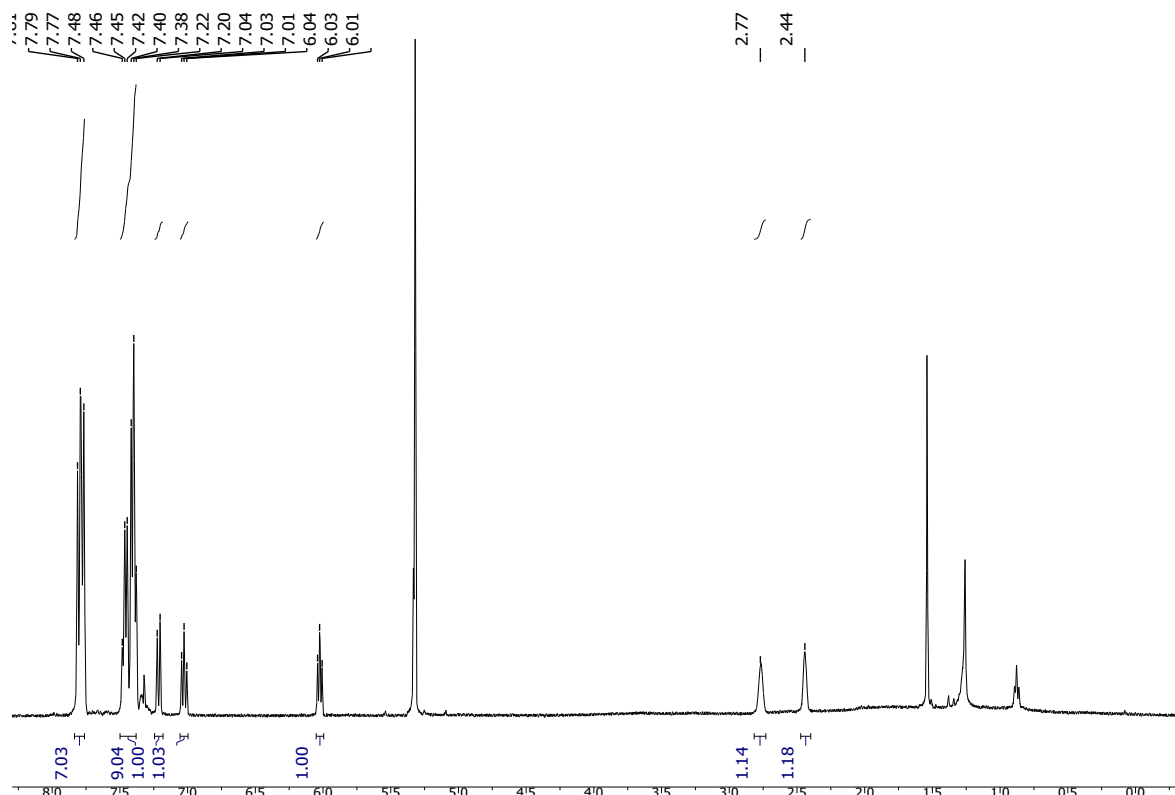

Figure S34. <sup>1</sup>H NMR spectrum of **6** in CD<sub>2</sub>Cl<sub>2</sub>

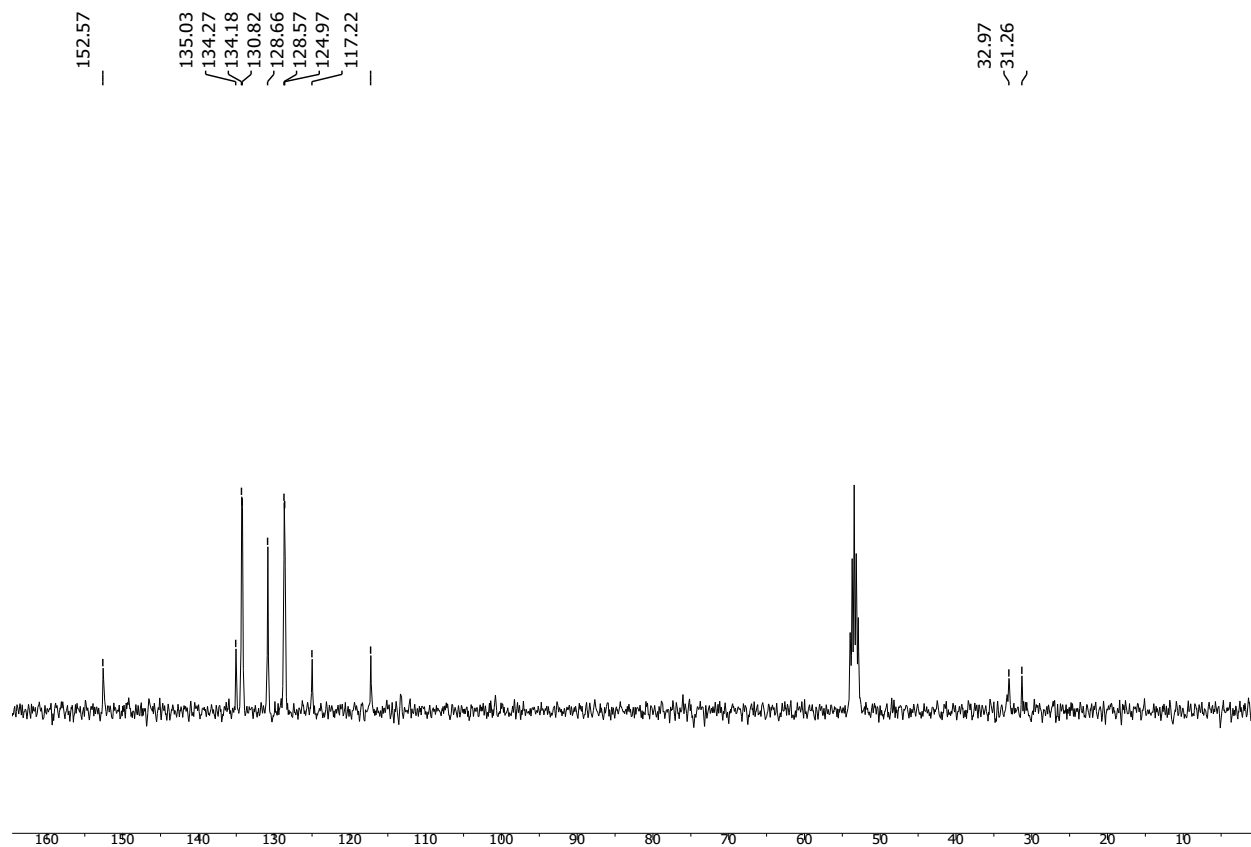

Figure S35. <sup>13</sup>C NMR spectrum of **6** in CD<sub>2</sub>Cl<sub>2</sub>

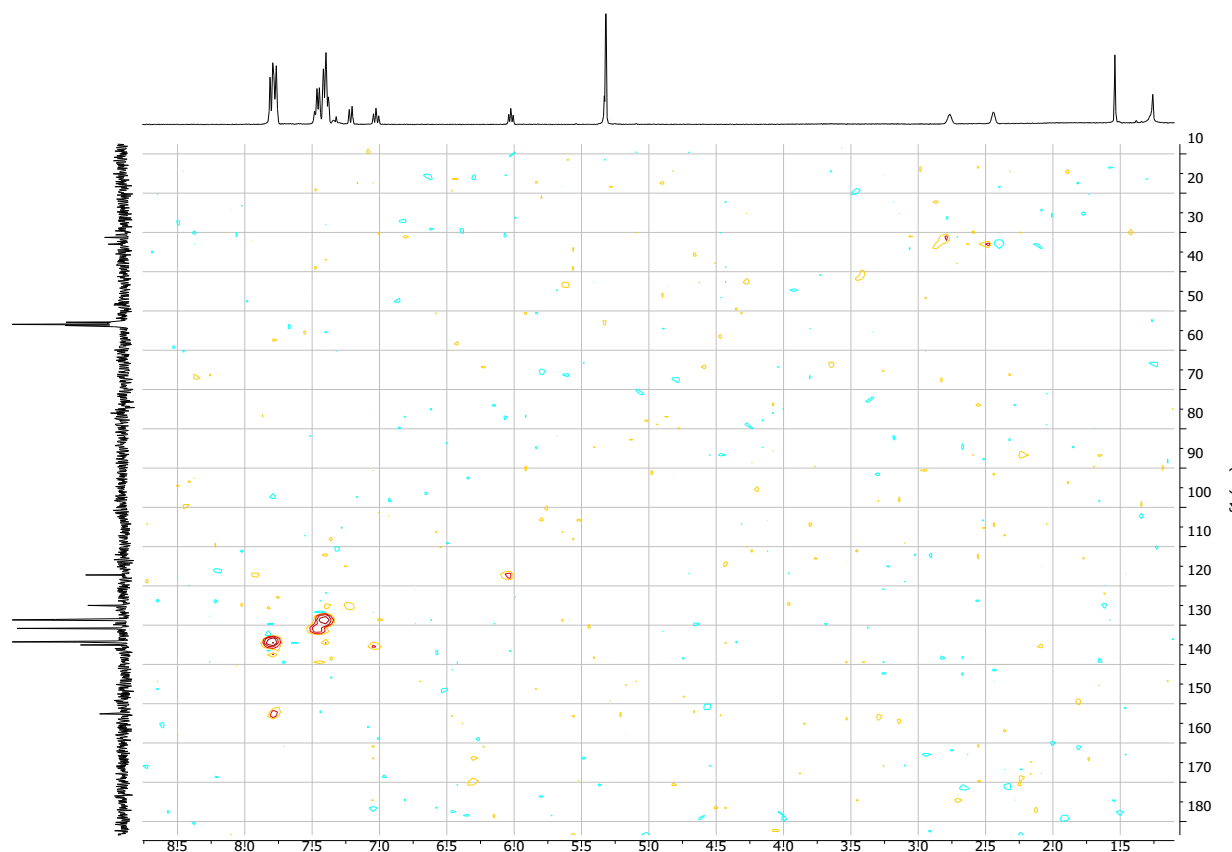

Figure S36. (HC) HSQC NMR spectrum of **6** in  $\text{CD}_2\text{Cl}_2$

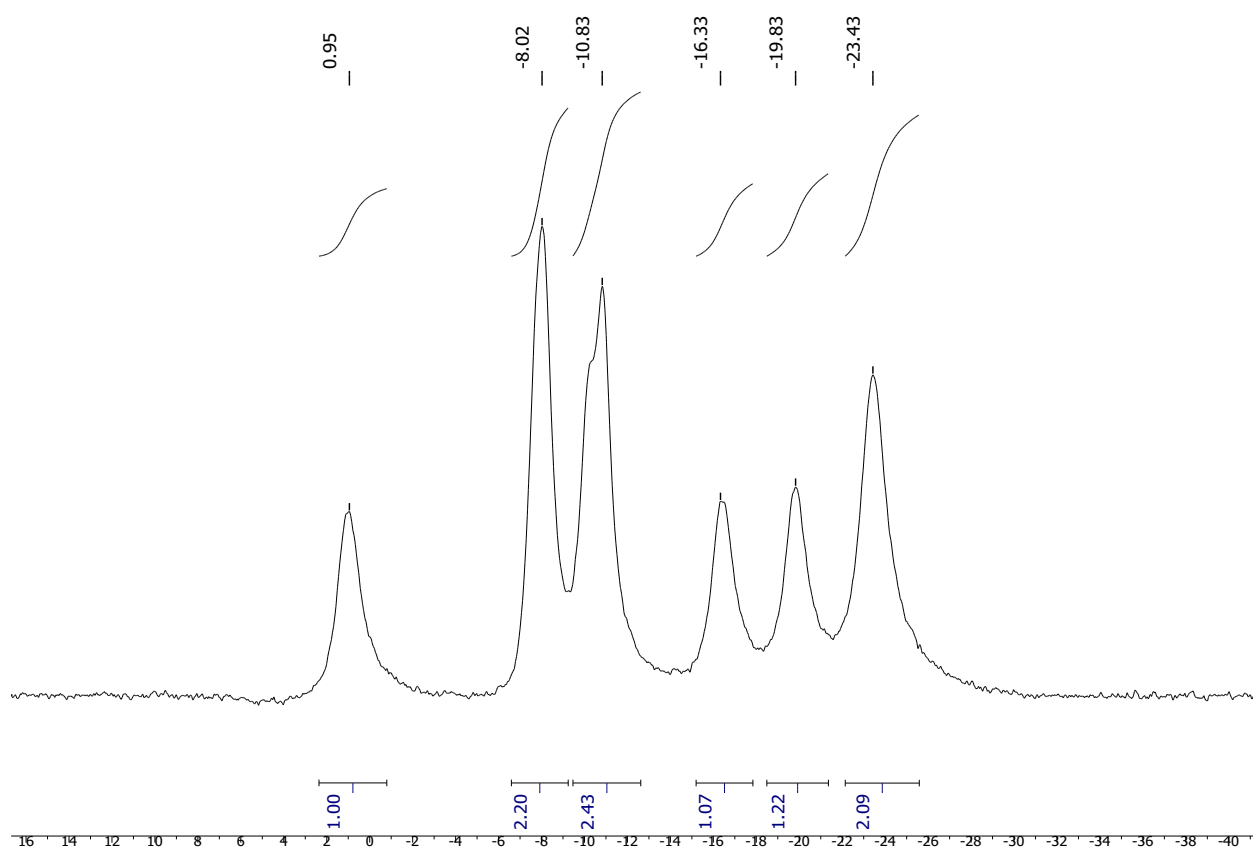

Figure S37.  $^{11}\text{B}\{^1\text{H}\}$  NMR spectrum of **6** in  $\text{CD}_2\text{Cl}_2$

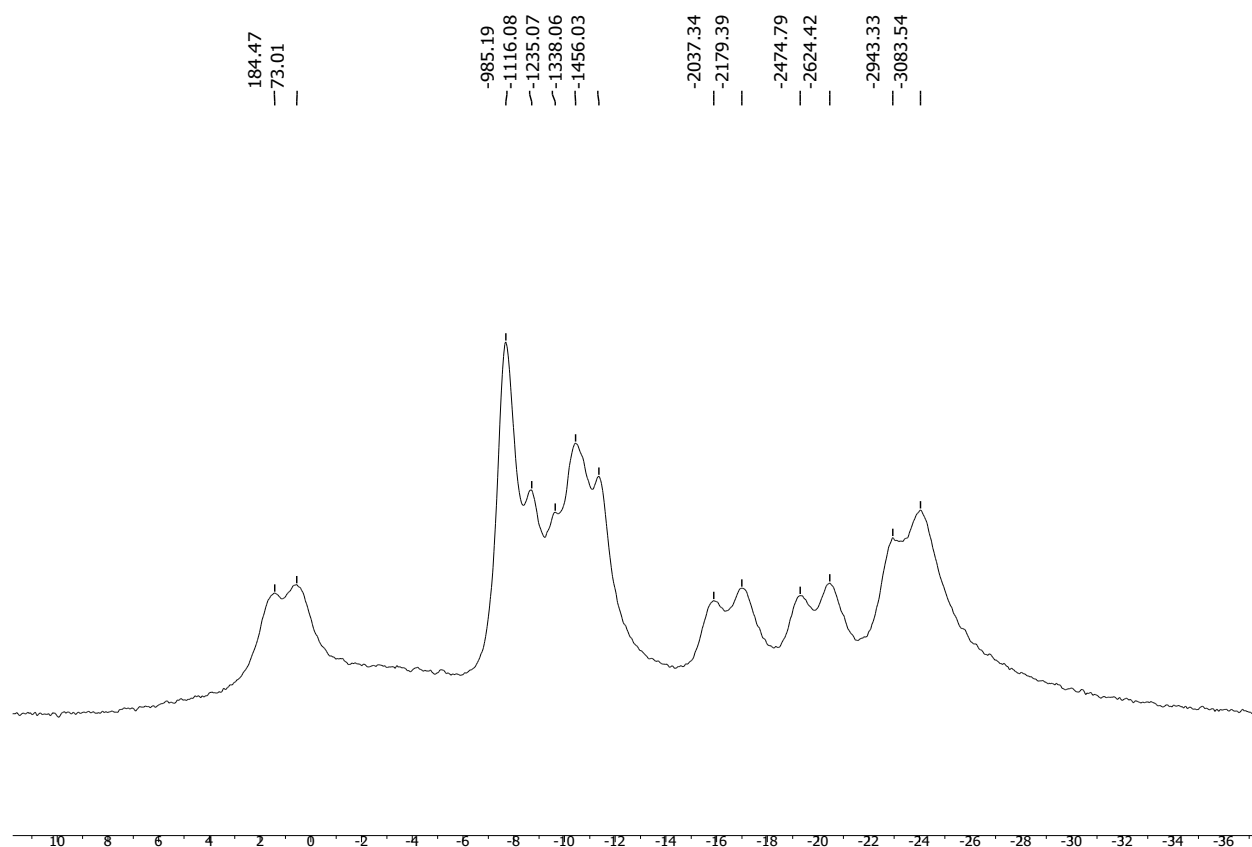

Figure S38.  $^{11}\text{B}$  NMR spectrum of **6** in  $\text{CD}_2\text{Cl}_2$

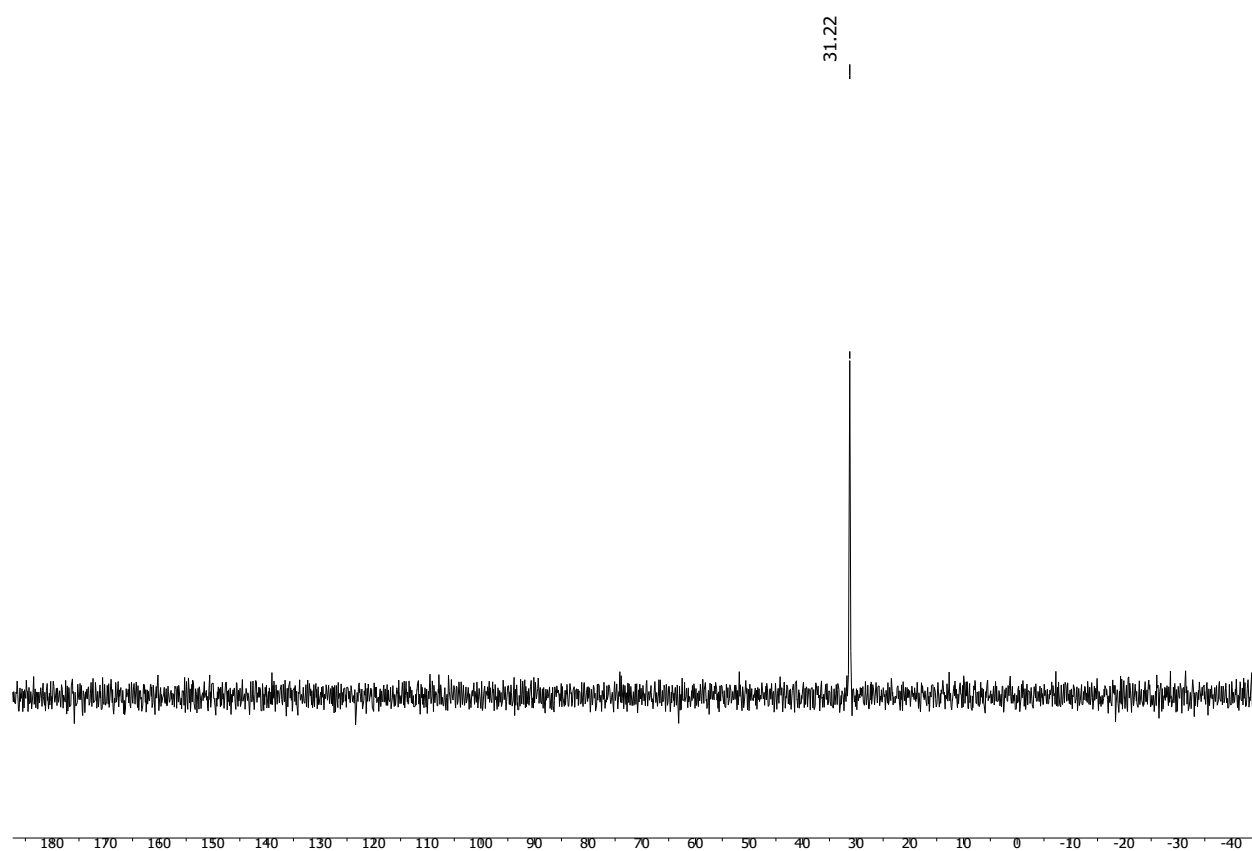

Figure S39.  $^{31}\text{P}$  NMR spectrum of **6** in  $\text{CD}_2\text{Cl}_2$

Spectral data for 3-Ph<sub>3</sub>P-3-(4(7)-NC<sub>5</sub>H<sub>4</sub>-2'-S)-*closo*-3,1,2-PdC<sub>2</sub>B<sub>9</sub>H<sub>10</sub> (**7**)

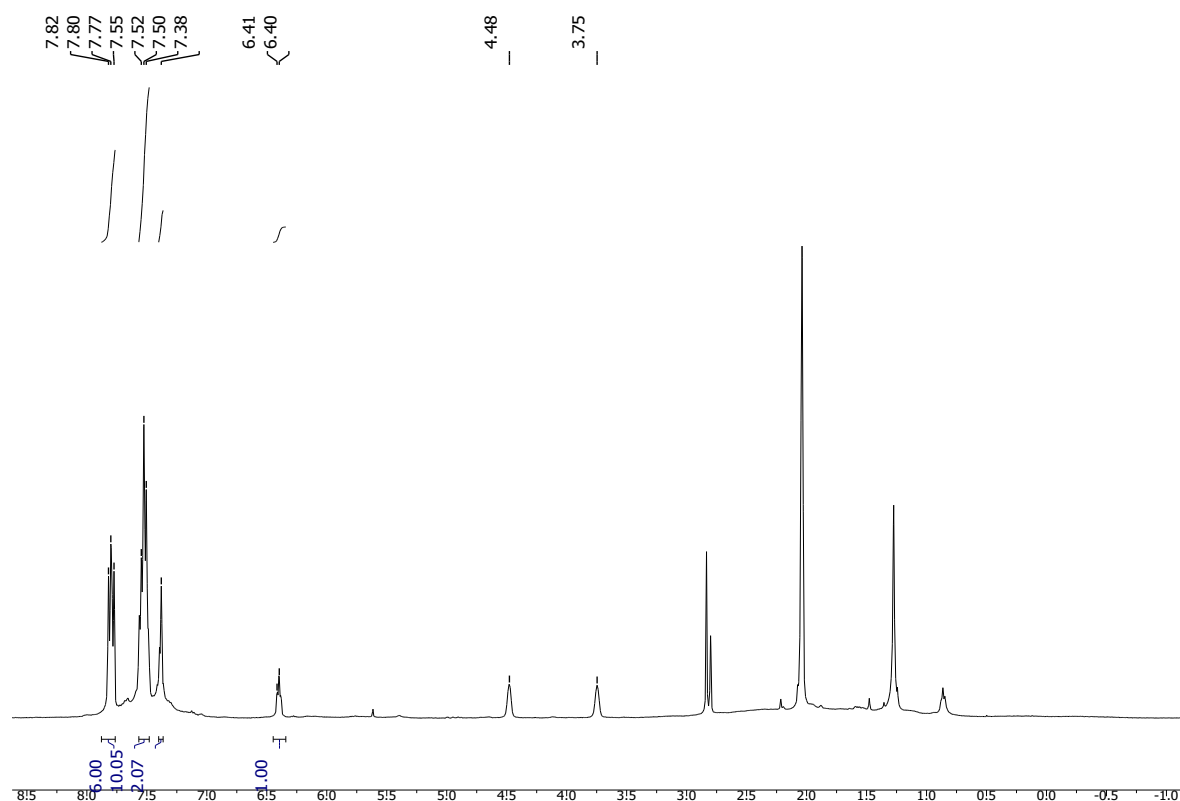

Figure S40. <sup>1</sup>H NMR spectrum of **7** in acetone-d<sub>6</sub>

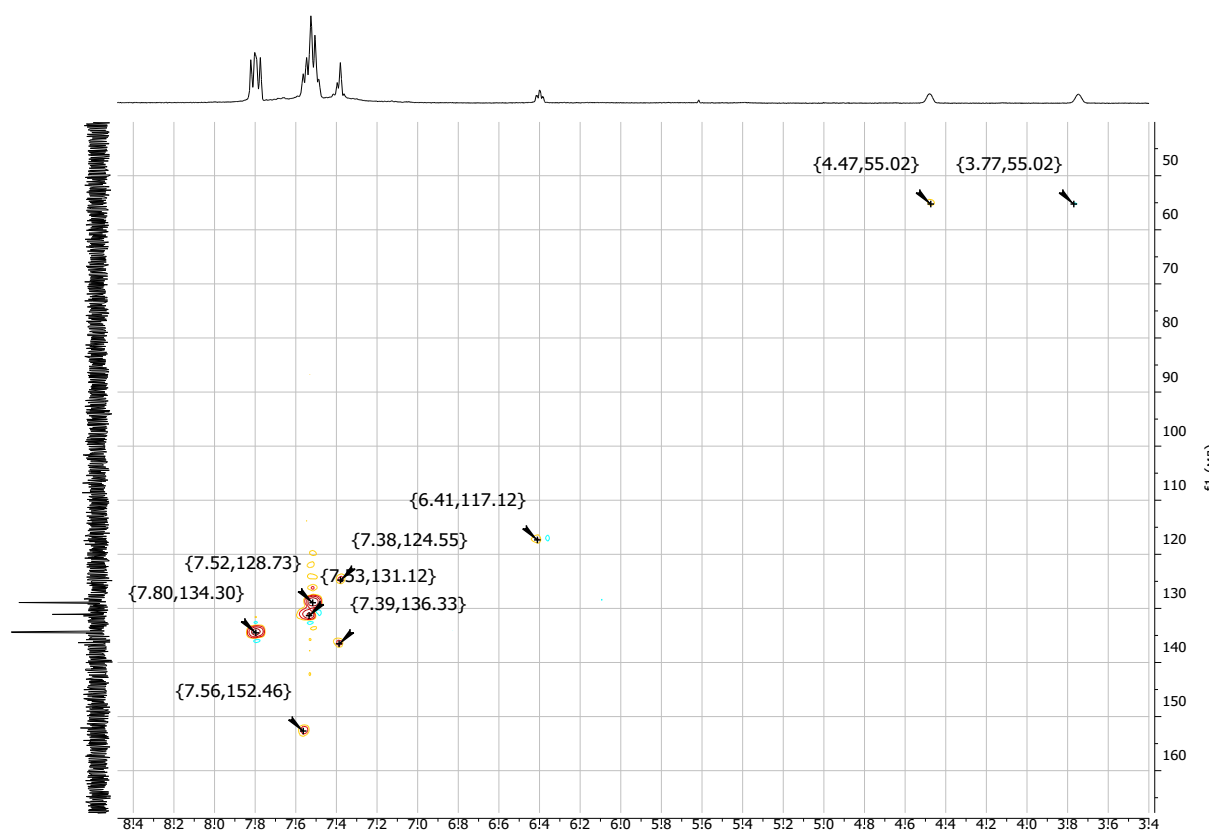

Figure S41. (H)C HSQC NMR spectrum of **7** in acetone-d<sub>6</sub>

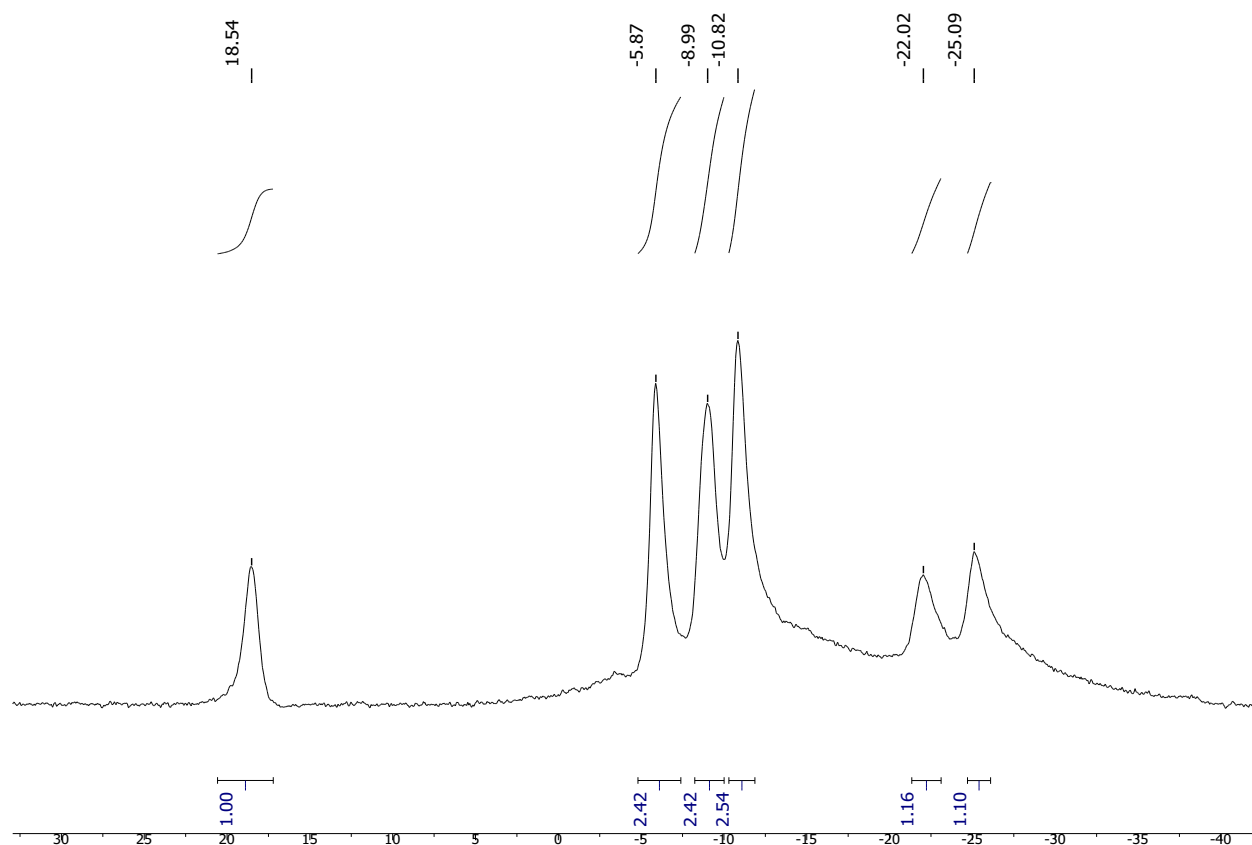

Figure S42.  $^{11}\text{B}\{^1\text{H}\}$  NMR spectrum of **7** in acetone- $\text{d}_6$

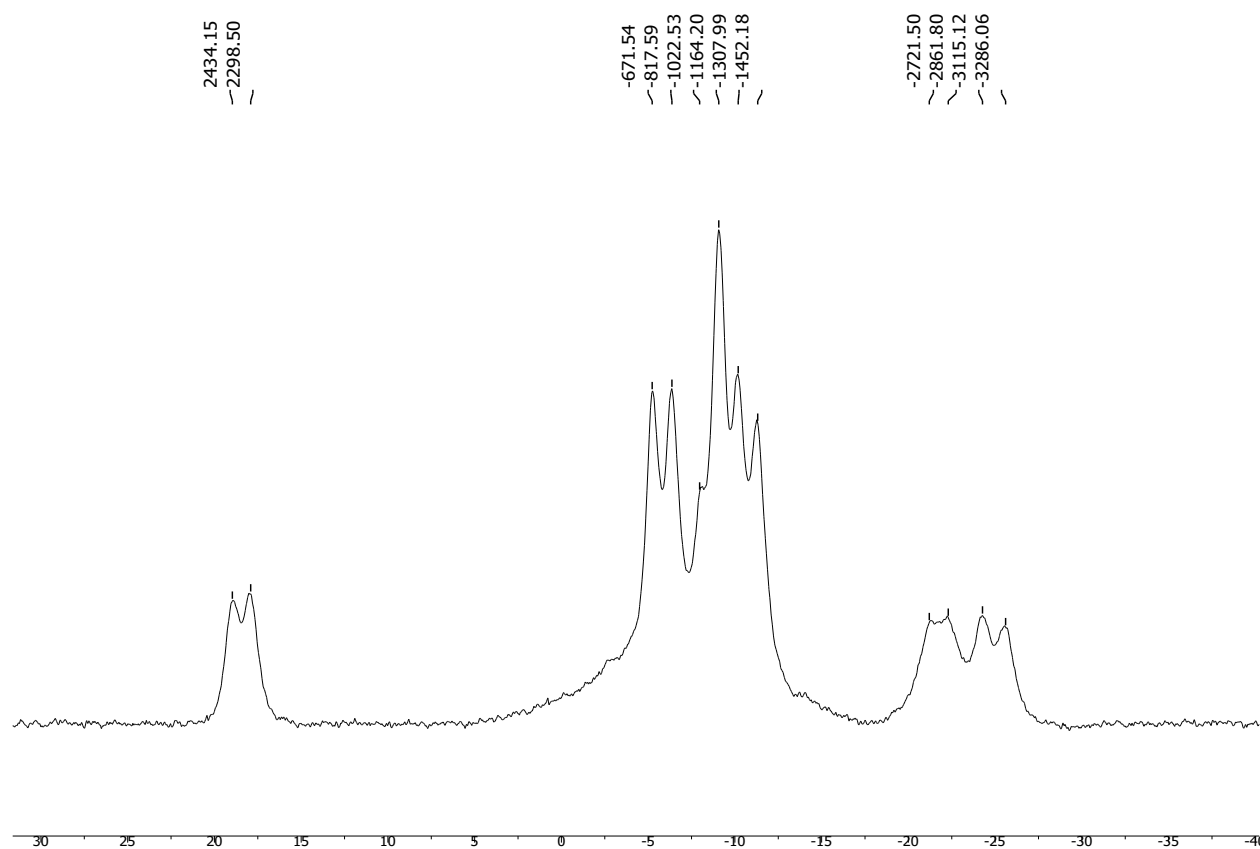

Figure S43.  $^{11}\text{B}$  NMR spectrum of **7** in acetone- $\text{d}_6$



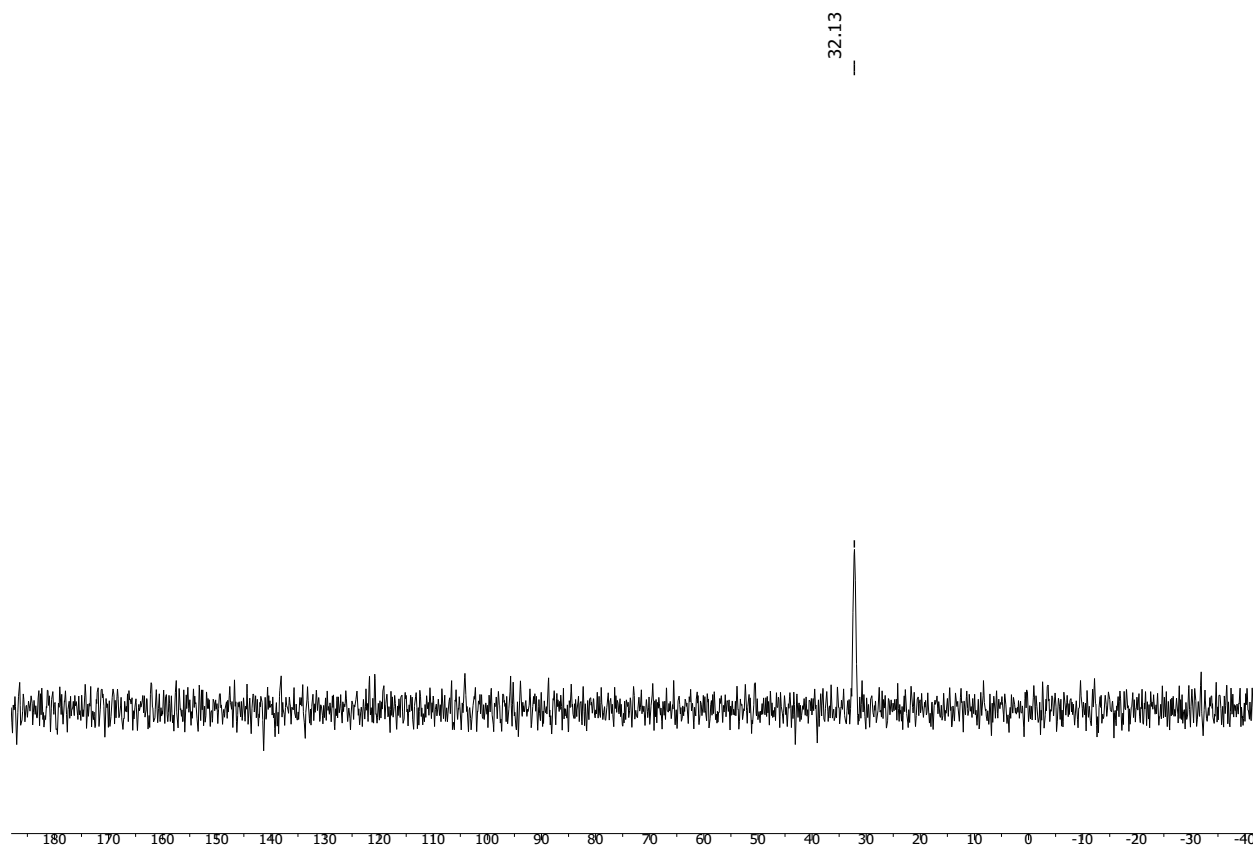

Figure S44.  $^{31}\text{P}$  NMR spectrum of **7** in acetone- $\text{d}_6$

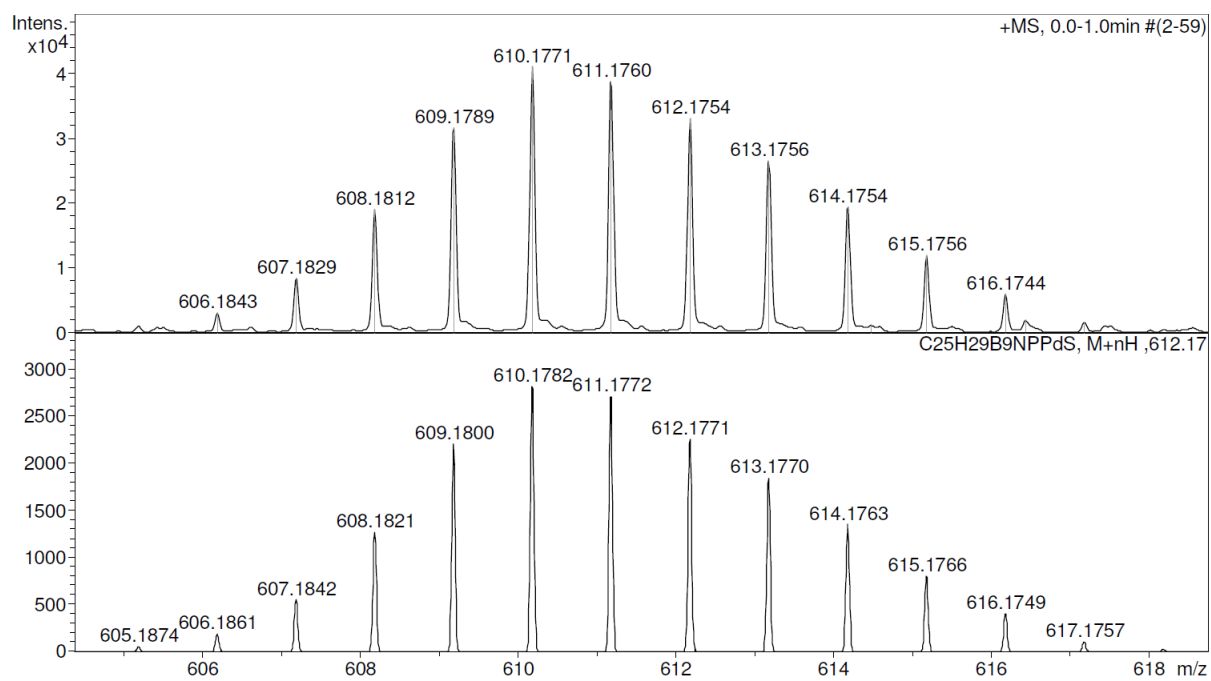

Figure S45. HRMS spectrum of **7**

Spectral data for 3-Ph<sub>3</sub>P-3-(1(2)-NC<sub>5</sub>H<sub>4</sub>-2'-S)-*closo*-3,1,2-NiC<sub>2</sub>B<sub>9</sub>H<sub>10</sub> (**8**)

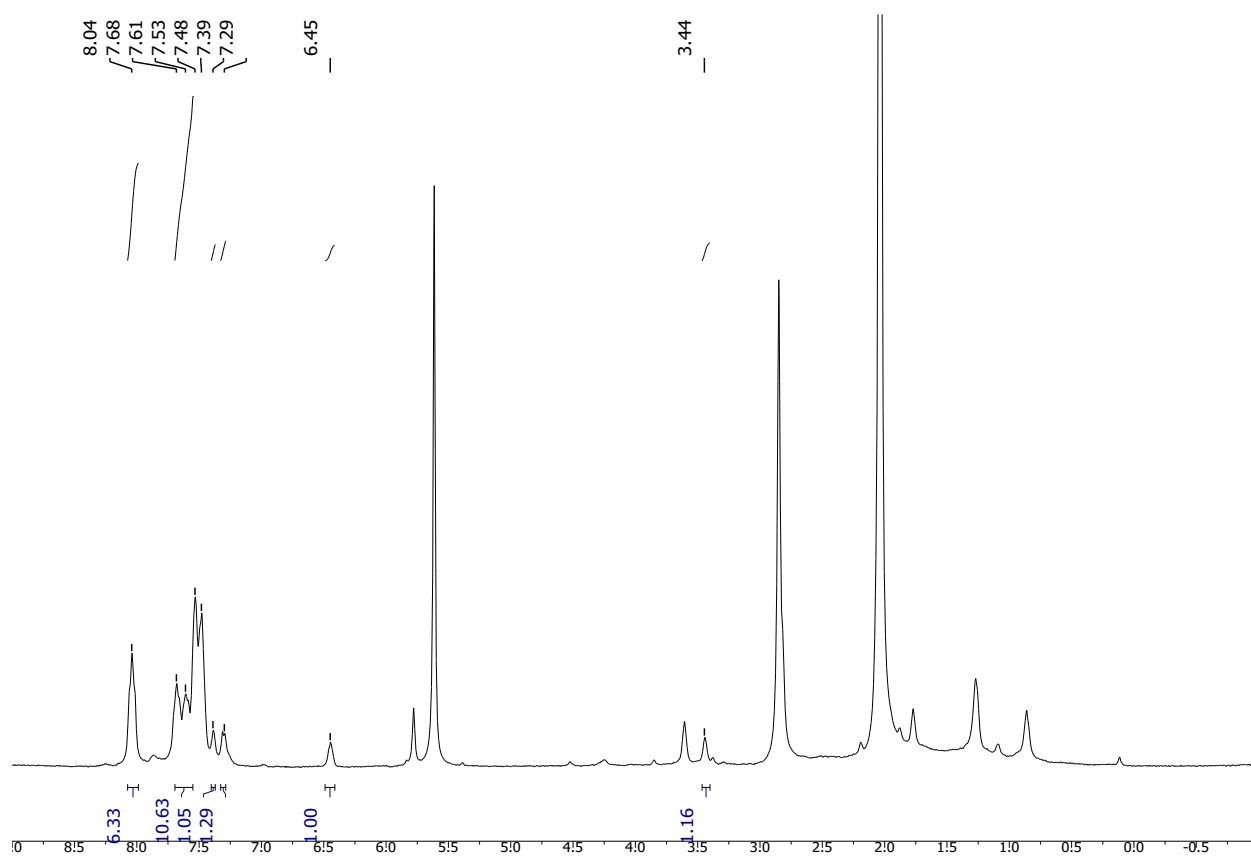

Figure S46. <sup>1</sup>H NMR spectrum of **8** in acetone-d<sub>6</sub>

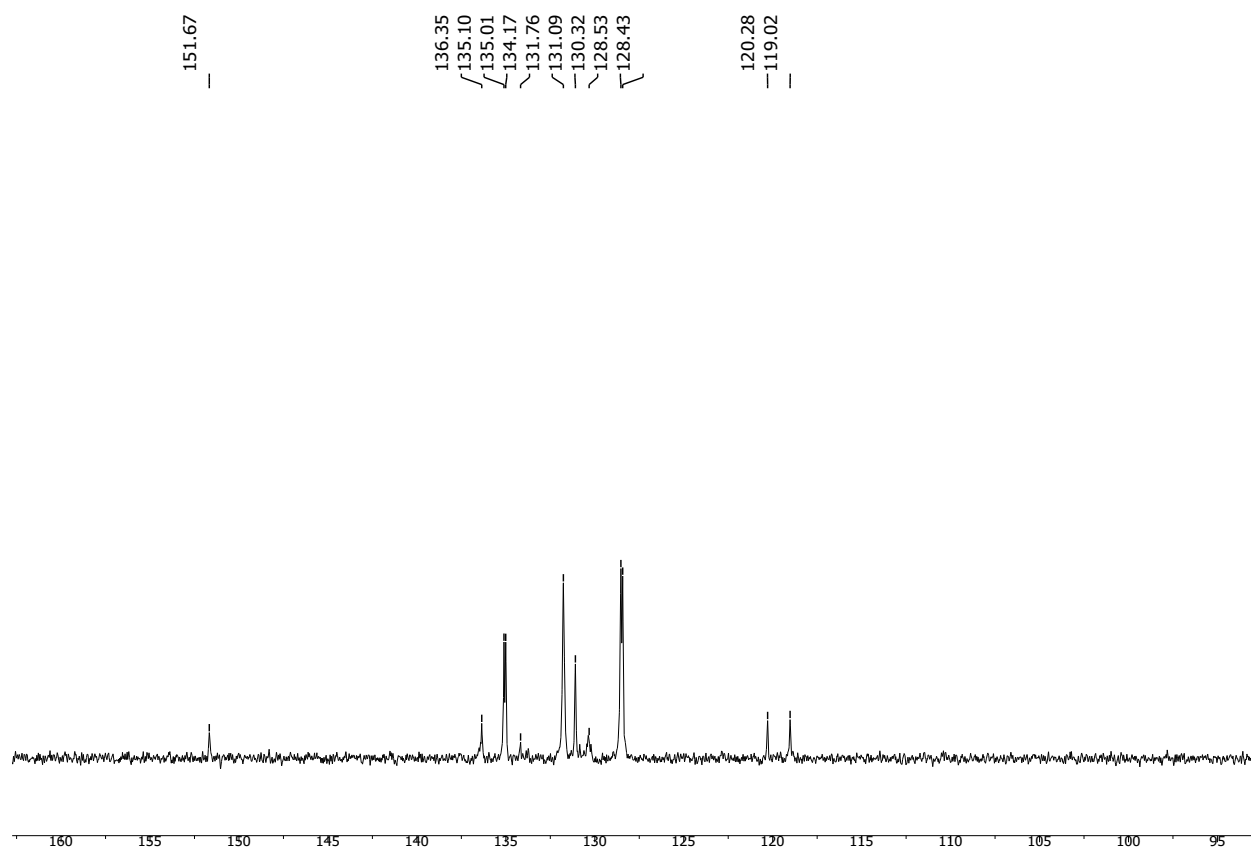

Figure S47. <sup>13</sup>C NMR spectrum of **8** in acetone-d<sub>6</sub>

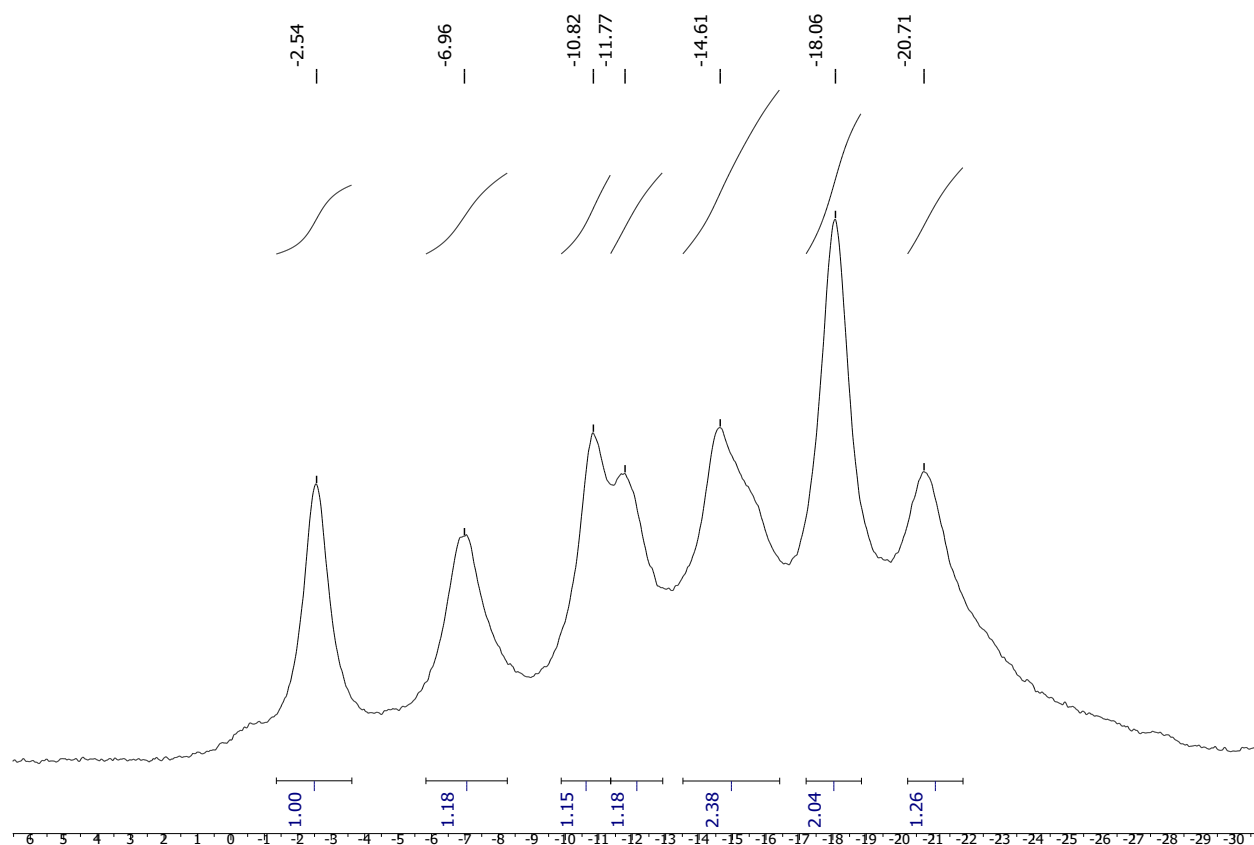

Figure S48.  $^{11}\text{B}\{^1\text{H}\}$  NMR spectrum of **8** in acetone- $\text{d}_6$

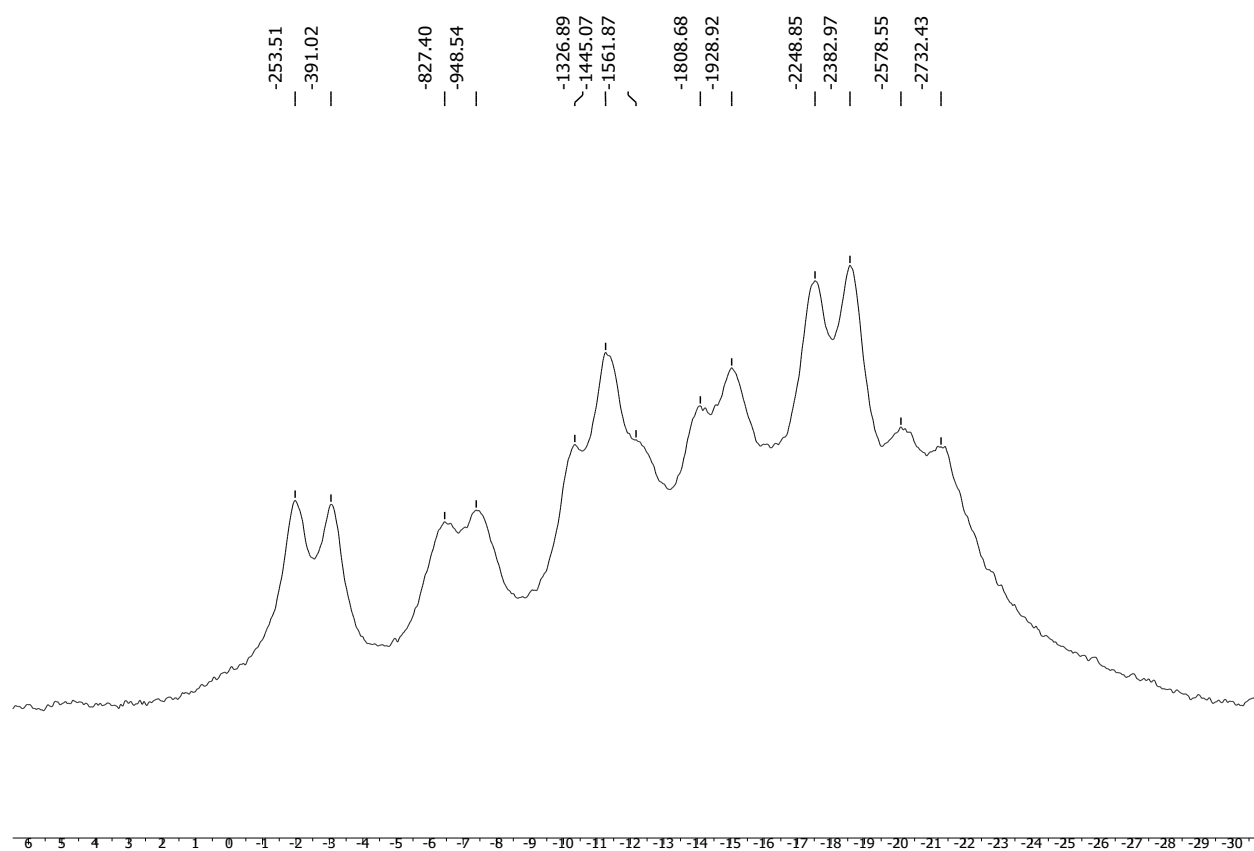

Figure S49.  $^{11}\text{B}$  NMR spectrum of **8** in acetone- $\text{d}_6$

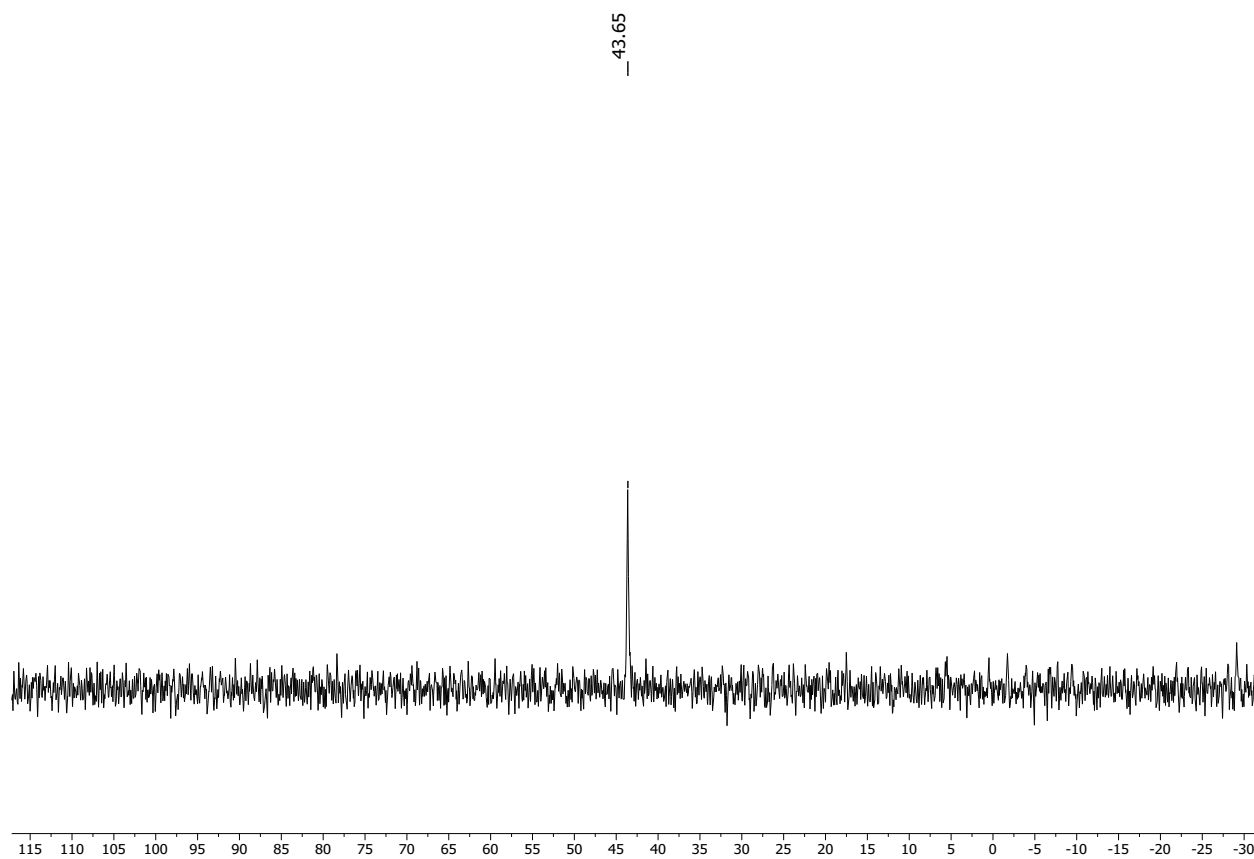

Figure S50.  $^{31}\text{P}$  NMR spectrum of **8** in acetone- $\text{d}_6$

Spectral data for 3-Ph<sub>3</sub>P-3-(1(2)-NC<sub>5</sub>H<sub>4</sub>-2'-S)-*closo*-3,1,2-PdC<sub>2</sub>B<sub>9</sub>H<sub>10</sub> (**9**)

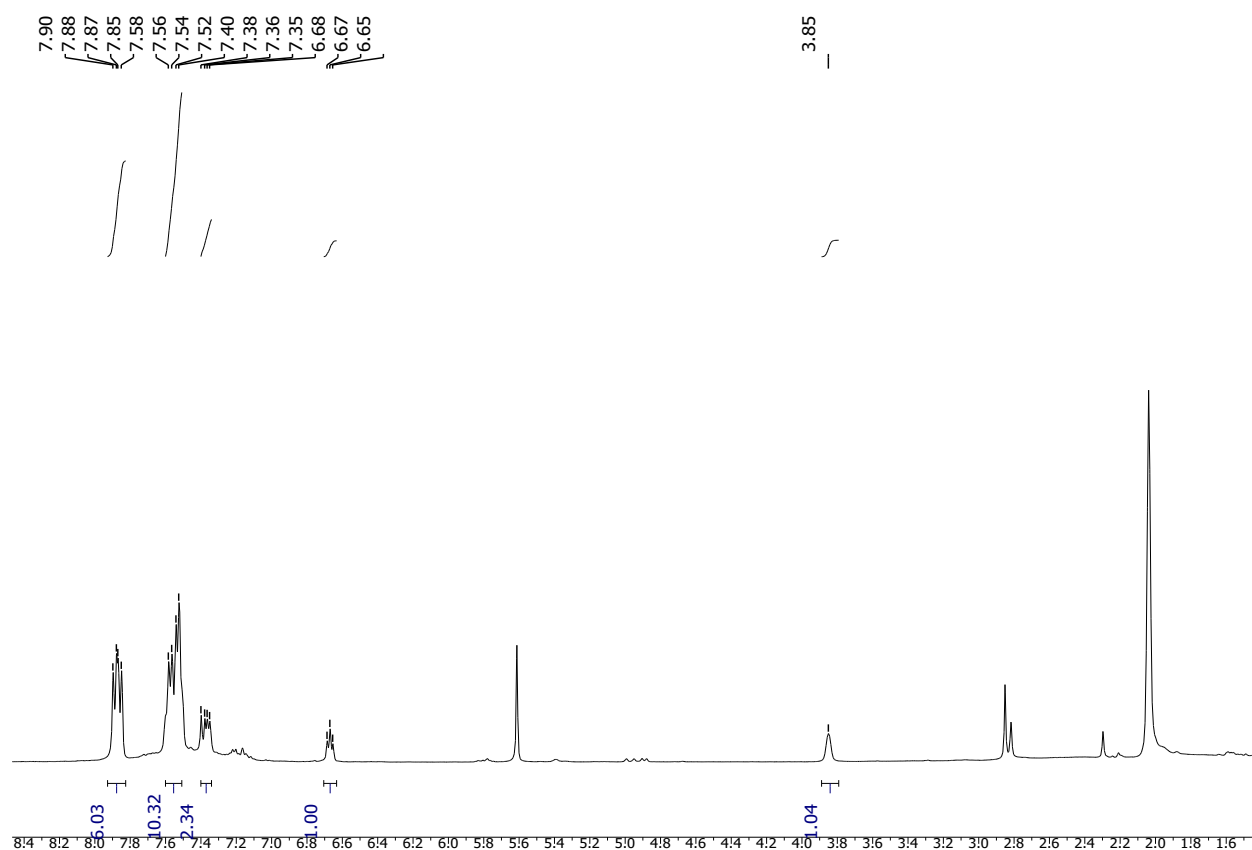

Figure S51. <sup>1</sup>H NMR spectrum of **9** in acetone-d<sub>6</sub>

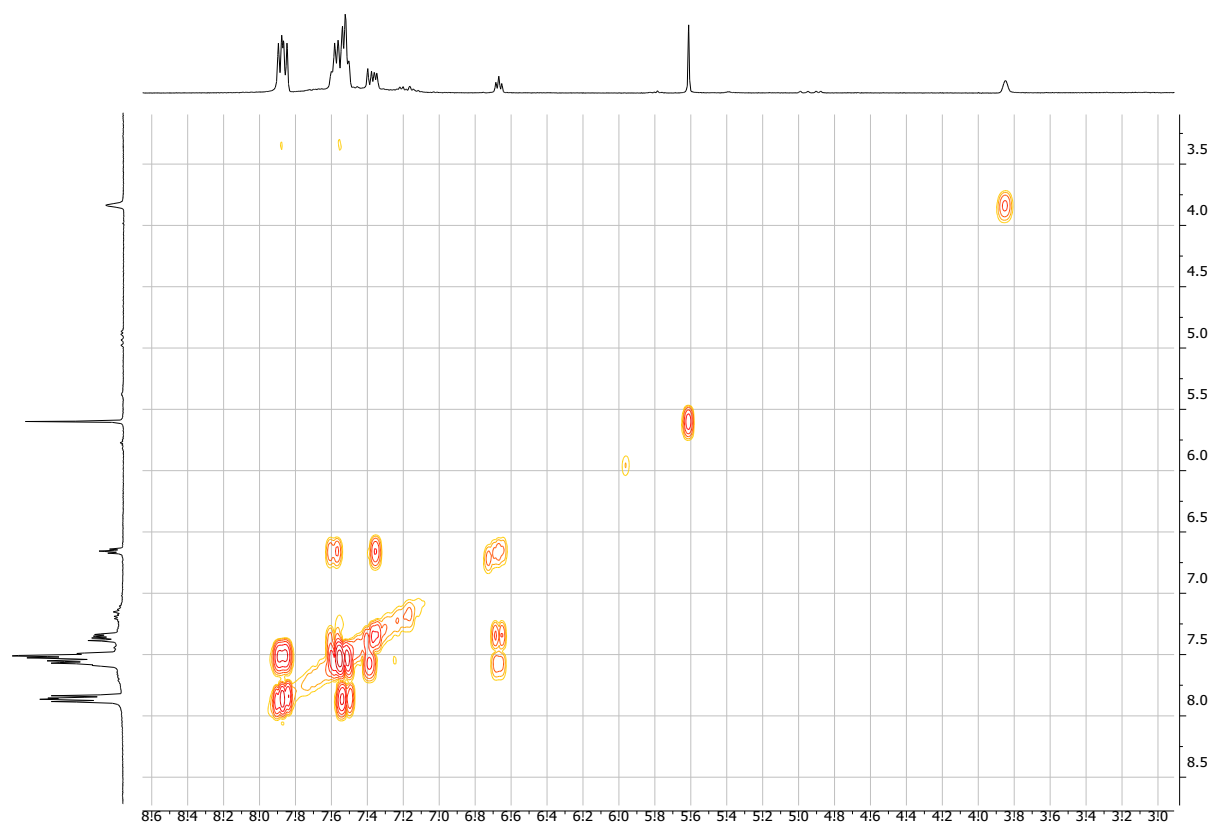

Figure S52. (H,H) COSY NMR spectrum of **9** in acetone-d<sub>6</sub>

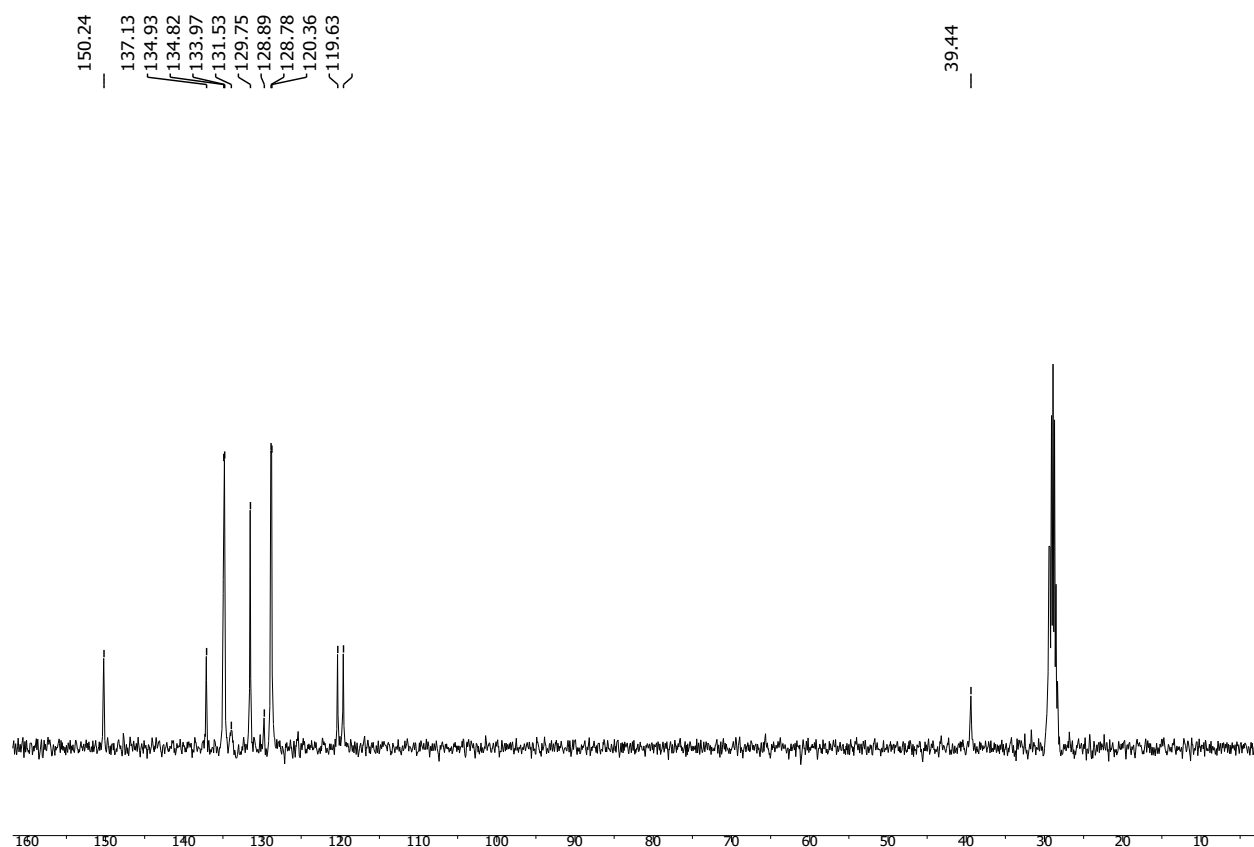

Figure S53.  $^{13}\text{C}$  NMR spectrum of **9** in acetone- $\text{d}_6$

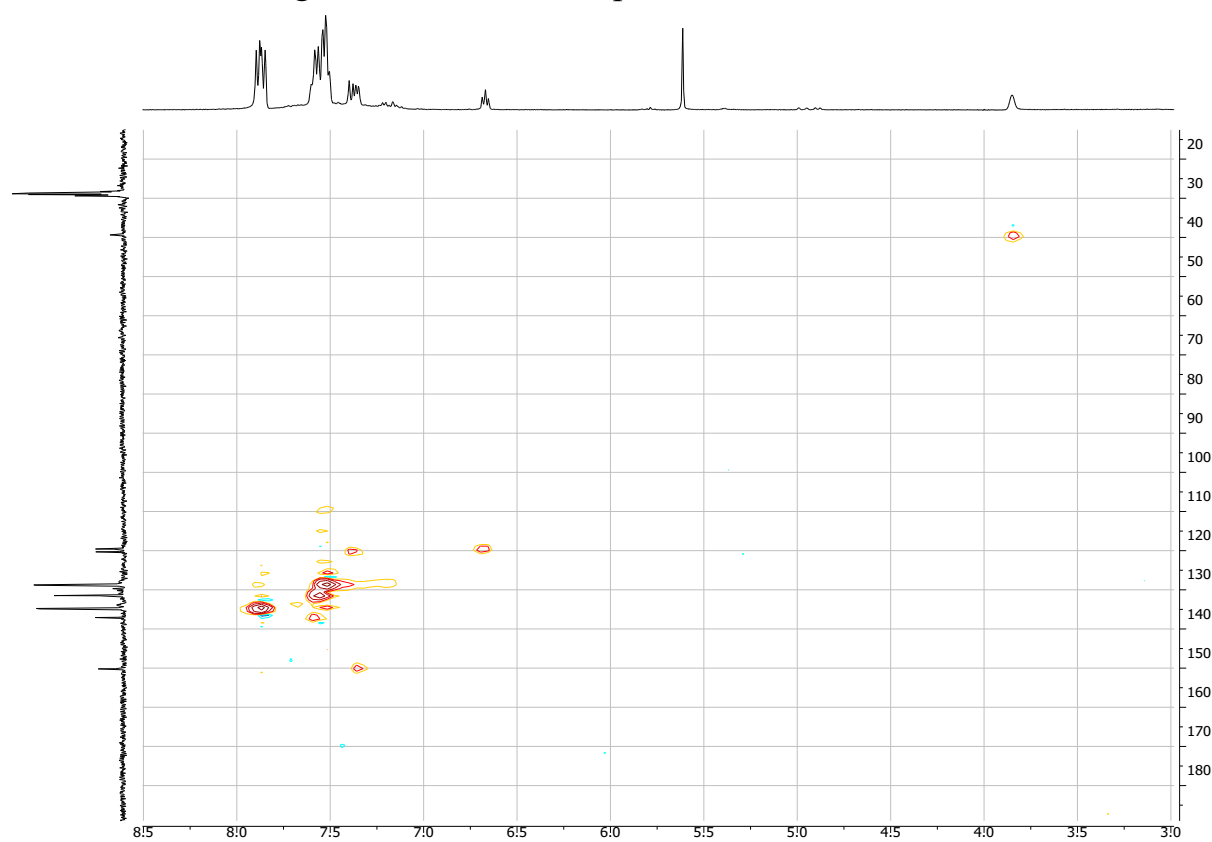

Figure S54. (H)C HSQC NMR spectrum of **9** in acetone- $\text{d}_6$

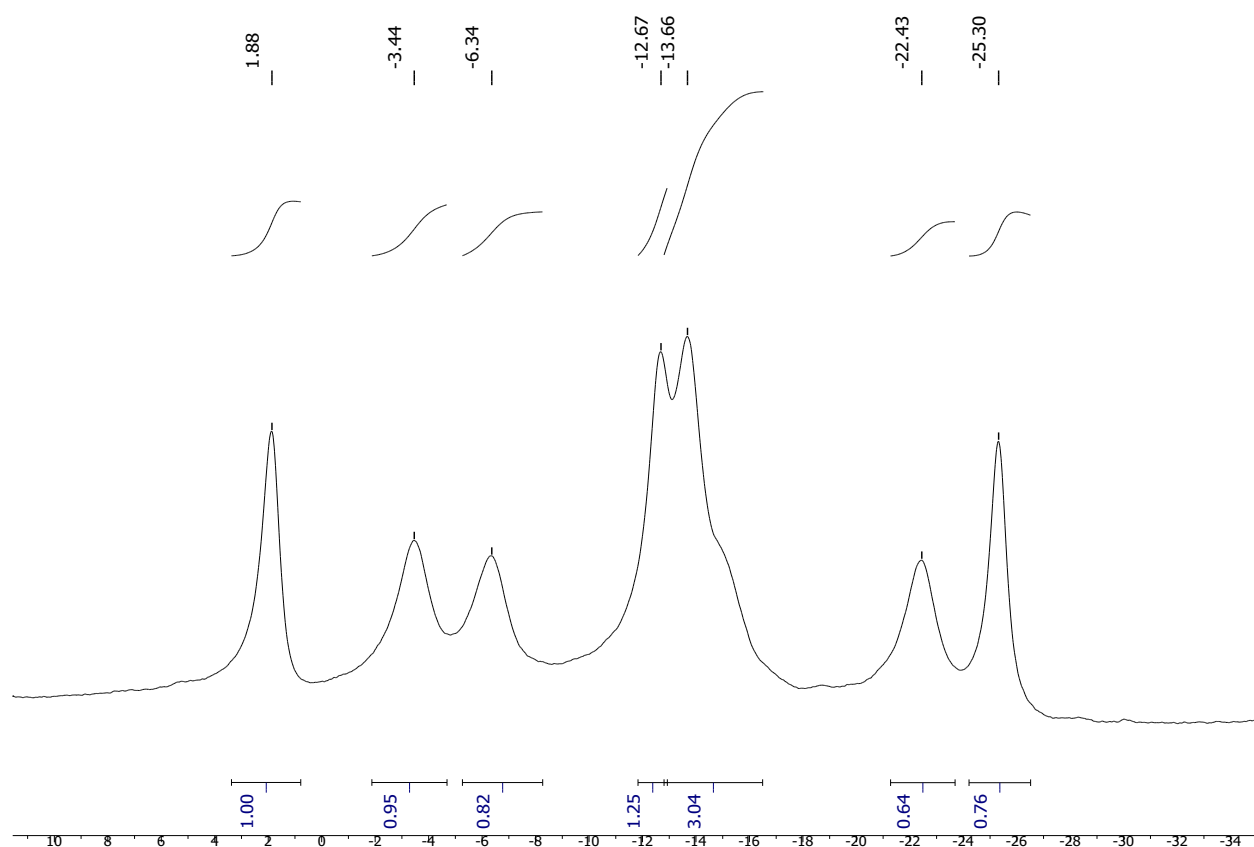

Figure S55.  $^{11}\text{B}\{^1\text{H}\}$  NMR spectrum of **9** in acetone- $\text{d}_6$

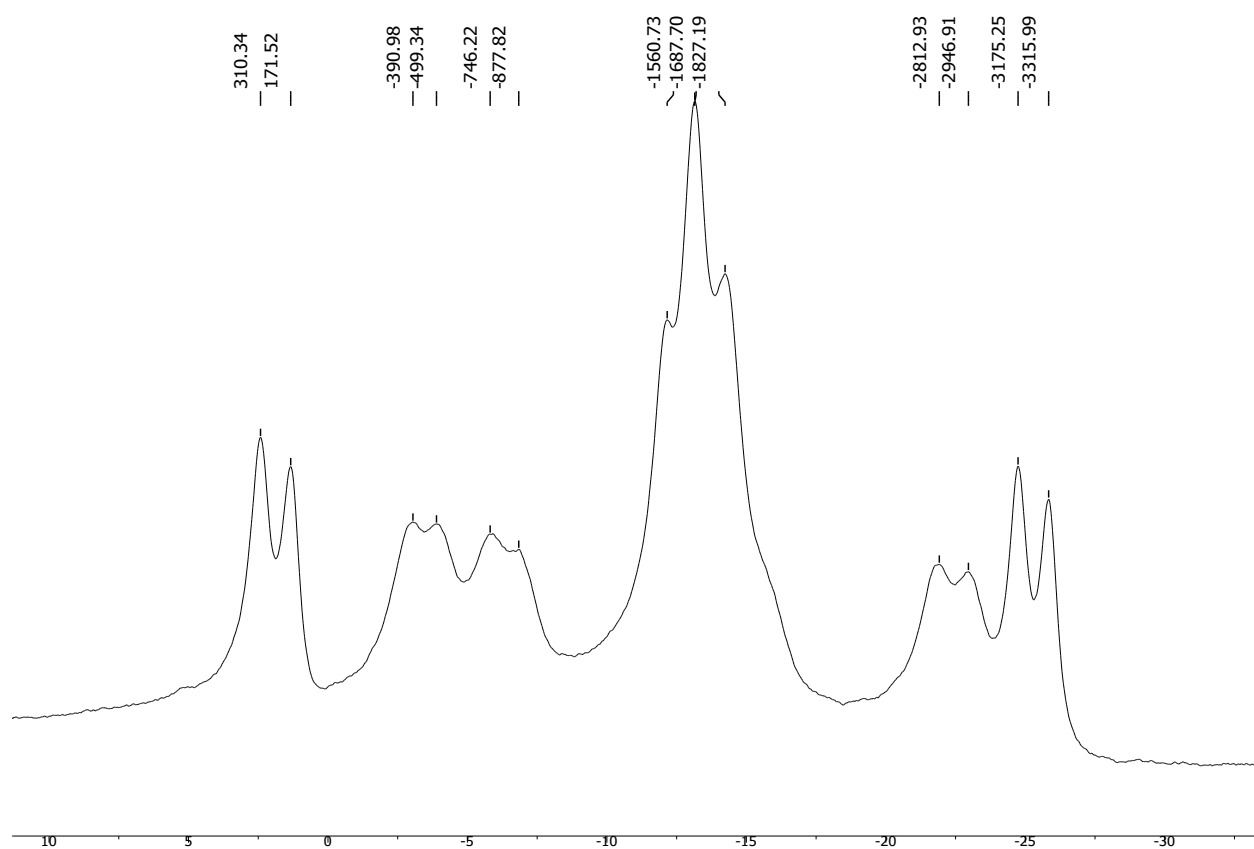

Figure S56.  $^{11}\text{B}$  NMR spectrum of **9** in acetone- $\text{d}_6$

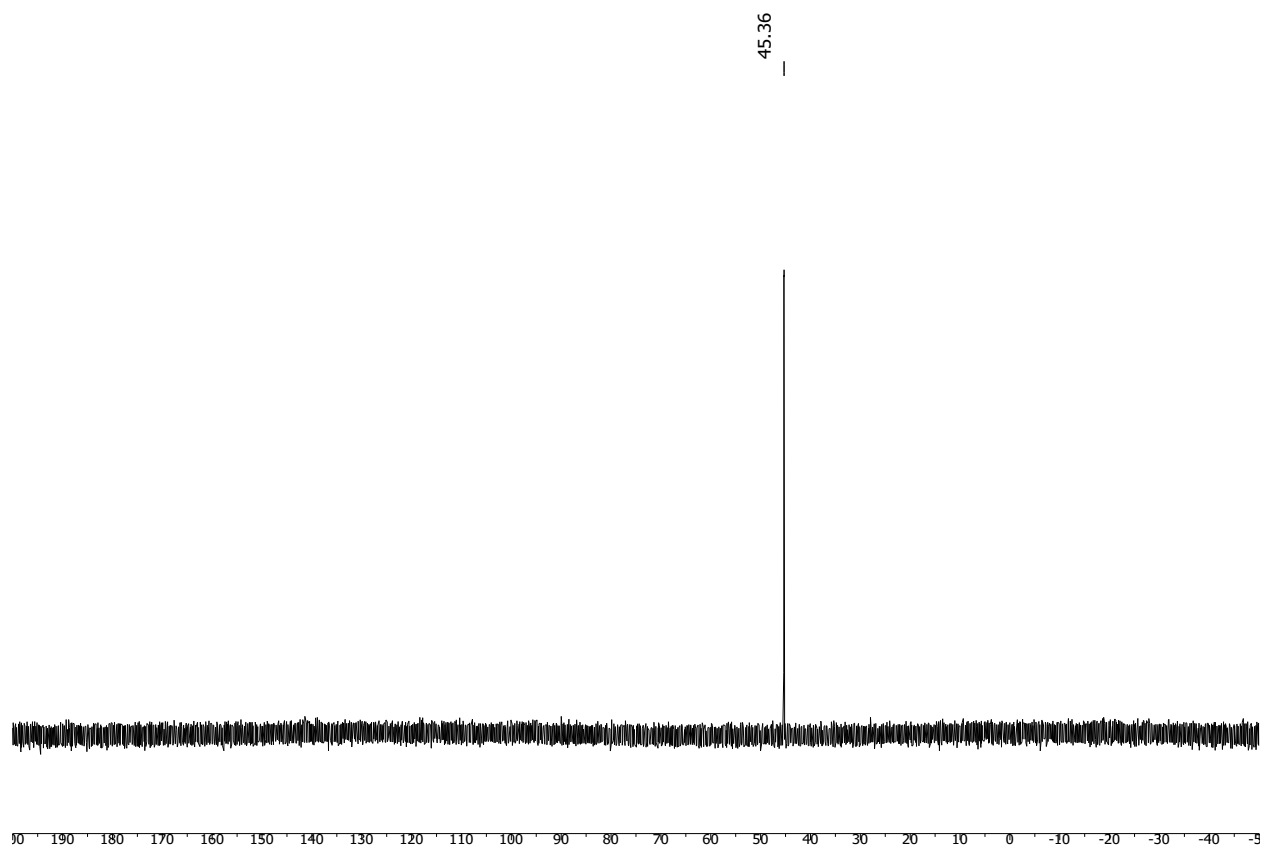

Figure S57. <sup>31</sup>P NMR spectrum of **9** in acetone-d<sub>6</sub>

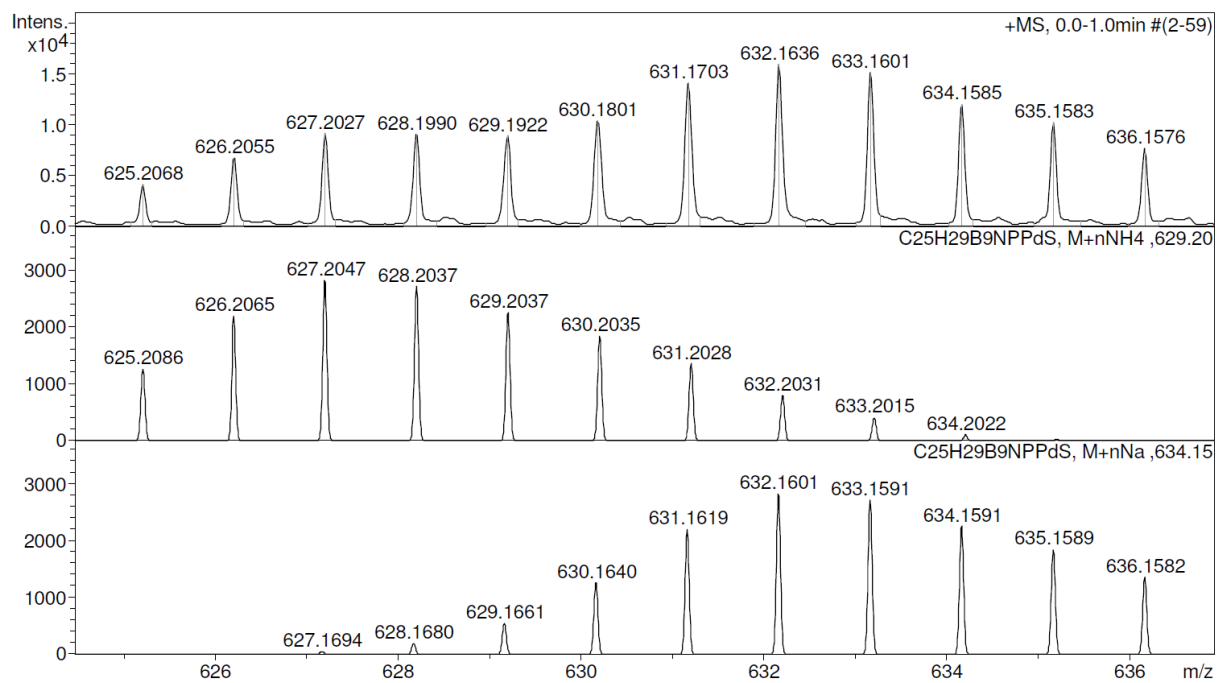

Figure S58. HRMS spectrum of **9**



Spectral data for 3-Ph<sub>3</sub>P-3-(1(2)-NC<sub>5</sub>H<sub>4</sub>-2'-CH<sub>2</sub>S)-*closo*-3,1,2-NiC<sub>2</sub>B<sub>9</sub>H<sub>10</sub> (**10**)

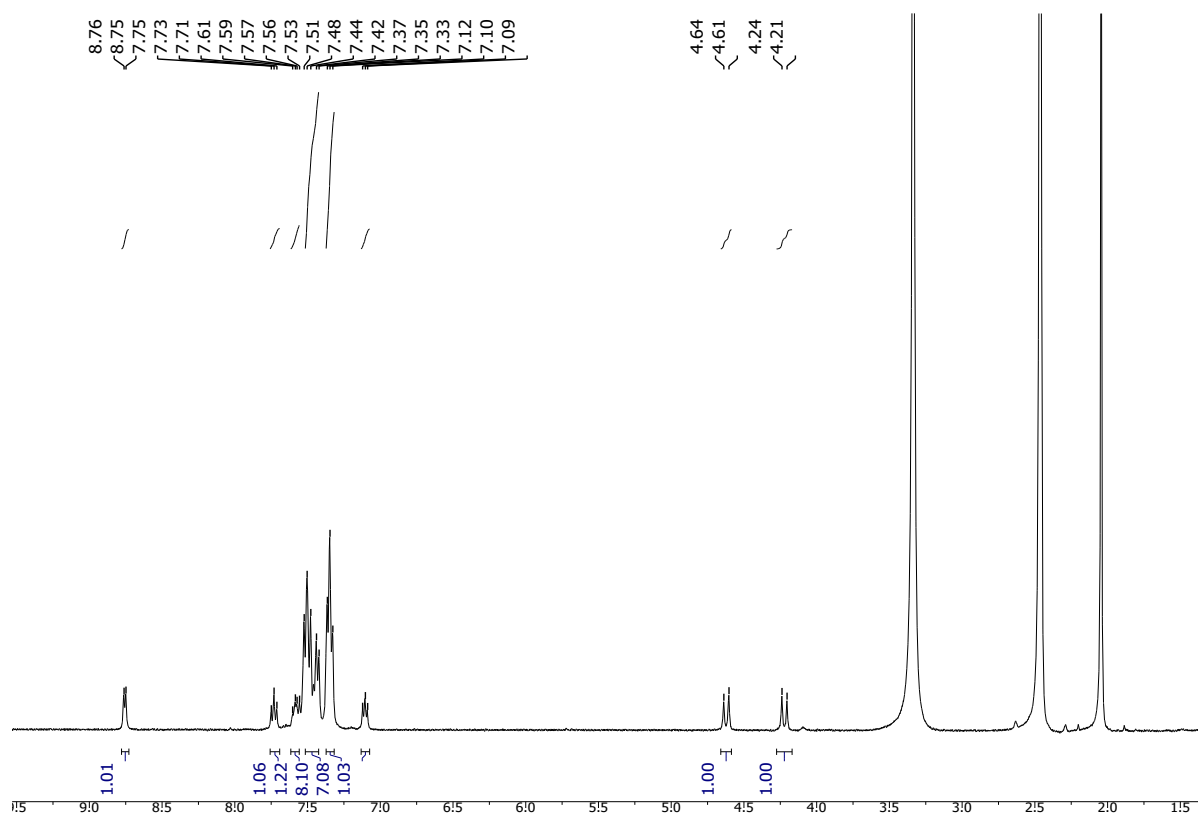

Figure S59. <sup>1</sup>H NMR spectrum of **10** in DMSO-d<sub>6</sub>

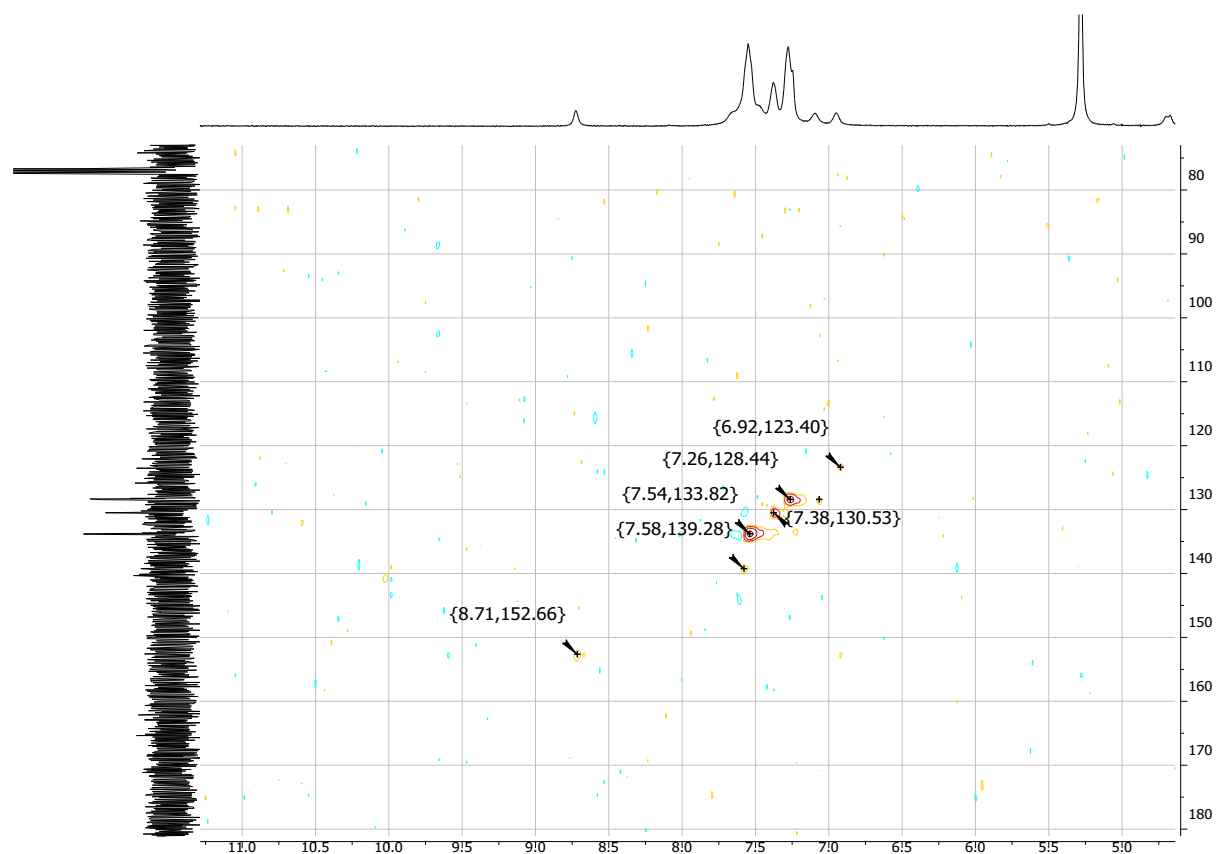

Figure S60. (H)C HSQC NMR spectrum of **10** in CDCl<sub>3</sub>

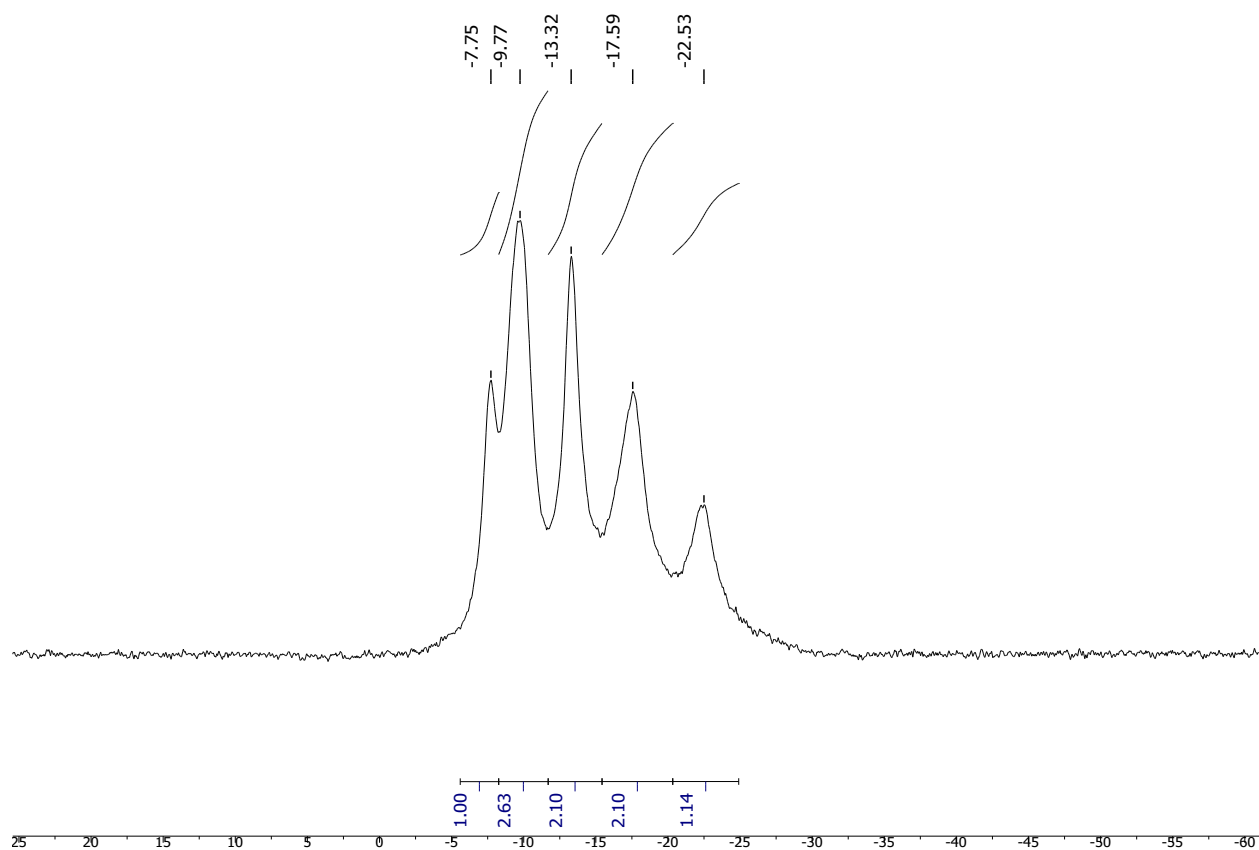

Figure S61.  $^{11}\text{B}\{^1\text{H}\}$  NMR spectrum of **10** in  $\text{CDCl}_3$

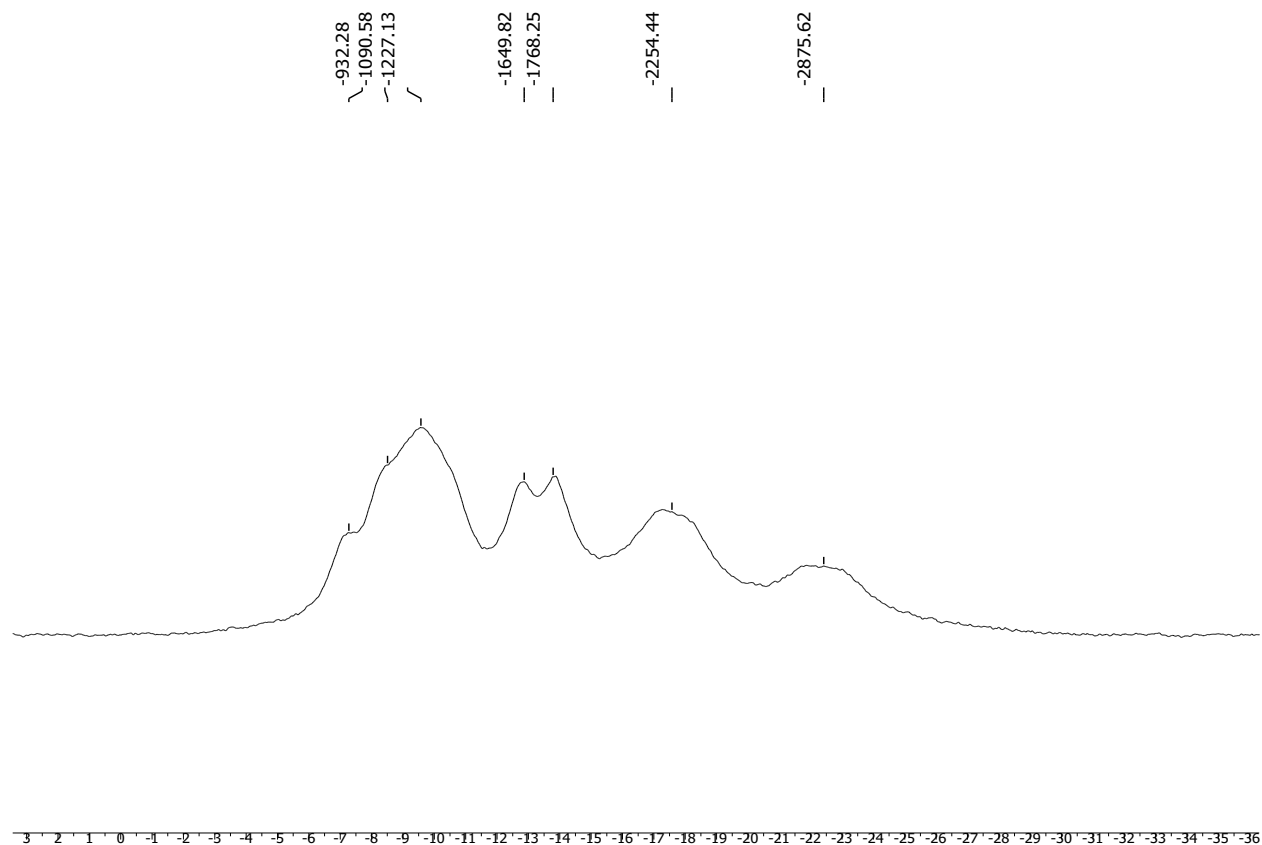

Figure S62.  $^{11}\text{B}$  NMR spectrum of **10** in  $\text{CDCl}_3$

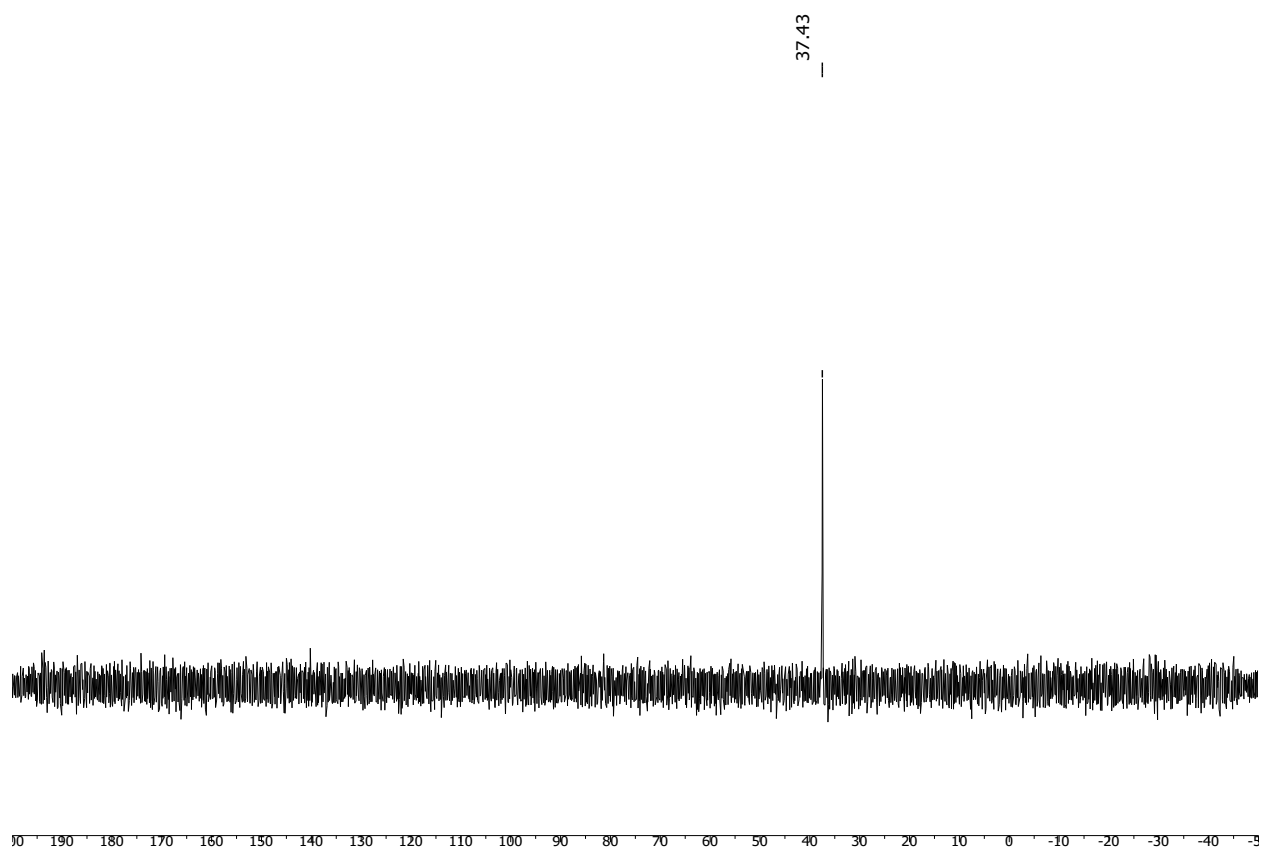

Figure S63.  $^{31}\text{P}$  NMR spectrum of **10** in  $\text{CDCl}_3$

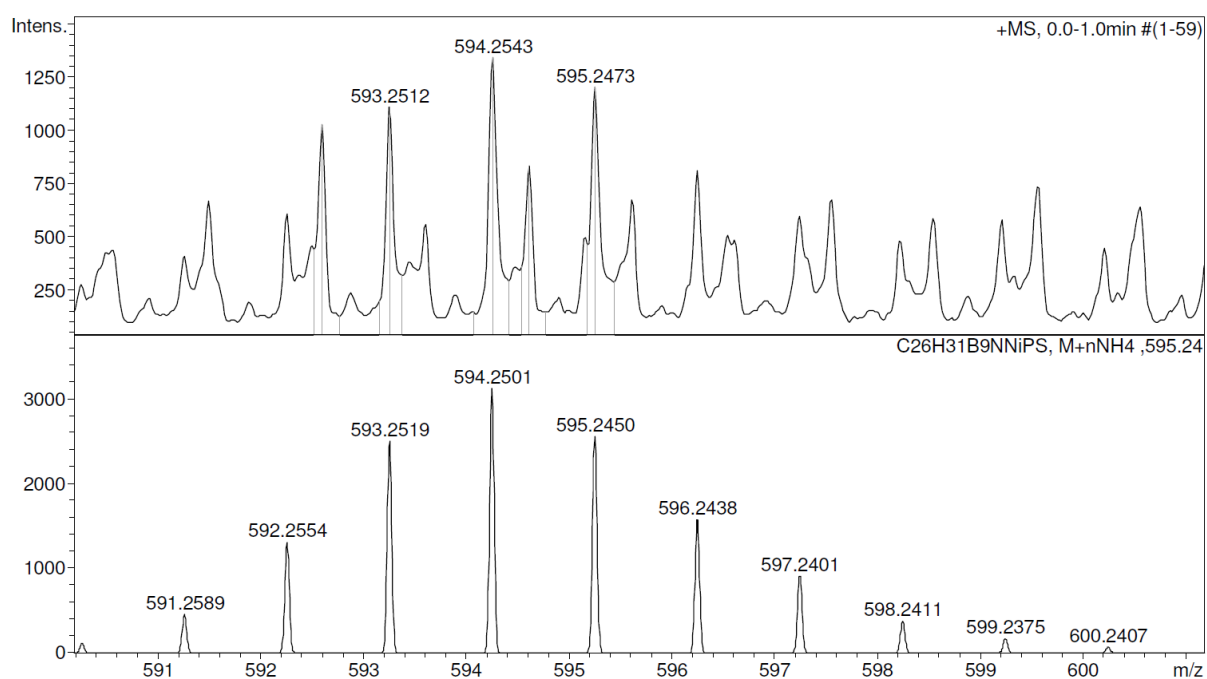

Figure S64. HRMS spectrum of **10**

Spectral data for 3-Ph<sub>3</sub>P-3-(1(2)-NC<sub>5</sub>H<sub>4</sub>-2'-CH<sub>2</sub>S)-*closo*-3,1,2-PdC<sub>2</sub>B<sub>9</sub>H<sub>10</sub> (**11**)

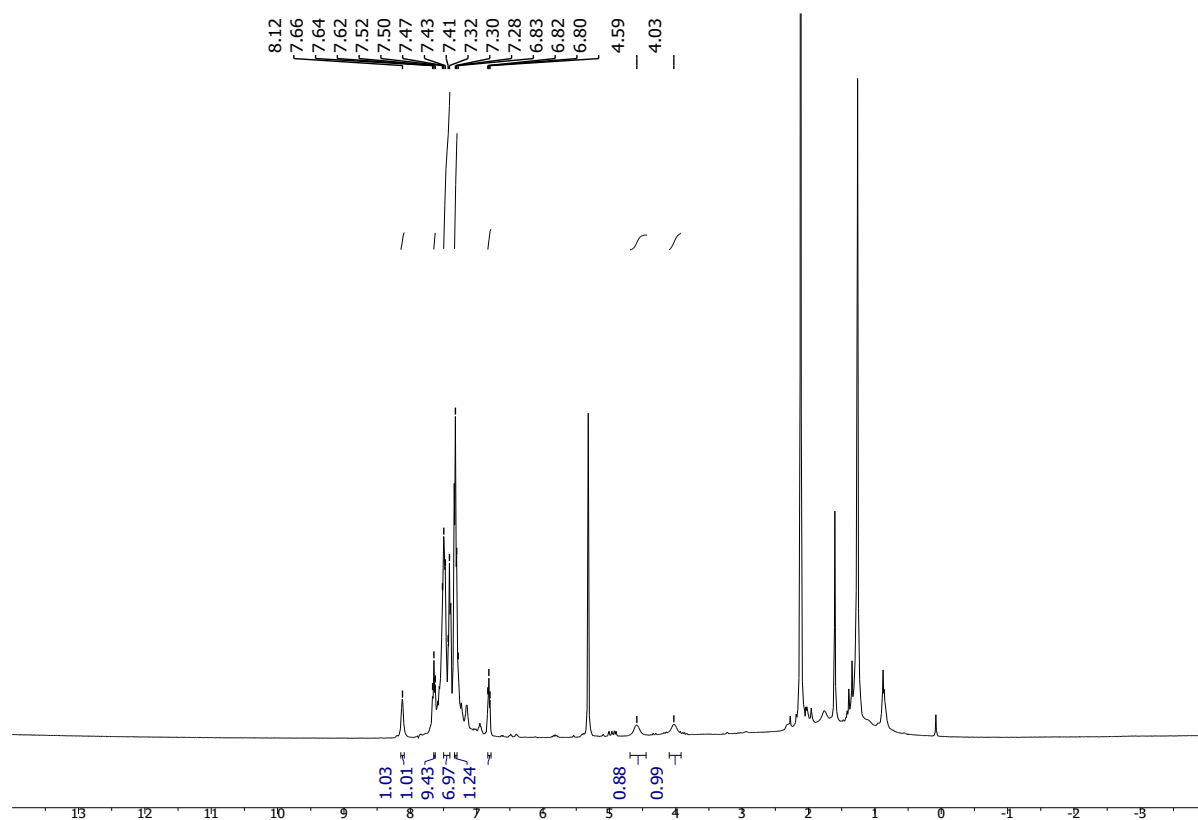

Figure S65. <sup>1</sup>H NMR spectrum of **11** in CD<sub>2</sub>Cl<sub>2</sub>

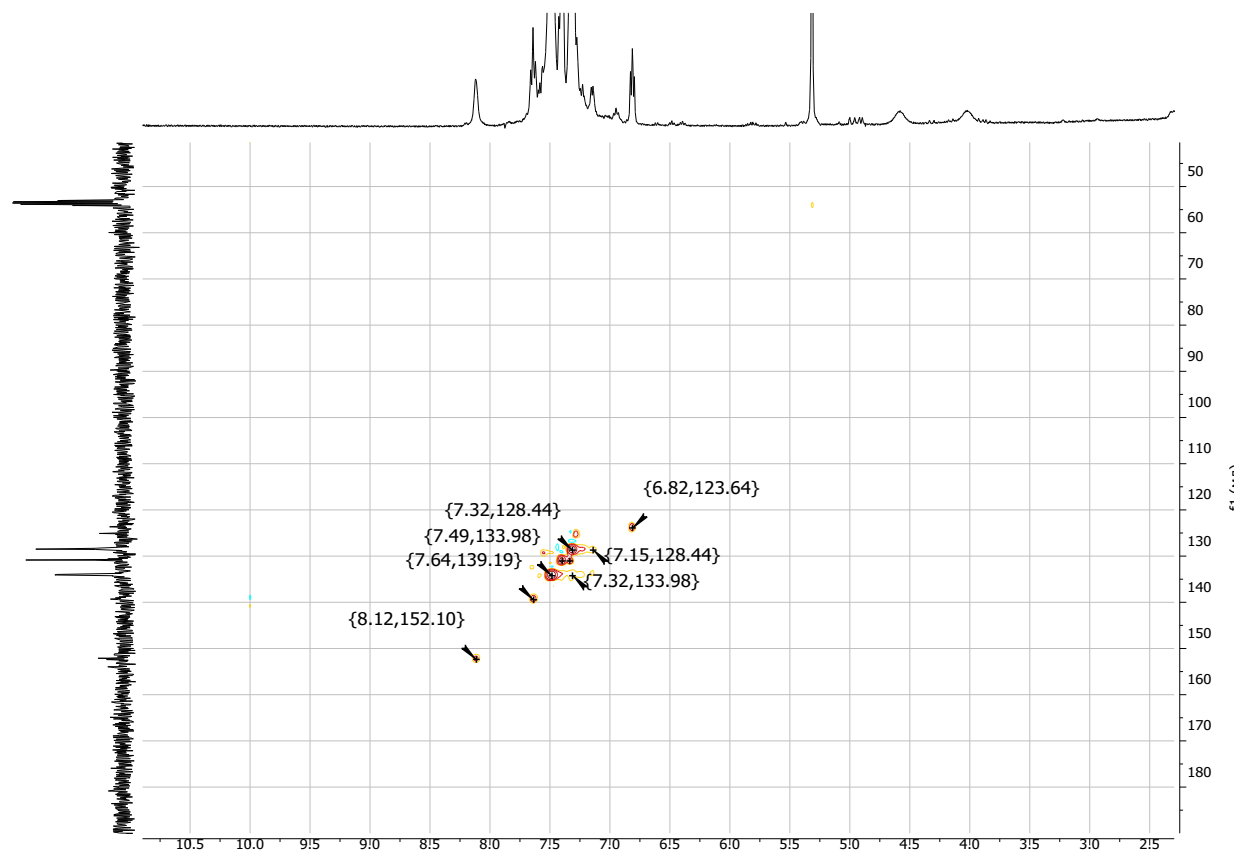

Figure S66. (H)C HSQC NMR spectrum of **11** in CD<sub>2</sub>Cl<sub>2</sub>

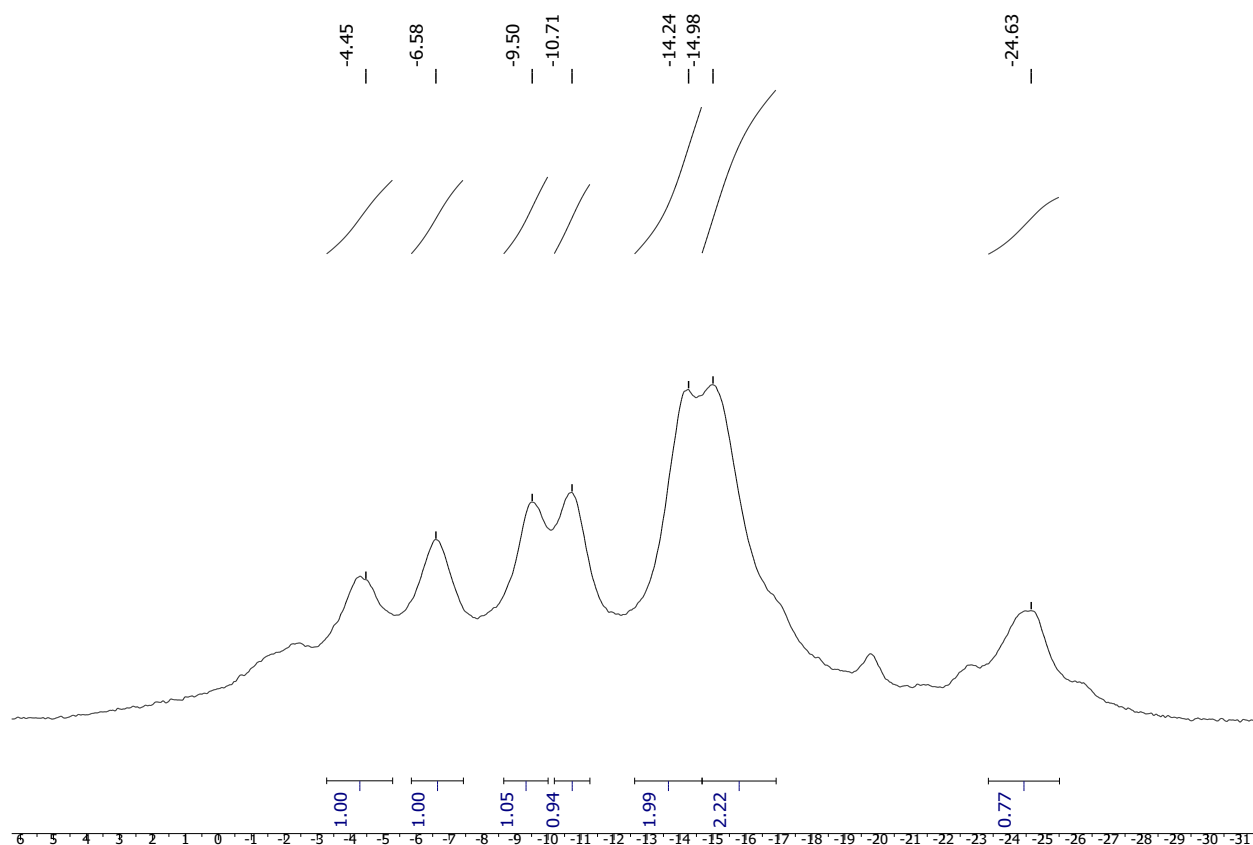

Figure S67.  $^{11}\text{B}\{^1\text{H}\}$  NMR spectrum of **11** in  $\text{CD}_2\text{Cl}_2$

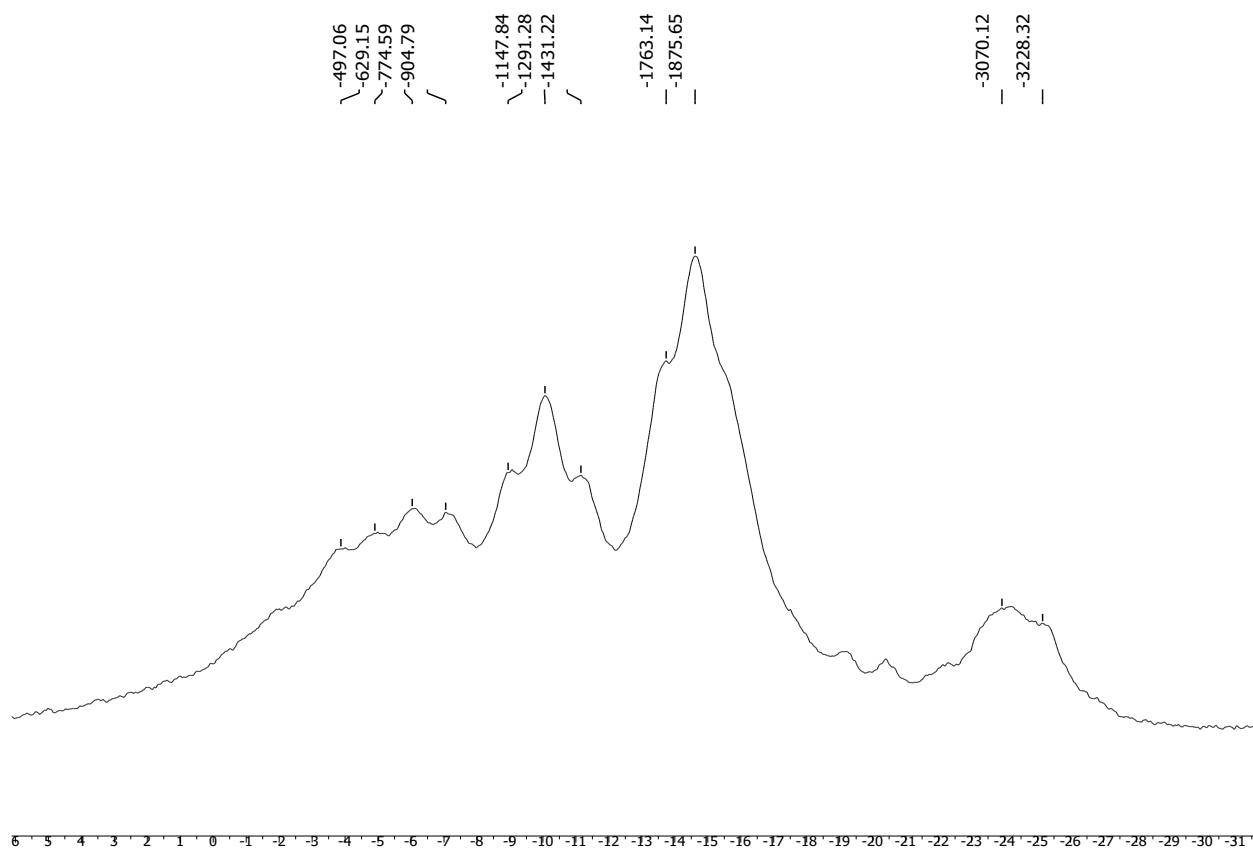

Figure S68.  $^{11}\text{B}$  NMR spectrum of **11** in  $\text{CD}_2\text{Cl}_2$

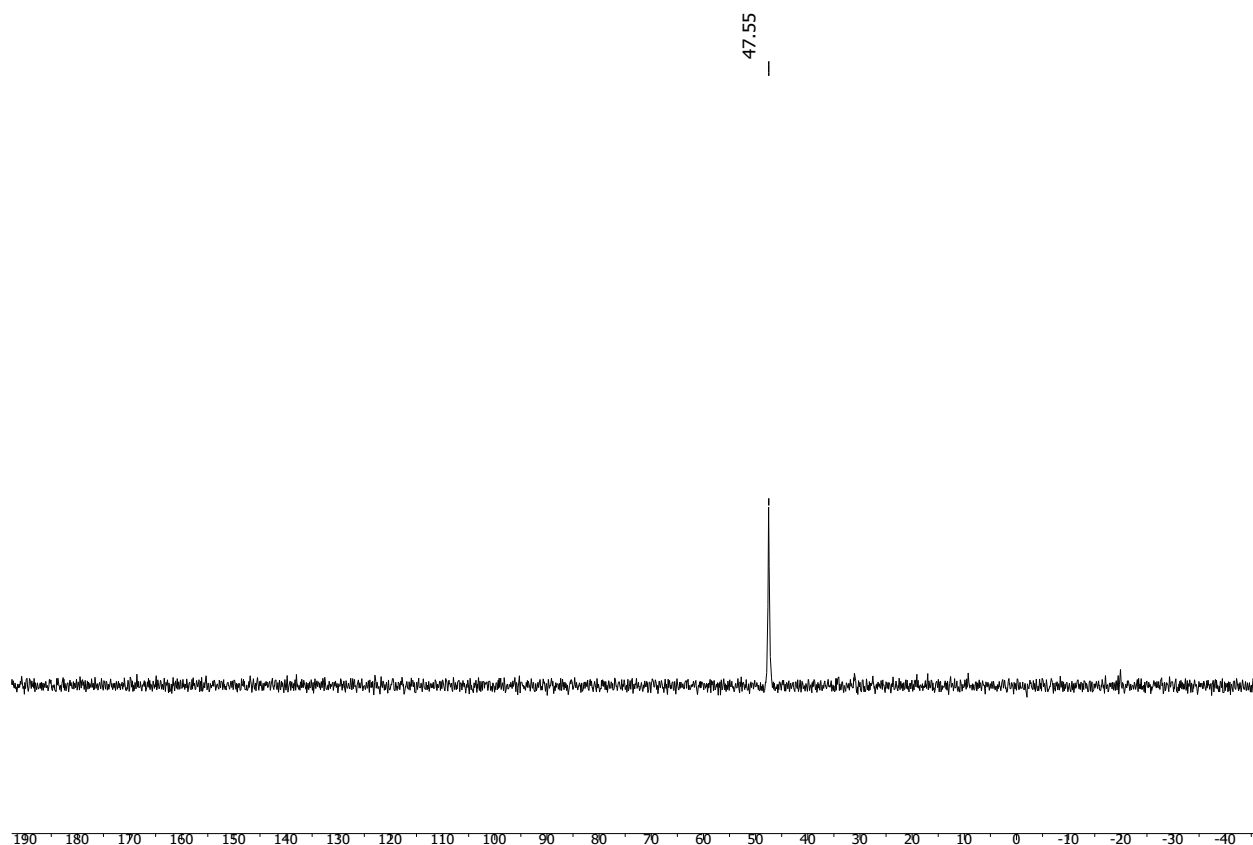

Figure S69. <sup>31</sup>P NMR spectrum of **11** in CD<sub>2</sub>Cl<sub>2</sub>

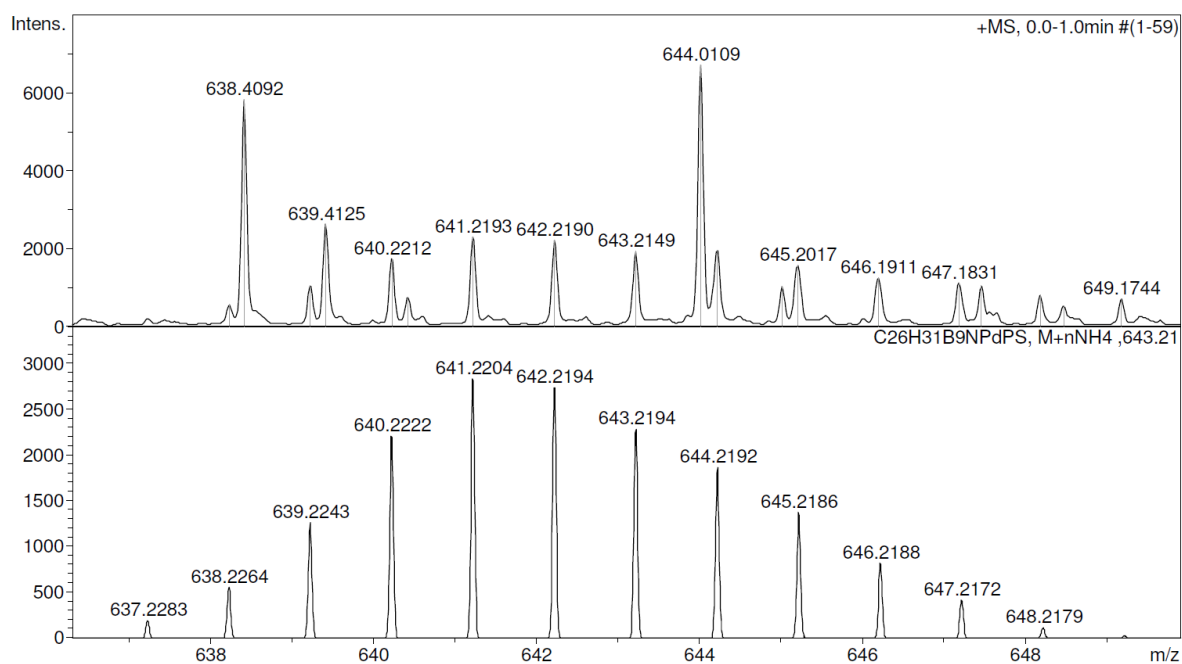

Figure S70. HRMS spectrum of **11**

Table S1. Crystallographic data for compounds **2\*HBr**, **4**, **Cs[5]**\*0.5Me<sub>2</sub>CO, **8**, and **10**.

|                                                                                       | <b>4</b>                                          | <b>Cs[5]</b>                                                                                                         | <b>2*HBr</b>                                                                  | <b>8</b>                                             | <b>10</b>                                             |
|---------------------------------------------------------------------------------------|---------------------------------------------------|----------------------------------------------------------------------------------------------------------------------|-------------------------------------------------------------------------------|------------------------------------------------------|-------------------------------------------------------|
| formula                                                                               | C <sub>8</sub> H <sub>17</sub> B <sub>10</sub> NS | C <sub>8</sub> H <sub>17</sub> B <sub>9</sub> NS <sup>-</sup><br>Cs <sup>+</sup> ·½(C <sub>3</sub> H <sub>6</sub> O) | C <sub>8</sub> H <sub>17</sub> B <sub>9</sub> NS <sup>+</sup> Br <sup>-</sup> | C <sub>25</sub> H <sub>29</sub> B <sub>9</sub> NNiPS | C <sub>26</sub> H <sub>31</sub> B <sub>9</sub> NNiPS  |
| fw                                                                                    | 267.38                                            | 418.52                                                                                                               | 418.52                                                                        | 562.52                                               | 576.55                                                |
| crystal system                                                                        | Monoclinic                                        | Triclinic                                                                                                            | Orthorhombic                                                                  | Monoclinic                                           | Orthorhombic                                          |
| space group                                                                           | <i>P</i> 2 <sub>1</sub> / <i>n</i>                | <i>P</i> -1                                                                                                          | <i>Pna</i> 2 <sub>1</sub>                                                     | <i>P</i> 2 <sub>1</sub> / <i>n</i>                   | <i>P</i> 2 <sub>1</sub> 2 <sub>1</sub> 2 <sub>1</sub> |
| <i>a</i> , Å                                                                          | 11.8345(13)                                       | 7.9686(5)                                                                                                            | 24.234(3)                                                                     | 10.6347(3)                                           | 8.489(3)                                              |
| <i>b</i> , Å                                                                          | 6.8603(7)                                         | 8.8768(6)                                                                                                            | 8.7044(9)                                                                     | 19.0306(4)                                           | 18.066(5)                                             |
| <i>c</i> , Å                                                                          | 17.5569(19)                                       | 13.7553(9)                                                                                                           | 7.4298(8)                                                                     | 14.0144(3)                                           | 18.928(7)                                             |
| $\alpha$ , deg.                                                                       | 90                                                | 99.784(2)                                                                                                            | 90                                                                            | 90                                                   | 90                                                    |
| $\beta$ , deg.                                                                        | 90.078(3)                                         | 102.455(2)                                                                                                           | 90                                                                            | 104.6870(10)                                         | 90                                                    |
| $\gamma$ , deg.                                                                       | 90                                                | 107.360(2)                                                                                                           | 90                                                                            | 90                                                   | 90                                                    |
| <i>V</i> , Å <sup>3</sup>                                                             | 1425.4(3)                                         | 877.69(10)                                                                                                           | 1567.3(3)                                                                     | 2743.62(11)                                          | 2902.7(18)                                            |
| <i>Z</i>                                                                              | 4                                                 | 2                                                                                                                    | 4                                                                             | 4                                                    | 4                                                     |
| <i>d</i> <sub>cryst</sub> , g·cm <sup>-3</sup>                                        | 1.246                                             | 1.584                                                                                                                | 1.417                                                                         | 1.362                                                | 1.319                                                 |
| <i>F</i> (000)                                                                        | 552                                               | 408                                                                                                                  | 664                                                                           | 1160                                                 | 1192                                                  |
| $\mu$ , mm <sup>-1</sup>                                                              | 0.202                                             | 2.217                                                                                                                | 2.733                                                                         | 0.860                                                | 0.814                                                 |
| $\theta$ range, deg.                                                                  | 1.16 – 27.20                                      | 2.48 – 28.15                                                                                                         | 2.49 – 28.03                                                                  | 2.25 – 26.97                                         | 2.15 – 26.05                                          |
| independent rflns                                                                     | 3171                                              | 4276                                                                                                                 | 3775                                                                          | 5968                                                 | 5521                                                  |
| <i>R</i> <sub>int</sub>                                                               | 0.0447                                            | 0.0239                                                                                                               | 0.0474                                                                        | 0.0539                                               | 0.1380                                                |
| Completeness to $\theta$ , %                                                          | 99.8                                              | 99.7                                                                                                                 | 99.8                                                                          | 99.9                                                 | 96.9                                                  |
| refined parameters                                                                    | 226                                               | 213                                                                                                                  | 187                                                                           | 383                                                  | 351                                                   |
| <i>GOF</i> ( <i>F</i> <sup>2</sup> )                                                  | 1.040                                             | 1.111                                                                                                                | 1.078                                                                         | 1.038                                                | 0.952                                                 |
| rflns with <i>I</i> > 2 $\sigma$ ( <i>I</i> )                                         | 2904                                              | 3980                                                                                                                 | 3379                                                                          | 4610                                                 | 2702                                                  |
| <i>R</i> <sub>1</sub> ( <i>F</i> ) ( <i>I</i> > 2 $\sigma$ ( <i>I</i> )) <sup>a</sup> | 0.0275                                            | 0.0230                                                                                                               | 0.0297                                                                        | 0.0298                                               | 0.0822                                                |
| <i>wR</i> <sub>2</sub> ( <i>F</i> <sup>2</sup> ) (all data) <sup>b</sup>              | 0.0688                                            | 0.0603                                                                                                               | 0.0692                                                                        | 0.0683                                               | 0.1986                                                |
| Largest diff. peak/hole,<br><i>e</i> ·Å <sup>-3</sup>                                 | 0.163/-0.218                                      | 0.814/-0.888                                                                                                         | 0.400/-0.315                                                                  | 0.319/-0.275                                         | 0.722/-1.139                                          |

<sup>a</sup>  $R_1 = \sum |F_o - |F_c|| / \sum (F_o)$ ; <sup>b</sup>  $wR_2 = (\sum [w(F_o^2 - F_c^2)^2] / \sum [w(F_o^2)^2])^{1/2}$
